# Supplementary material for: Trinuclear coordination assemblies of low-spin dicyano manganese(ii) (S = 1/2) and iron(ii) (S = 0) phthalocyanines with manganese(ii) acetylacetonate, tris(cyclopentadienyl)gadolinium(iii) and neodymium(iii)
Source: Royal Society of Chemistry journal article supplement (doi:10.1039/d2dt01052f), 2022-01-01
Supplement: d2dt01052f1.pdf [file d2dt01052f1.pdf]

Trinuclear coordination assemblies of low-spin dicyano manganese(II) ( $S = 1/2$ ) and iron(II) ( $S = 0$ ) phthalocyanines with manganese(II) acetylacetonate and tris(cyclopentadienyl)gadolinium(III) and neodymium(III)

Nikita R. Romanenko,<sup>a</sup> Alexey V. Kuzmin,<sup>b</sup> Maxim V. Mikhailenko,<sup>a</sup> Maxim A. Faraonov,<sup>a</sup>  
Salavat S. Khasanov,<sup>c</sup> Evgeniya I. Yudanov,<sup>a</sup> Alexander F. Shestakov,<sup>a</sup> Akihiro Otsuka,<sup>c, d</sup>  
Hideki Yamochi,<sup>c, d</sup> Hiroshi Kitagawa,<sup>c</sup> and Dmitri V. Konarev<sup>a\*</sup>

<sup>a</sup>Institute of Problems of Chemical Physics RAS, Chernogolovka, Moscow region, 142432 Russia;

<sup>b</sup>Institute of Solid State Physics RAS, Chernogolovka, Moscow region, 142432 Russia;

<sup>c</sup>Division of Chemistry, Graduate School of Science, Kyoto University, Sakyo-ku, Kyoto 606-8502, Japan;

<sup>d</sup>Research Center for Low Temperature and Materials Sciences, Kyoto University, Sakyo-ku, Kyoto 606-8501, Japan.

## Supporting information

### EXPERIMENTAL

**Materials.** Manganese(II) phthalocyanine ( $\text{Mn}^{\text{II}}\text{Pc}$ , >97%, Strem), iron(II) phthalocyanine ( $\text{Fe}^{\text{II}}\text{Pc}$ , >90%, Aldrich), iron(II) hexadecachlorophthalocyanine ( $\text{Fe}^{\text{II}}\text{PcCl}_{16}$ , >98%, Porphychem), tris(cyclopentadienyl)neodymium ( $\text{Cp}_3\text{Nd}^{\text{III}}$ , >99%, Strem), tris(cyclopentadienyl)gadolinium ( $\text{Cp}_3\text{Gd}^{\text{III}}$ , >99%, Strem), manganese(II) acetylacetonate ( $\text{Mn}^{\text{II}}(\text{acac})_2$ , >95%, Strem), potassium cyanide (KCN, >98%, Aldrich). Cryptand[2.2.2] (hereinafter abbreviated as Cryptand) was purchased from Acros. *o*-Dichlorobenzene ( $\text{C}_6\text{H}_4\text{Cl}_2$ , 99%) was distilled over  $\text{CaH}_2$  under reduced pressure in argon atmosphere, and *n*-hexane were distilled over Na/benzophenone in argon atmosphere. Solvents were degassed and stored in an MBraun 150B-G glove box. Complexes **1** - **8** were synthesized and stored in the glove box with controlled atmosphere containing less than 1 ppm of water and oxygen. KBr pellets used for the IR and UV-visible-NIR analyses of **1-8** were prepared in the glove box. Magnetic measurements were performed on carefully purified and tested crystals of **1-7** sealed in a 2 mm quartz tube under ambient pressure of argon.

**General.** UV-visible-NIR spectra were measured in KBr pellets on a PerkinElmer Lambda 1050 spectrometer in the 250-2500 nm range. FT-IR spectra were obtained in KBr pellets with a PerkinElmer Spectrum 400 spectrometer ( $400\text{-}7800\text{ cm}^{-1}$ ). EPR spectra were recorded for a polycrystalline sample of **1-7** from room temperature (295 K) down to liquid helium temperature with a JEOL JES-TE 200 X-band ESR spectrometer equipped with a JEOL ES-CT470 cryostat. A Quantum Design MPMS-XL SQUID magnetometer was used to measure static magnetic susceptibilities of **1-4**, **6** and **7** at 1 kOe magnetic field in heating and cooling conditions in the 1.9- 300 K range. A sample holder contribution and core temperature independent diamagnetic susceptibility ( $\chi_d$ ) were subtracted from the experimental data. The  $\chi_d$  values were estimated by the extrapolation of the data in the high-temperature range by fitting the data with the following expression:  $\chi_M = C/(T - \Theta) + \chi_d$ , where  $C$  is Curie constant and  $\Theta$  is Weiss temperature. Dependencies of magnetization vs magnetic field (up to 5T) were also measured at 1.9-2.0 K for the samples of **2-4** cooled in zero field conditions.

**Synthesis.** Crystals of **1-8** were obtained by diffusion technique. The obtained solutions were cooled down to room temperature and filtered into a 1.8 cm diameter, 50 mL glass tube with a ground glass plug, and then 24 mL of *n*-hexane was layered over the solution. Slow mixing of the solutions over 1-1.5 months resulted in precipitation of crystals. The solvent was then decanted from the crystals, and they were washed with *n*-hexane.

Crystals of  $\{\text{Cryptand}(\text{K}^+)\}_2\{\text{Mn}^{\text{II}}(\text{CN})_2\text{Pc}\}^{2-}\cdot\text{C}_6\text{H}_4\text{Cl}_2$  (**1**) and  $\{\text{Cryptand}(\text{K}^+)\}_2\{\text{Fe}^{\text{II}}(\text{CN})_2\text{Pc}\}^{2-}\cdot 0.72\text{C}_6\text{H}_4\text{Cl}_2$  (**5**) were obtained similarly via the interaction of  $\text{Mn}^{\text{II}}\text{Pc}$  (24 mg, 0.042 mmol) or  $\text{Fe}^{\text{II}}\text{Pc}$  (24 mg, 0.042 mmol) with an excess of KCN (30 mg, 0.46 mmol) and two equivalents of cryptand[2.2.2] (32 mg, 0.084 mmol) in *o*-dichlorobenzene upon stirring the solution at 60°C during one day. Phthalocyanines completely dissolved to form deep violet (for  $\text{Mn}^{\text{II}}\text{Pc}$ ) and deep green (for  $\text{Fe}^{\text{II}}\text{Pc}$ ) solutions. Solutions were cooled down to room temperature and filtered into the glass tubes. After slow mixing with *n*-hexane black crystals were obtained in 62% and 74% yield, respectively. Crystals had the shape of dark black blocks. X-ray diffraction analysis showed that crystals of only one crystal phase formed in each synthesis and all crystals are isostructural (see Table S2) to previously investigated complex  $\{\text{Cryptand}(\text{K}^+)\}_2\{\text{Sn}^{\text{II}}(\text{NC})_2\text{Pc}\}^{2-}\cdot\text{C}_6\text{H}_4\text{Cl}_2$ .<sup>1</sup> Elemental analysis confirmed the composition of **1** to be:  $\text{C}_{76}\text{H}_{86}\text{N}_{14}\text{O}_{12}\text{MnCl}_2$ ,  $M_r = 1512.66 \text{ g mol}^{-1}$ : Calcd. C = 60.34, H = 5.68, N = 12.96, Cl = 4.60%; Found: C = 59.94, H = 5.31, N = 12.88, Cl = 4.52%. The composition of **5** was determined from X-ray diffraction on single crystal. Testing of several crystals from the synthesis showed that all of them belong to one crystal phase (Table S1). It should also be noted that all crystals in the synthesis of **5** had the same shape and color.

Crystals of  $\{\text{Cryptand}(\text{K}^+)\}_2\{\text{Mn}^{\text{II}}(\text{CN})_2\text{Pc}\cdot(\text{Mn}^{\text{II}}(\text{acac})_2)_2\}^{2-}\cdot 5\text{C}_6\text{H}_4\text{Cl}_2$  (**2**), and  $\{\text{Cryptand}(\text{K}^+)\}_2\{\text{Mn}^{\text{II}}(\text{CN})_2\text{Pc}\cdot(\text{Cp}_3\text{Gd}^{\text{III}})_2\}^{2-}\cdot 4\text{C}_6\text{H}_4\text{Cl}_2$  (**3**) and  $\{\text{Cryptand}(\text{K}^+)\}_2\{\text{Mn}^{\text{II}}(\text{CN})_2\text{Pc}\cdot(\text{Cp}_3\text{Nd}^{\text{III}})_2\}^{2-}\cdot 4\text{C}_6\text{H}_4\text{Cl}_2$  (**4**) were obtained in a similar way. Initially solution of  $\{\text{Cryptand}(\text{K}^+)\}_2\{\text{Mn}^{\text{II}}(\text{CN})_2\text{Pc}\}^{2-}$  salt was obtained via the interaction of  $\text{Mn}^{\text{II}}\text{Pc}$  (24 mg, 0.042 mmol) with an excess of KCN (30 mg, 0.46 mmol) and two equivalents of cryptand[2.2.2] (32 mg, 0.084 mmol) in *o*-dichlorobenzene upon stirring the solution at 60°C during one day. Phthalocyanines completely

dissolved to form red-violet solution. They were cooled down to room temperature and filtered into the flask containing 2.26 equivalents of  $\text{Mn}^{\text{II}}(\text{acac})_2$  (24 mg, 0.0948 mmol) for **2** or 2 equivalents of  $\text{Cp}_3\text{Gd}^{\text{III}}$  (32 mg, 0.084 mmol) for **3** or 2 equivalents of  $\text{Cp}_3\text{Nd}^{\text{III}}$  (32 mg, 0.084 mmol) for **4**. Solutions were stirred additionally during 24 hours at 60°C. Color of the solution changed to dark green. It was cooled down to room temperature and filtered into the glass tube. Slow mixing of the obtained solution with *n*-hexane during 1.5 months produced black blocks in 56, 61 and 48% yield, respectively. Composition of **2** was determined from X-ray diffraction on single crystal. Testing of several crystals from the synthesis showed that all of them belong to one crystal phase (Table S1). It should also be noted that all crystals in the synthesis of **2** had the same shape and color. The same situation was observed for crystals of **3** whose composition was also determined from X-ray diffraction on single crystals (Table S1). Crystals obtained in the synthesis of **4** had the same shape and color and their testing by X-ray diffraction showed that these crystals are isostructural to **3** (Table S2). Therefore, they have the same composition as **3** that was confirmed by elemental analysis:  $\text{C}_{124}\text{H}_{134}\text{Cl}_8\text{Nd}_2\text{K}_2\text{MnN}_{14}\text{O}_{12}$ ,  $M_r = 2713.66 \text{ g mol}^{-1}$ : Calcd. C = 54.88, H = 4.94, N = 7.22, Cl = 10.46%; Found: C = 54.22, H = 4.52, N = 7.08, Cl = 10.16%.

Crystals of  $\{\text{Cryptand}(\text{K}^+)\}_2\{\text{Fe}^{\text{II}}(\text{CN})_2\text{Pc}\cdot(\text{Cp}_3\text{Nd}^{\text{III}})_2\}^{2-}\cdot 4\text{C}_6\text{H}_4\text{Cl}_2$  (**6**) were obtained via the  $\{\text{Cryptand}(\text{K}^+)\}_2\{\text{Fe}^{\text{II}}(\text{CN})_2\text{Pc}\}^{2-}$  salt. Solution of this salt was obtained by cyanation of  $\text{Fe}^{\text{II}}\text{Pc}$  (24 mg, 0.042 mmol) with an excess of KCN (30 mg, 0.46 mmol) in the presence of two equivalents of cryptand[2.2.2] (32 mg, 0.084 mmol) in *o*-dichlorobenzene upon stirring the solution at 60°C during one day. Phthalocyanines completely dissolved to form deep green solution. It was cooled down to room temperature and filtered into the flask containing 2 equivalents of  $\text{Cp}_3\text{Nd}^{\text{III}}$  (32 mg, 0.084 mmol). Solutions were stirred additionally during 24 hours at 60°C. Color of the solution remained unchanged preserving green color. The solution was cooled down to room temperature and filtered into the glass tube. Slow mixing with *n*-hexane during 1.5 months produced black blocks in 42% yield. Crystals obtained in the synthesis of **6** had the same shape and their testing by X-ray diffraction showed that they are isostructural to **3** (Table S2). Therefore, they have the same composition as **3** that was confirmed by elemental analysis:  $\text{C}_{124}\text{H}_{134}\text{Cl}_8\text{Nd}_2\text{K}_2\text{FeN}_{14}\text{O}_{12}$ ,  $M_r = 2714.56 \text{ g mol}^{-1}$ : Calcd. C = 54.86, H = 4.94, N =

7.22, Cl = 10.46%; Found: C = 54.47, H = 4.31, N = 7.14, Cl = 10.04%. Small deviation of the content of C, H from the calculated values can be explained by high-air sensitivity of tris(cyclopentadienyl)lanthanides.

Crystals of  $\{\text{Cryptand}(\text{K}^+)\}_2\{\text{Fe}^{\text{II}}(\text{CN})_2(\text{PcCl}_{16})\}^{2-}\cdot 2\text{C}_6\text{H}_4\text{Cl}_2$  (**7**) were obtained by cyanation of  $\text{Fe}^{\text{II}}(\text{PcCl}_{16})$  (47 mg, 0.042 mmol) with an excess of KCN (30 mg, 0.46 mmol) in the presence of two equivalents of cryptand[2.2.2] (32 mg, 0.084 mmol) in *o*-dichlorobenzene upon stirring the solution at 60°C during one day. Phthalocyanine completely dissolved to form deep green solution. It was cooled down to room temperature and filtered into the glass tube. Slow mixing with *n*-hexane during 1.5 months produced black blocks in 54% yield. All crystals obtained in the synthesis of **7** had the same shape and their composition was determined from X-ray diffraction on single crystal. Several crystals tested from the synthesis have the same unit cell parameters (Table S1).

Crystals of  $\{\text{Cryptand}(\text{K}^+)\}_2\{\text{Fe}^{\text{II}}(\text{CN})_2(\text{PcCl}_{16})\cdot(\text{Cp}_3\text{Nd}^{\text{III}})_2\}^{2-}\cdot\text{C}_6\text{H}_4\text{Cl}_2$  (**7**) were obtained via the  $\{\text{Cryptand}(\text{K}^+)\}_2\{\text{Fe}^{\text{II}}(\text{CN})_2(\text{PcCl}_{16})\}^{2-}$  salt. Solution of this salt was obtained by cyanation of  $\text{Fe}^{\text{II}}(\text{PcCl}_{16})$  (47 mg, 0.042 mmol) with an excess of KCN (30 mg, 0.46 mmol) in the presence of two equivalents of cryptand[2.2.2] (32 mg, 0.084 mmol) in *o*-dichlorobenzene upon stirring the solution at 60°C during one day. Phthalocyanine completely dissolved to form deep green solution. It was cooled down to room temperature and filtered into the flask containing 2 equivalents of  $\text{Cp}_3\text{Nd}^{\text{III}}$  (32 mg, 0.084 mmol). Solutions were stirred additionally during 24 hours at 60°C. Color of the solution remained unchanged. Solution was cooled down to room temperature and filtered into the glass tube. Slow mixing with *n*-hexane during 1.5 months produced black blocks in 71% yield. Crystals obtained in the synthesis of **7** had the same shape and their composition was determined from X-ray diffraction on single crystal. Several crystals tested from the synthesis have the same unit cell parameters (Table S1).

### **X-ray crystal structure determination**

X-ray diffraction data for **1-8** are listed in Tables S1 and S2. X-ray diffraction data for **2, 3, 5, 7,** and **8** were collected on an Oxford diffraction "Gemini-R" CCD diffractometer with graphite monochromated  $\text{MoK}_\alpha$  radiation using an Oxford Instrument Cryojet system. Raw data reduction

to  $F^2$  was carried out using CrysAlisPro, Oxford Diffraction Ltd. The structures were solved by direct method and refined by the full-matrix least-squares method against  $F^2$  using SHELX-2018/3.<sup>2</sup> Non-hydrogen atoms were refined anisotropically. Positions of hydrogen atoms were included into refinement in a riding model. Crystal structure of **2** contains only half independent  $\{\text{Mn}^{\text{II}}(\text{CN})_2\text{Pc}\cdot(\text{Mn}^{\text{II}}(\text{acac})_2)_2\}^{2-}$  dianion, one independent  $\{\text{Cryptand}[2.2.2](\text{K}^+)\}$  cation and 2.5 independent  $\text{C}_6\text{H}_4\text{Cl}_2$  molecules. Among solvent molecules one molecule is fully ordered, another molecule is disordered between two orientations with 0.771(2)/0.229(2) occupancies and a third molecule is positioned in the inversion center and has only 0.5 occupancy. Crystal structure of **3** contains only half independent  $\{\text{Mn}^{\text{II}}(\text{CN})_2\text{Pc}\cdot(\text{Cp}_3\text{Gd}^{\text{III}})_2\}^{2-}$  dianion, one independent  $\{\text{Cryptand}[2.2.2](\text{K}^+)\}$  cation and two independent  $\text{C}_6\text{H}_4\text{Cl}_2$  molecules. Among solvent molecules one molecule is fully ordered, whereas another molecule is disordered between two orientations with 0.6507(18)/0.3493(18) occupancies. Crystal structure of complex **5** is isostructural to previously described complex  $\{\text{Cryptand}(\text{K}^+)\}_2\{\text{Sn}^{\text{II}}(\text{NC})_2\text{Pc}\}^{2-}\cdot\text{C}_6\text{H}_4\text{Cl}_2$ <sup>1</sup>. As a result, complex **2** also contains position occupied by strongly disordered  $\text{C}_6\text{H}_4\text{Cl}_2$  molecules which were squeezed by standard Olex2 routine. According to the estimated electron density the content of  $\text{C}_6\text{H}_4\text{Cl}_2$  is slightly smaller than 1 (0.72). The reason of that can be the loose of solvent during the storage of crystals. Crystal structure of **7** contains only half independent  $(\text{Cryptand}[2.2.2](\text{K}^+))_2\{\text{Fe}^{\text{II}}(\text{CN})_2\text{PcCl}_{16}\}^{2-}$  unit and one independent  $\text{C}_6\text{H}_4\text{Cl}_2$  molecule which is disordered between two orientations with 0.6065(17)/0.3935(17) occupancies. Crystal structure of **8** contains one independent  $\{\text{Fe}^{\text{II}}(\text{CN})_2(\text{PcCl}_{16})\cdot(\text{Cp}_3\text{Nd}^{\text{III}})_2\}^{2-}$  dianion, two independent ordered  $\{\text{Cryptand}[2.2.2](\text{K}^+)\}$  cations and one independent  $\text{C}_6\text{H}_4\text{Cl}_2$  molecule which is disordered between two orientations with 0.507(4)/0.493(4) occupancies. To keep anisotropic thermal parameters of the disordered fragments, the displacement components were restrained using SHELXL instructions of ISOR, SIMU and DELU. That resulted in the use of some amount of restraints for the refinement of crystal structures of **2**, **3**, **5**, **7** and **8**: 18, 54, 288, 276 and 832, respectively.

**Table S1.** Crystallographic data and some details of the data collection and refinement for **2**, **3**, **7** and **8**.

| Compound                                                                                                           | <b>2</b>                                                                                                             | <b>3</b>                                                                                                              | <b>5</b>                                                                                                   | <b>7</b>                                                                                             | <b>8</b>                                                                                                               |
|--------------------------------------------------------------------------------------------------------------------|----------------------------------------------------------------------------------------------------------------------|-----------------------------------------------------------------------------------------------------------------------|------------------------------------------------------------------------------------------------------------|------------------------------------------------------------------------------------------------------|------------------------------------------------------------------------------------------------------------------------|
| Empirical formula                                                                                                  | C <sub>120</sub> H <sub>136</sub> Cl <sub>10</sub> K <sub>2</sub><br>Mn <sub>3</sub> N <sub>14</sub> O <sub>20</sub> | C <sub>124</sub> H <sub>134</sub> Cl <sub>8</sub> Gd <sub>2</sub><br>K <sub>2</sub> MnN <sub>14</sub> O <sub>12</sub> | C <sub>74.3</sub> Cl <sub>1.4</sub> Fe H <sub>90.9</sub><br>K <sub>2</sub> N <sub>14</sub> O <sub>12</sub> | C <sub>82</sub> H <sub>80</sub> Cl <sub>20</sub> FeK <sub>2</sub><br>N <sub>14</sub> O <sub>12</sub> | C <sub>106</sub> H <sub>106</sub> Cl <sub>18</sub> FeK <sub>2</sub><br>N <sub>14</sub> Nd <sub>2</sub> O <sub>12</sub> |
| M <sub>r</sub> [g·mol <sup>-1</sup> ]                                                                              | 2691.94                                                                                                              | 2743.68                                                                                                               | 1563.13                                                                                                    | 2296.65                                                                                              | 2828.67                                                                                                                |
| Crystal color and shape,                                                                                           | Dark black<br>block                                                                                                  | Dark black<br>block                                                                                                   | Dark black<br>block                                                                                        | Dark black<br>block                                                                                  | Dark black<br>block                                                                                                    |
| Crystal system                                                                                                     | Monoclinic                                                                                                           | Triclinic                                                                                                             | Triclinic                                                                                                  | Monoclinic                                                                                           | Triclinic                                                                                                              |
| Space group                                                                                                        | <i>P</i> 2 <sub>1</sub> / <i>n</i>                                                                                   | <i>P</i> $\bar{1}$                                                                                                    | <i>P</i> $\bar{1}$                                                                                         | <i>P</i> 2 <sub>1</sub> / <i>n</i>                                                                   | <i>P</i> $\bar{1}$                                                                                                     |
| <i>a</i> , Å                                                                                                       | 16.7101(5)                                                                                                           | 13.9492(3)                                                                                                            | 12.7789(6)                                                                                                 | 13.1832(1)                                                                                           | 16.2343(3)                                                                                                             |
| <i>b</i> , Å                                                                                                       | 18.1789(4)                                                                                                           | 14.2598(2)                                                                                                            | 13.5071(8)                                                                                                 | 19.5040(2)                                                                                           | 19.4760(5)                                                                                                             |
| <i>c</i> , Å                                                                                                       | 22.3440(7)                                                                                                           | 17.5018(3)                                                                                                            | 13.6608(8)                                                                                                 | 19.3262(2)                                                                                           | 20.9495(6)                                                                                                             |
| $\alpha$ , °                                                                                                       | 90                                                                                                                   | 73.112(2)                                                                                                             | 111.912(6)                                                                                                 | 90                                                                                                   | 108.677(3)                                                                                                             |
| $\beta$ , °                                                                                                        | 107.465(3)                                                                                                           | 78.193(2)                                                                                                             | 111.362(5)                                                                                                 | 102.044(1)                                                                                           | 95.219(2)                                                                                                              |
| $\gamma$ , °                                                                                                       | 90                                                                                                                   | 67.321(2)                                                                                                             | 94.970(4)                                                                                                  | 90                                                                                                   | 110.988(2)                                                                                                             |
| <i>V</i> , Å <sup>3</sup>                                                                                          | 6474.6(3)                                                                                                            | 3056.67(11)                                                                                                           | 1968.5(2)                                                                                                  | 4859.87(8)                                                                                           | 5698.1(3)                                                                                                              |
| <i>Z</i>                                                                                                           | 2                                                                                                                    | 1                                                                                                                     | 1                                                                                                          | 2                                                                                                    | 2                                                                                                                      |
| $\rho_{\text{calc}}$ [g/cm <sup>3</sup> ]                                                                          | 1.381                                                                                                                | 1.491                                                                                                                 | 1.319                                                                                                      | 1.569                                                                                                | 1.649                                                                                                                  |
| $\mu$ [mm <sup>-1</sup> ]                                                                                          | 0.628                                                                                                                | 1.483                                                                                                                 | 0.399                                                                                                      | 0.856                                                                                                | 1.585                                                                                                                  |
| <i>F</i> (000)                                                                                                     | 2794                                                                                                                 | 1399                                                                                                                  | 823                                                                                                        | 2340                                                                                                 | 1649                                                                                                                   |
| <i>T</i> [K]                                                                                                       | 109(2)                                                                                                               | 106(2)                                                                                                                | 150(2)                                                                                                     | 111(2)                                                                                               | 101(2)                                                                                                                 |
| 2 $\theta$ , °                                                                                                     | 52.000                                                                                                               | 52.000                                                                                                                | 59.068                                                                                                     | 59.380                                                                                               | 52.000                                                                                                                 |
| Reflns measured                                                                                                    | 74099                                                                                                                | 36115                                                                                                                 | 36467                                                                                                      | 52980                                                                                                | 60835                                                                                                                  |
| Unique reflns                                                                                                      | 12731                                                                                                                | 12027                                                                                                                 | 9677                                                                                                       | 12195                                                                                                | 22320                                                                                                                  |
| Params/Restraints                                                                                                  | 762/18                                                                                                               | 791/54                                                                                                                | 448/288                                                                                                    | 665/276                                                                                              | 1467/832                                                                                                               |
| Reflns [ <i>F</i> <sub>o</sub> >2 $\sigma$ ( <i>F</i> <sub>o</sub> )]                                              | 9592                                                                                                                 | 11622                                                                                                                 | 3132                                                                                                       | 10260                                                                                                | 16309                                                                                                                  |
| <i>R</i> <sub>1</sub> [ <i>F</i> <sub>o</sub> >2 $\sigma$ ( <i>F</i> <sub>o</sub> )]/ <i>wR</i> <sub>2</sub> (all) | 0.0594/0.1461                                                                                                        | 0.0259/0.0647                                                                                                         | 0.1261/0.4374                                                                                              | 0.0314/0.0784                                                                                        | 0.0775/0.1275                                                                                                          |
| G.O.F                                                                                                              | 1.043                                                                                                                | 1.043                                                                                                                 | 1.065                                                                                                      | 1.016                                                                                                | 1.152                                                                                                                  |
| CCDC number                                                                                                        | 2117285                                                                                                              | 2117286                                                                                                               | 2161670                                                                                                    | 2117284                                                                                              | 2117330                                                                                                                |

**Table S2.** Unit cell parameters determined for the structures of reference salt and compounds **1**, **4** and **6**.

| Compound                  | {Cryptand(K <sup>+</sup> )} <sub>2</sub><br>{Sn <sup>II</sup> (NC) <sub>2</sub> Pc} <sup>2-</sup><br>·C <sub>6</sub> H <sub>4</sub> Cl <sub>2</sub> <sup>1</sup> | <b>1</b>           | <b>4</b>           | <b>6</b>           |
|---------------------------|------------------------------------------------------------------------------------------------------------------------------------------------------------------|--------------------|--------------------|--------------------|
| Crystal system            | Triclinic                                                                                                                                                        | Triclinic          | Triclinic          | Triclinic          |
| Space group               | <i>P</i> $\bar{1}$                                                                                                                                               | <i>P</i> $\bar{1}$ | <i>P</i> $\bar{1}$ | <i>P</i> $\bar{1}$ |
| <i>a</i> , Å              | 12.7619(3)                                                                                                                                                       | 12.80(2)           | 14.10(2)           | 13.945(8)          |
| <i>b</i> , Å              | 13.3263(3)                                                                                                                                                       | 13.43(2)           | 14.50(2)           | 14.574(8)          |
| <i>c</i> , Å              | 14.0032(3)                                                                                                                                                       | 14.11(2)           | 17.83(2)           | 17.793(9)          |
| $\alpha$ , °              | 63.247(2)                                                                                                                                                        | 62.41(8)           | 74.27(12)          | 74.64(5)           |
| $\beta$ , °               | 74.649(2)                                                                                                                                                        | 74.42(8)           | 78.20(11)          | 77.99(5)           |
| $\gamma$ , °              | 67.758(2)                                                                                                                                                        | 67.78(8)           | 67.18(14)          | 67.38(5)           |
| <i>V</i> , Å <sup>3</sup> | 1955.49(9)                                                                                                                                                       | 1978(8)            | 3213(8)            | 3196(3)            |
| <i>T</i> , K              | 120                                                                                                                                                              | 250                | 250                | 250                |



**Table S3.** IR spectra of starting compounds and complexes 1-4.

| Components                                             | Cp <sub>3</sub> Nd <sup>III</sup>                                           | Mn <sup>II</sup><br>(acac) <sub>2</sub>                                                                    | Cryptand<br>[2.2.2]                                                                                                                                                                     | {Cryptand(K)} <sub>2</sub><br>{Mn <sup>II</sup> (CN) <sub>2</sub> Pc}<br>·C <sub>6</sub> H <sub>4</sub> Cl <sub>2</sub> (1)                                                                                                             | {Cryptand(K)} <sub>2</sub><br>·{[Mn <sup>II</sup> (acac) <sub>2</sub> ] <sub>2</sub><br>Mn <sup>II</sup> (CN) <sub>2</sub> Pc}<br>·5C <sub>6</sub> H <sub>4</sub> Cl <sub>2</sub> (2)                                                        | {Cryptand(K)} <sub>2</sub><br>·{(Cp <sub>3</sub> Gd <sup>III</sup> ) <sub>2</sub><br>Mn <sup>II</sup> (CN) <sub>2</sub> Pc}<br>·4C <sub>6</sub> H <sub>4</sub> Cl <sub>2</sub> (3)                                                      | {Cryptand(K)} <sub>2</sub><br>{(Cp <sub>3</sub> Nd <sup>III</sup> ) <sub>2</sub><br>Mn <sup>II</sup> (CN) <sub>2</sub> Pc}<br>·4C <sub>6</sub> H <sub>4</sub> Cl <sub>2</sub> (4)                                            |
|--------------------------------------------------------|-----------------------------------------------------------------------------|------------------------------------------------------------------------------------------------------------|-----------------------------------------------------------------------------------------------------------------------------------------------------------------------------------------|-----------------------------------------------------------------------------------------------------------------------------------------------------------------------------------------------------------------------------------------|----------------------------------------------------------------------------------------------------------------------------------------------------------------------------------------------------------------------------------------------|-----------------------------------------------------------------------------------------------------------------------------------------------------------------------------------------------------------------------------------------|------------------------------------------------------------------------------------------------------------------------------------------------------------------------------------------------------------------------------|
| Mn <sup>II</sup> (CN) <sub>2</sub> (Pc <sup>2-</sup> ) |                                                                             |                                                                                                            |                                                                                                                                                                                         | 435w<br>510w<br>570w<br>727s*<br>751s*<br>765m<br>821w<br>828w 832w<br>932m*<br>951s*<br>1002w<br>1058m<br>1078s*<br>1117vs*<br>1164s<br>1262m<br>1290m<br>1330m*<br>1419m<br>1466w*<br>1478m<br>1496s*<br>1582w<br>2094m (CN)<br>3054w | 434w*<br>511w<br>570w<br>728s*<br>751s*<br>767m*<br>820w<br>833w<br>934m*<br>950s*<br>1003w<br>1059m<br>1080s*<br>1116vs*<br>1163m<br>1257m<br>1288m* 1297m<br>1331w*<br>1419s<br>1457m*<br>1478m<br>1498s*<br>1594s*<br>2098m (CN)<br>3052w | 433w<br>510w<br>570w<br>729s*<br>751s*<br>769m<br>820w<br>831w<br>933m<br>949s<br>1004w<br>1059m<br>1081s<br>1116vs*<br>1164m<br>1259m<br>1288m* 1296m*<br>1330m*<br>1418m<br>1457w*<br>1478m<br>1498s*<br>1584w<br>2097m (CN)<br>3054w | 432w<br>511w<br>571w<br>729s*<br>752s*<br>767m<br>820w<br>831w<br>931m<br>950s*<br>-<br>1059m<br>1080s*<br>1118vs*<br>1163m<br>1259m<br>1288m* 1297m*<br>1331w*<br>1420m<br>1457m*<br>1478m<br>1499s*<br>1584w<br>2098m (CN) |
| Cryptand(K <sup>+</sup> )                              |                                                                             |                                                                                                            | 476w<br>528w<br>581w<br>735m<br>922m<br>948w<br>982m<br>1038w<br>1071m<br>1100s<br>1127s<br>1213w<br>-<br>1290m<br>1329m<br>1360s<br>1446m<br>1462m<br>1490w<br>2790w<br>2877w<br>2943w | 476w<br>523w<br>-<br>727s*<br>920w<br>951s*<br>-<br>1034w*<br>1078s*<br>1102vs<br>1117vs*<br>1240w<br>1290w<br>1330m*<br>1355m*<br>1444w<br>1466w*<br>1496s*<br>2810w<br>2873w<br>2954w                                                 | 476w<br>524w<br>-<br>728s*<br>920w<br>950s*<br>-<br>1032w*<br>1080s*<br>1105vs<br>1116vs<br>1240w<br>1288m* 1297m*<br>1331w*<br>1354m 1360m<br>-<br>1457m*<br>1498s*<br>2815w<br>2883w<br>2959w                                              | -<br>522w<br>-<br>729s*<br>916w<br>949s<br>-<br>1032w*<br>1081s*<br>1104vs<br>1116vs*<br>1240w<br>1288m* 1296m*<br>1330m*<br>1354s 1360s<br>1445w*<br>1457w*<br>1498s*<br>2812w<br>2883m<br>2957w                                       | -<br>524w<br>-<br>729s*<br>-<br>950s*<br>-<br>1033m*<br>1080s*<br>1104vs<br>1118vs*<br>1240w<br>1288m* 1297m*<br>1331m*<br>1354m 1361m<br>1444w*<br>1457m*<br>1499s*<br>2812w<br>2883m<br>2957w                              |
| Metal fragment                                         | 753s<br>882w<br>1005s<br>1070w<br>1123w<br>1264w<br>1340w<br>1440w<br>3085w | 406w<br>446m<br>544m<br>646w<br>769w<br>918w<br>937w<br>1013w<br>1192w<br>1252s<br>1362s<br>1506s<br>1601s |                                                                                                                                                                                         |                                                                                                                                                                                                                                         | Mn <sup>II</sup> (acac) <sub>2</sub><br>408w<br>434w*<br>544w<br>-<br>767m*<br>920w<br>934m*<br>1015w<br>1189w<br>1257m*<br>1360m<br>1512s<br>1594s*                                                                                         | Cp <sub>3</sub> Gd <sup>III</sup><br>751s*<br>884w<br>1013m<br>1081s*<br>1131w<br>1260m<br>1330m*<br>1445w*<br>3080w                                                                                                                    | Cp <sub>3</sub> Nd <sup>III</sup><br>752s*<br>882w<br>1013m<br>1080s*<br>1133w<br>1258m<br>1331w*<br>1444w*<br>3080w                                                                                                         |
| C <sub>6</sub> H <sub>4</sub> Cl <sub>2</sub>          |                                                                             |                                                                                                            |                                                                                                                                                                                         | 659w<br>751s*<br>1034w*<br>1455m                                                                                                                                                                                                        | 658w<br>751s*<br>1032w*<br>1457m*                                                                                                                                                                                                            | 664w<br>751s*<br>1032w*<br>1457w*                                                                                                                                                                                                       | 658w<br>751s*<br>1033m*<br>1457m*                                                                                                                                                                                            |

\*- bands are coincided; w – weak intensity, m –middle intensity, s – strong intensity; vs- very strong

**Table S4.** IR spectra of obtained complexes **5-8**.

| Components                                                                                 | {Cryptand(K)} <sub>2</sub><br>{Fe <sup>II</sup> (CN) <sub>2</sub> Pc}<br>·C <sub>6</sub> H <sub>4</sub> Cl <sub>2</sub> ( <b>5</b> )                                                                                | {Cryptand(K)} <sub>2</sub><br>{(Cp <sub>3</sub> Nd <sup>III</sup> ) <sub>2</sub><br>Fe <sup>II</sup> (CN) <sub>2</sub> Pc}<br>·4C <sub>6</sub> H <sub>4</sub> Cl <sub>2</sub> ( <b>6</b> )                                                                                                           | {Cryptand(K)} <sub>2</sub><br>{Fe <sup>II</sup> (CN) <sub>2</sub> (PcCl <sub>16</sub> )}<br>·2C <sub>6</sub> H <sub>4</sub> Cl <sub>2</sub> ( <b>7</b> )                                                                                                        | {Cryptand(K)} <sub>2</sub><br>{(Cp <sub>3</sub> Nd <sup>III</sup> ) <sub>2</sub><br>Fe <sup>II</sup> (CN) <sub>2</sub> (PcCl <sub>16</sub> )}<br>·C <sub>6</sub> H <sub>4</sub> Cl <sub>2</sub> ( <b>8</b> )                                                           |
|--------------------------------------------------------------------------------------------|---------------------------------------------------------------------------------------------------------------------------------------------------------------------------------------------------------------------|------------------------------------------------------------------------------------------------------------------------------------------------------------------------------------------------------------------------------------------------------------------------------------------------------|-----------------------------------------------------------------------------------------------------------------------------------------------------------------------------------------------------------------------------------------------------------------|------------------------------------------------------------------------------------------------------------------------------------------------------------------------------------------------------------------------------------------------------------------------|
| Fe <sup>II</sup> (CN) <sub>2</sub> (Pc <sup>2-</sup> or PcCl <sub>16</sub> <sup>2-</sup> ) | 432w<br>572w<br>734s*<br>753s*<br>773m<br>820w<br>831w<br>932m<br>948m*<br>-<br>1004w<br>1079m*<br>1164m<br>1260m<br>1290m*<br>1354s*<br>1360m<br>1421s<br>1457m*<br>1477m<br>1510s<br>1587w<br>2093m (CN)<br>3053w | 433w<br>571w<br>734s*<br>752s*<br>775m<br>820w<br>830w<br>932m<br>950m*<br>-<br>-<br>1078m<br>1164m<br>1260m<br>1287m* 1296m*<br>1353m*<br>1354s* 1361s*<br>1421m<br>1457w*<br>1476w<br>1511s<br>1587w<br>2091m (CN)<br>3052w                                                                        | 435w<br>505s<br>605w<br>755s<br>760s<br>772s<br>820w<br>830w<br>932m<br>950m*<br>1079m<br>1160s 1167s<br>1218w<br>1260m 1274m<br>1297s* 1308s 1316s*<br>1350m 1358m<br>1390m<br>1455m*<br>1474m<br>1507s<br>1540s<br>1602w<br>2099m (CN)<br>2105w (CN)<br>3059w | 437w<br>509m<br>607w<br>752s* 756s<br>760s 764s<br>773s<br>825w<br>-<br>931m<br>948s*<br>1079m*<br>1158s<br>1210w<br>1260m* 1272m<br>1299s* 1310s 1319w*<br>1353m* 1360m<br>1389m<br>1454m*<br>1477m<br>1507s<br>1539m<br>1599w<br>2097 s (CN)<br>2114w (CN)<br>3058 w |
| Cryptand(K <sup>+</sup> )                                                                  | -<br>523w<br>734s*<br>916w<br>948m<br>-<br>1033w*<br>1079m*<br>1101vs<br>1117vs<br>1239w<br>1290m*<br>1332m*<br>1354s*<br>-<br>1457m*<br>2811w<br>2885w<br>2955w                                                    | -<br>524w<br>734s*<br>915w<br>950m*<br>-<br>1033w*<br>1078m*<br>1101s<br>1118s<br>1240w<br>1287m* 1296m<br>1332w*<br>1354s* 1361s*<br>1445w*<br>1457w*<br>2812w<br>2881w<br>2960w<br>Cp <sub>3</sub> Nd <sup>III</sup><br>752s*<br>891w<br>1012w<br>1078m<br>-<br>1259w<br>1333w*<br>1445w*<br>3077w | -<br>-<br>-<br>915w*<br>950m*<br>-<br>1033w*<br>1078s*<br>-<br>1110vs*<br>-<br>1297s*<br>1316m*<br>1350m 1358m<br>1444w<br>1466w*<br>2808w<br>2878w<br>2957w                                                                                                    | -<br>-<br>-<br>-<br>-<br>1032*<br>1078m*<br>-<br>1105vs<br>-<br>1299s*<br>1319w*<br>1353s<br>1444w*<br>-<br>2814w<br>2881m<br>2955w<br>Cp <sub>3</sub> Nd <sup>III</sup><br>752s*<br>881w<br>1014m<br>1079m*<br>1132m<br>1260m*<br>-<br>1444w*<br>3088w                |
| Metal fragment                                                                             |                                                                                                                                                                                                                     |                                                                                                                                                                                                                                                                                                      |                                                                                                                                                                                                                                                                 |                                                                                                                                                                                                                                                                        |
| C <sub>6</sub> H <sub>4</sub> Cl <sub>2</sub>                                              | 658w<br>753s*<br>1033w*<br>1457m*                                                                                                                                                                                   | 664w<br>752s*<br>1033w<br>1457w*                                                                                                                                                                                                                                                                     | 658w<br>752s*<br>1033w*<br>1455m*                                                                                                                                                                                                                               | 656w<br>752s*<br>1032w*<br>1454m*                                                                                                                                                                                                                                      |

\* - bands are coincided; w – weak intensity, m –middle intensity, s – strong intensity

IR spectra of starting compounds and obtained complexes.

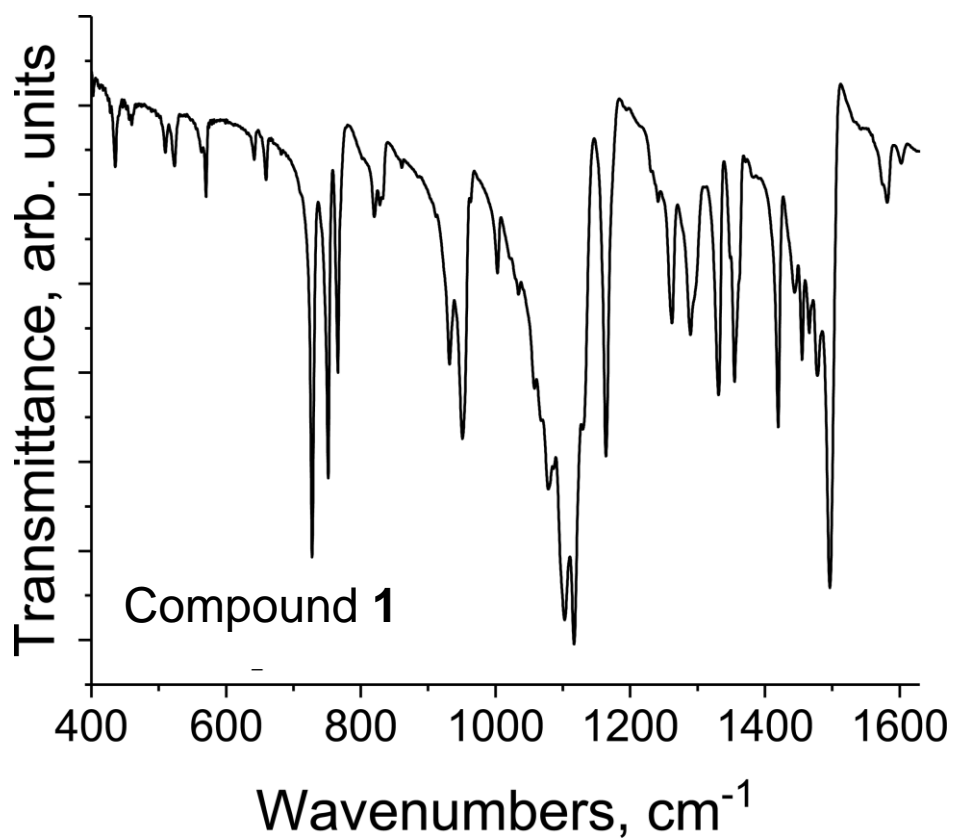

**Figure S1.** IR spectrum of  $\{\text{Cryptand}(\text{K})\}_2\{\text{Mn}^{\text{II}}(\text{CN})_2\text{Pc}\}\cdot\text{C}_6\text{H}_4\text{Cl}_2$  (**1**) in KBr pellet prepared in anaerobic conditions.

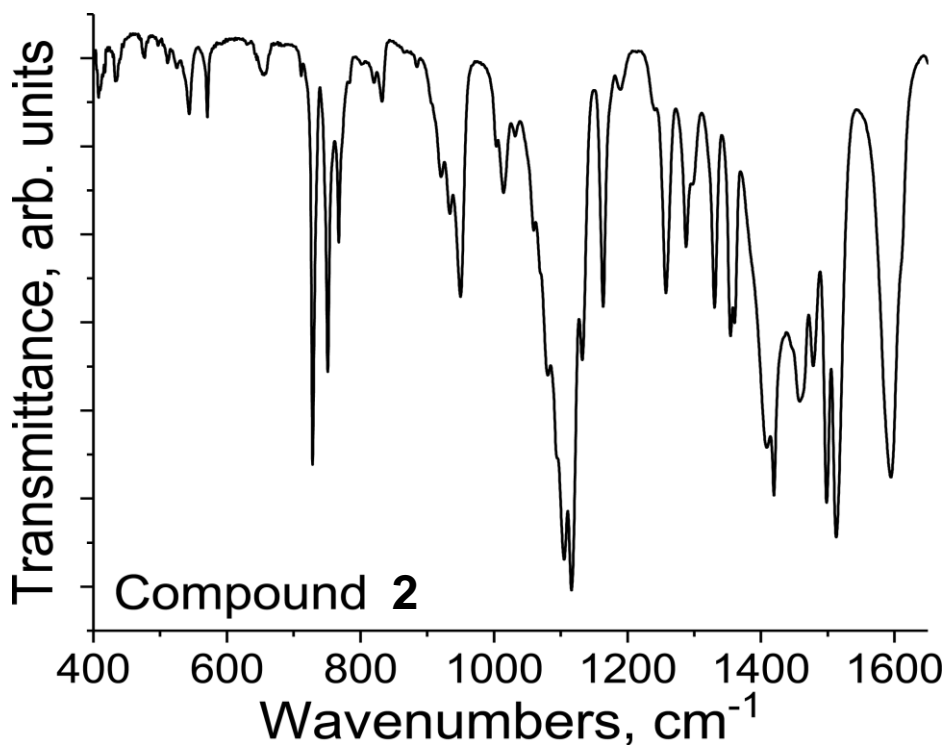

**Figure S2.** IR spectrum of  $\{\text{Cryptand(K)}\}_2 \cdot \{\text{Mn}^{\text{II}}(\text{CN})_2\text{Pc} \cdot [\text{Mn}^{\text{II}}(\text{acac})_2]_2\} \cdot 5\text{C}_6\text{H}_4\text{Cl}_2$  (**2**) in KBr pellet prepared in anaerobic conditions.

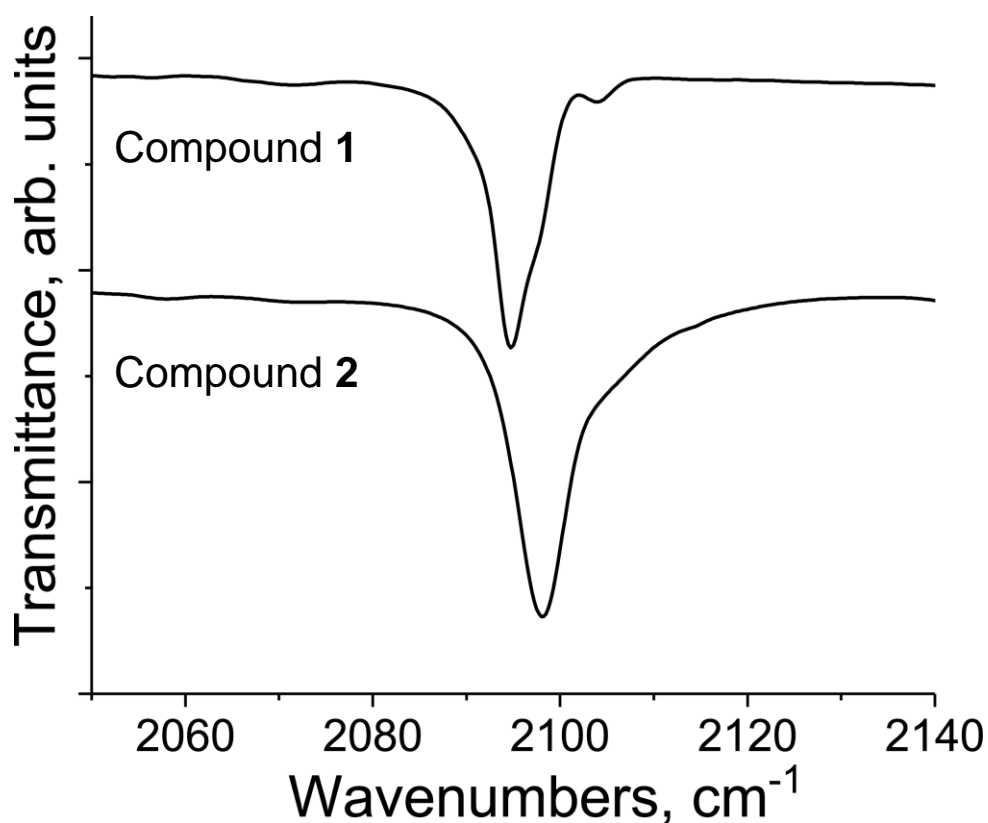

**Figure S3.** IR spectra of compounds  $\{\text{Cryptand(K)}\}_2 \cdot \{\text{Mn}^{\text{II}}(\text{CN})_2\text{Pc}\} \cdot \text{C}_6\text{H}_4\text{Cl}_2$  (**1**) and  $\{\text{Cryptand(K)}\}_2 \cdot \{\text{Mn}^{\text{II}}(\text{CN})_2\text{Pc} \cdot [\text{Mn}^{\text{II}}(\text{acac})_2]_2\} \cdot 5\text{C}_6\text{H}_4\text{Cl}_2$  (**2**) in the field of the  $\text{C}\equiv\text{N}$  vibrations (2050-2140  $\text{cm}^{-1}$ ). Spectra are measured in KBr pellets prepared in anaerobic conditions.

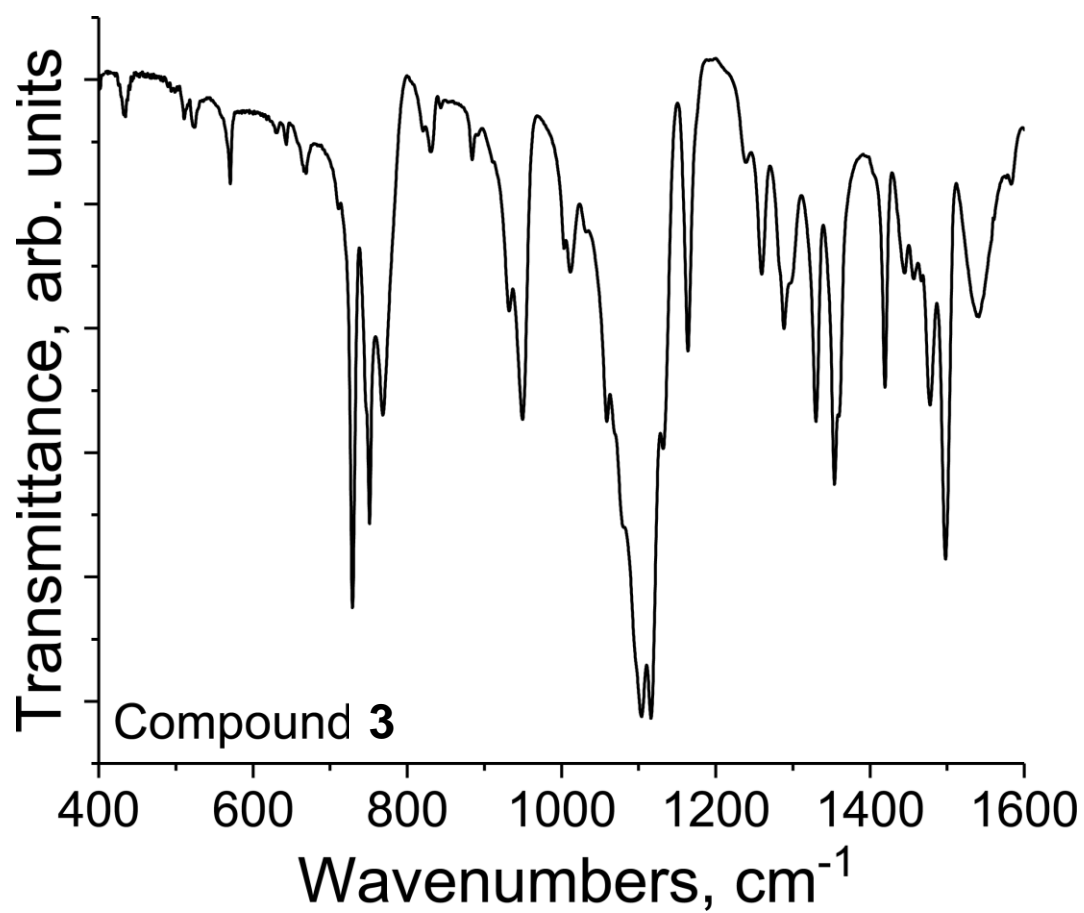

**Figure S4.** IR spectrum of  $\{\text{Cryptand(K)}\}_2\cdot\{(\text{Cp}_3\text{Gd}^{\text{III}})_2\text{Mn}^{\text{II}}(\text{CN})_2\text{Pc}\}\cdot 4\text{C}_6\text{H}_4\text{Cl}_2$  (**3**) in KBr pellet prepared in anaerobic conditions.

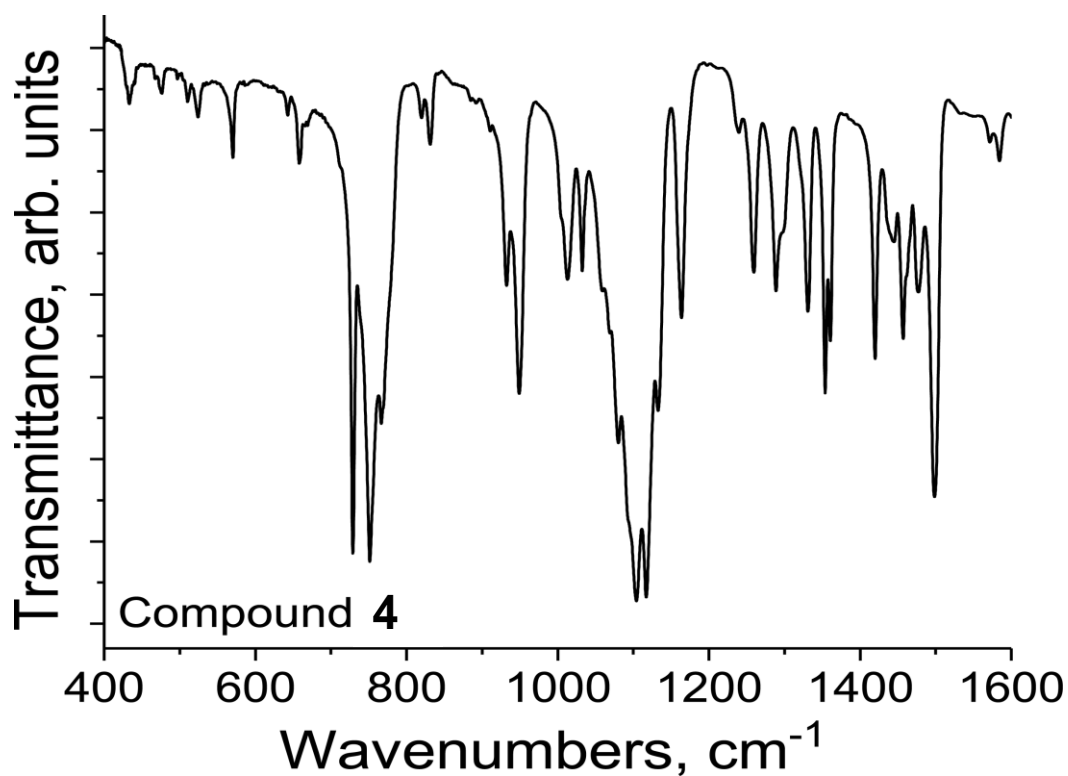

**Figure S5.** IR spectrum of  $\{\text{Cryptand}(\text{K})\}_2\{(\text{Cp}_3\text{Nd}^{\text{III}})_2\text{Mn}^{\text{II}}(\text{CN})_2\text{Pc}\}\cdot 4\text{C}_6\text{H}_4\text{Cl}_2$  (**4**) in KBr pellet prepared in anaerobic conditions.

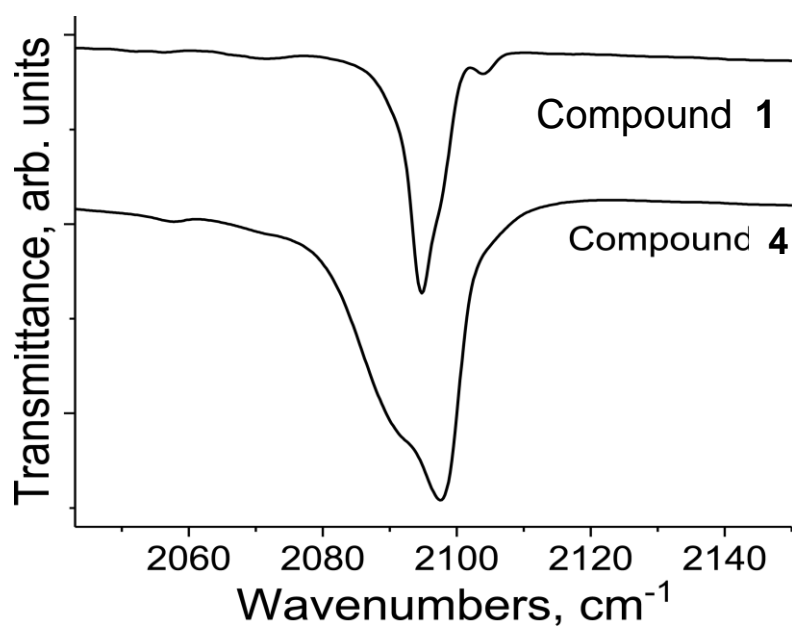

**Figure S6.** IR spectra of compounds  $\{\text{Cryptand}(\text{K})\}_2\{\text{Mn}^{\text{II}}(\text{CN})_2\text{Pc}\}\cdot \text{C}_6\text{H}_4\text{Cl}_2$  (**1**) and  $\{\text{Cryptand}(\text{K})\}_2\{(\text{Cp}_3\text{Nd}^{\text{III}})_2\text{Mn}^{\text{II}}(\text{CN})_2\text{Pc}\}\cdot 4\text{C}_6\text{H}_4\text{Cl}_2$  (**4**) in the field of the C≡N vibrations (2040-2150 cm<sup>-1</sup>). Spectra are measured in KBr pellets prepared in anaerobic conditions.

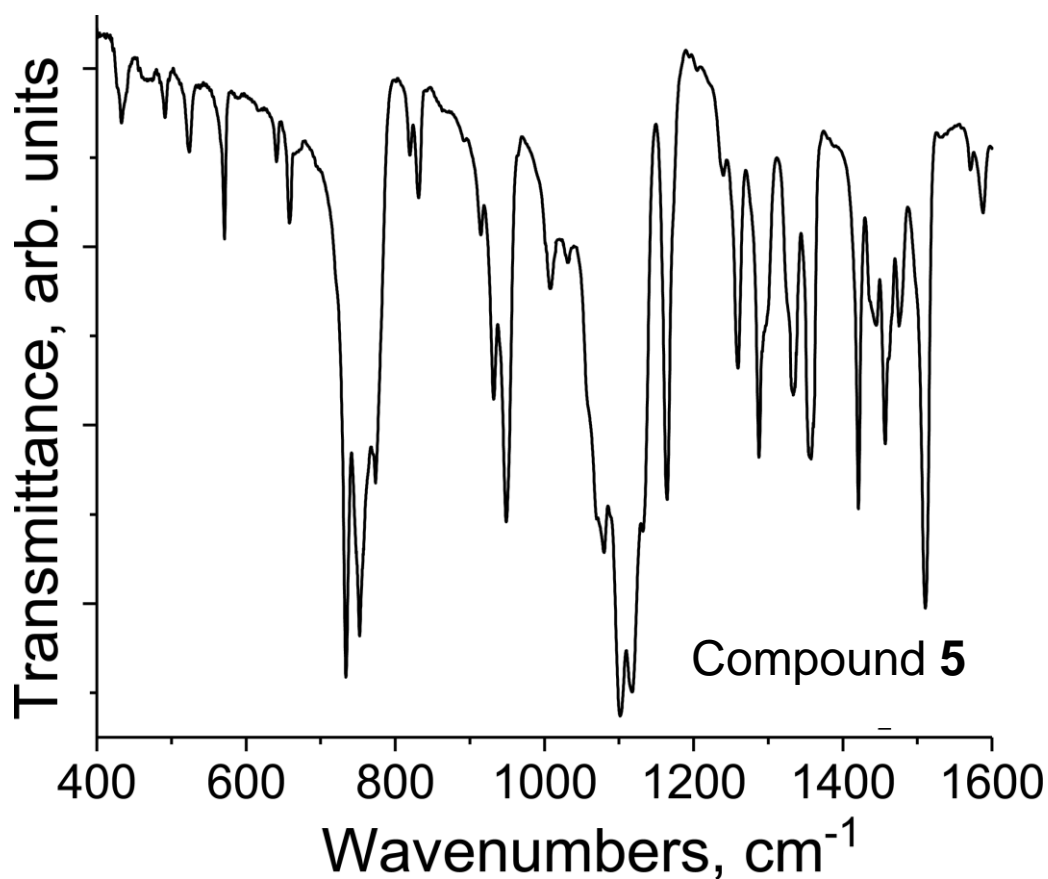

**Figure S7.** IR spectrum of compound  $\{\text{Cryptand}(\text{K})\}_2\{\text{Fe}^{\text{II}}(\text{CN})_2\text{Pc}\}\cdot\text{C}_6\text{H}_4\text{Cl}_2$  (**5**) in KBr pellet prepared in anaerobic conditions.

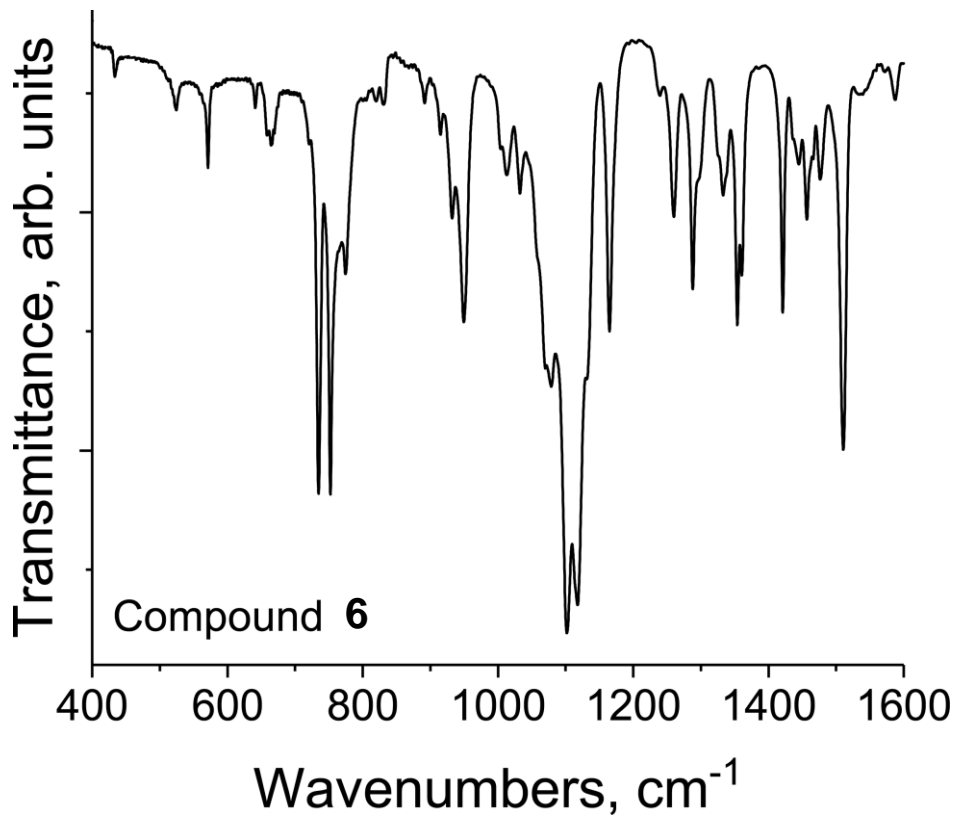

**Figure S8.** IR spectrum of  $\{\text{Cryptand}(\text{K})\}_2\{(\text{Cp}_3\text{Nd}^{\text{III}})_2\text{Fe}^{\text{II}}(\text{CN})_2\text{Pc}\}\cdot 4\text{C}_6\text{H}_4\text{Cl}_2$  (**6**) in KBr pellet prepared in anaerobic conditions.

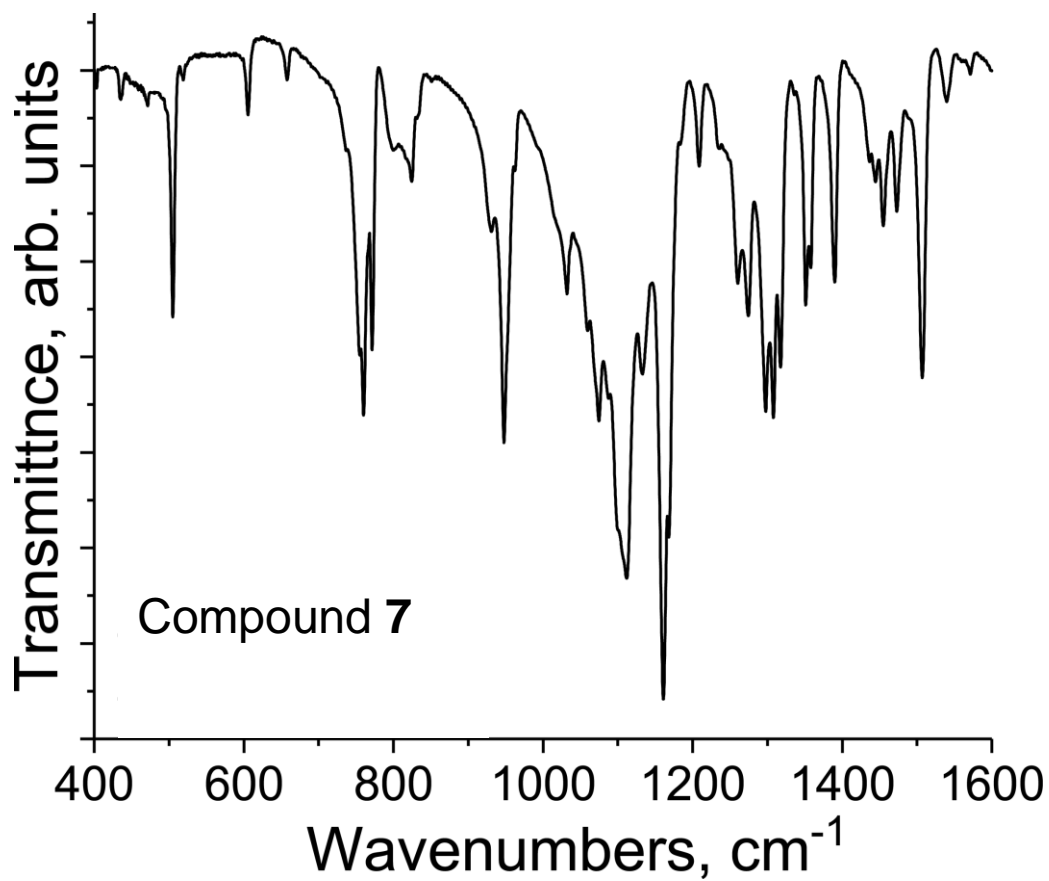

**Figure S9.** IR spectrum of compound  $\{\text{Cryptand}(\text{K})\}_2\{\text{Fe}^{\text{II}}(\text{CN})_2(\text{PcCl}_{16})\} \cdot 2\text{C}_6\text{H}_4\text{Cl}_2$  (**7**) in KBr pellet prepared in anaerobic conditions.



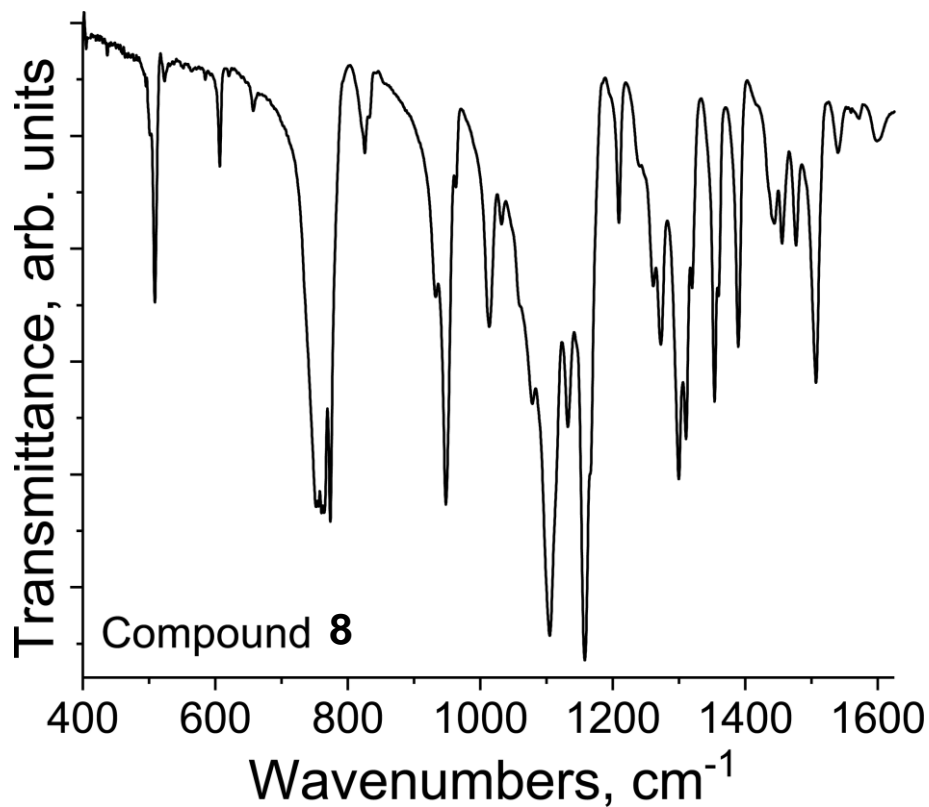

**Figure S10.** IR spectrum of compound  $\{\text{Cryptand}(\text{K})\}_2\{(\text{Cp}_3\text{Nd}^{\text{III}})_2\text{Fe}^{\text{II}}(\text{CN})_2(\text{PcCl}_{16})\}\cdot\text{C}_6\text{H}_4\text{Cl}_2$  (**8**) in KBr pellet prepared in anaerobic conditions.

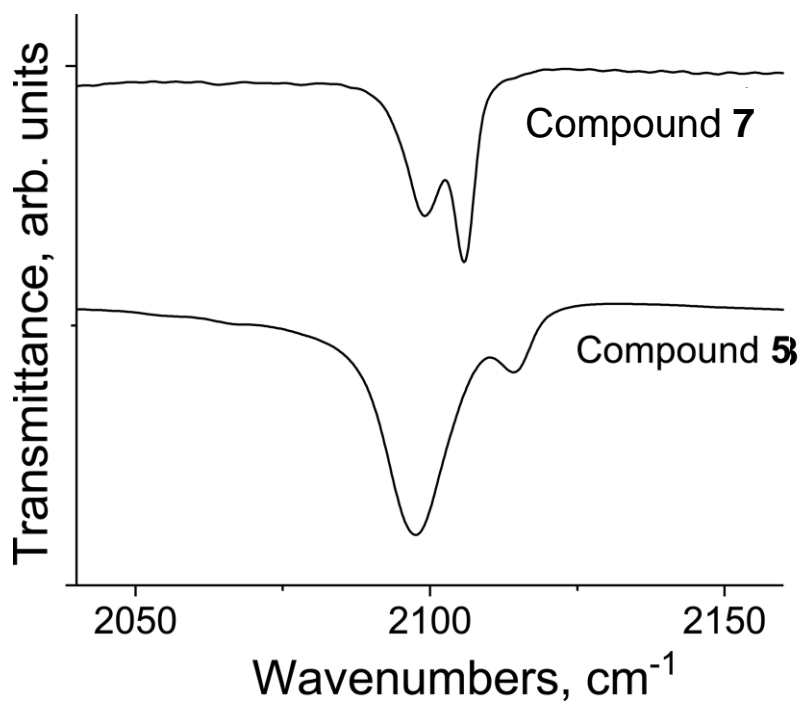

**Figure S11.** IR spectra of compounds  $\{\text{Cryptand}(\text{K})\}_2\{\text{Fe}^{\text{II}}(\text{CN})_2(\text{PcCl}_{16})\}\cdot 2\text{C}_6\text{H}_4\text{Cl}_2$  (**7**) and  $\{\text{Cryptand}(\text{K})\}_2\{(\text{Cp}_3\text{Nd}^{\text{III}})_2\text{Fe}^{\text{II}}(\text{CN})_2(\text{PcCl}_{16})\}\cdot\text{C}_6\text{H}_4\text{Cl}_2$  (**8**) in the field of the C≡N vibrations (2040-2160 cm<sup>-1</sup>). Spectra are measured in KBr pellets prepared in anaerobic conditions.

**Table S5.** Optical spectra of reference and obtained complexes.

| N        | and unit                                                                                                                                               | Soret band    | Bands at 380-570 nm               | Q-band                        |
|----------|--------------------------------------------------------------------------------------------------------------------------------------------------------|---------------|-----------------------------------|-------------------------------|
|          | Mn <sup>II</sup> Pc                                                                                                                                    | 349           | -                                 | 690, 736                      |
|          | {Cryptand(K <sup>+</sup> ) <sup>+</sup> }{Fe <sup>I</sup> (Pc <sup>2-</sup> ) <sup>-</sup> ·C <sub>6</sub> H <sub>4</sub> Cl <sub>2</sub> <sup>3</sup> | 316           | 406, 442, 477, 526, 557           | 688 (max), 822                |
| <b>1</b> | {Mn <sup>II</sup> (CN) <sub>2</sub> Pc} <sup>2-</sup>                                                                                                  | 319, 329      | 385, 400, 451, 495, 521 (sh), 568 | 598, 660 (max), 684(sh), 805  |
| <b>2</b> | {Mn <sup>II</sup> (CN) <sub>2</sub> Pc·(Mn <sup>II</sup> (acac) <sub>2</sub> ) <sub>2</sub> } <sup>2-</sup>                                            | 286, 300, 317 | 383, 443, 473, 531                | 598, 668 (max), 684 (sh), 815 |
| <b>3</b> | {Mn <sup>II</sup> (CN) <sub>2</sub> Pc·(Cp <sub>3</sub> Gd <sup>III</sup> ) <sub>2</sub> } <sup>2-</sup>                                               | 325,          | 383, 443(sh), 473, 532            | 598, 660 (max), 688, 817      |
| <b>4</b> | {Mn <sup>II</sup> (CN) <sub>2</sub> Pc·(Cp <sub>3</sub> Nd <sup>III</sup> ) <sub>2</sub> } <sup>2-</sup>                                               | 334,          | 383, 447(sh), 482, 544            | 598, 667, 687 (max), 811      |
|          | Fe <sup>II</sup> Pc                                                                                                                                    | 326           | -                                 | 670                           |
| <b>5</b> | {Fe <sup>II</sup> (CN) <sub>2</sub> Pc} <sup>2-</sup>                                                                                                  | 311, 382      | -                                 | 601, 669(max)                 |
| <b>6</b> | {Fe <sup>II</sup> (CN) <sub>2</sub> Pc·(Cp <sub>3</sub> Nd <sup>III</sup> ) <sub>2</sub> } <sup>2-</sup>                                               | 312, 388      | -                                 | 607, 672(max)                 |
| <b>7</b> | {Fe <sup>II</sup> (CN) <sub>2</sub> (PcCl <sub>16</sub> ) <sup>2-</sup>                                                                                | 336           | 427, 486                          | 624, 691(max)                 |
| <b>8</b> | {Fe <sup>II</sup> (CN) <sub>2</sub> (PcCl <sub>16</sub> )·(Cp <sub>3</sub> Nd <sup>III</sup> ) <sub>2</sub> } <sup>2-</sup>                            | 342           | 407, 458                          | 622, 687(max)                 |

### UV-visible-NIR spectra

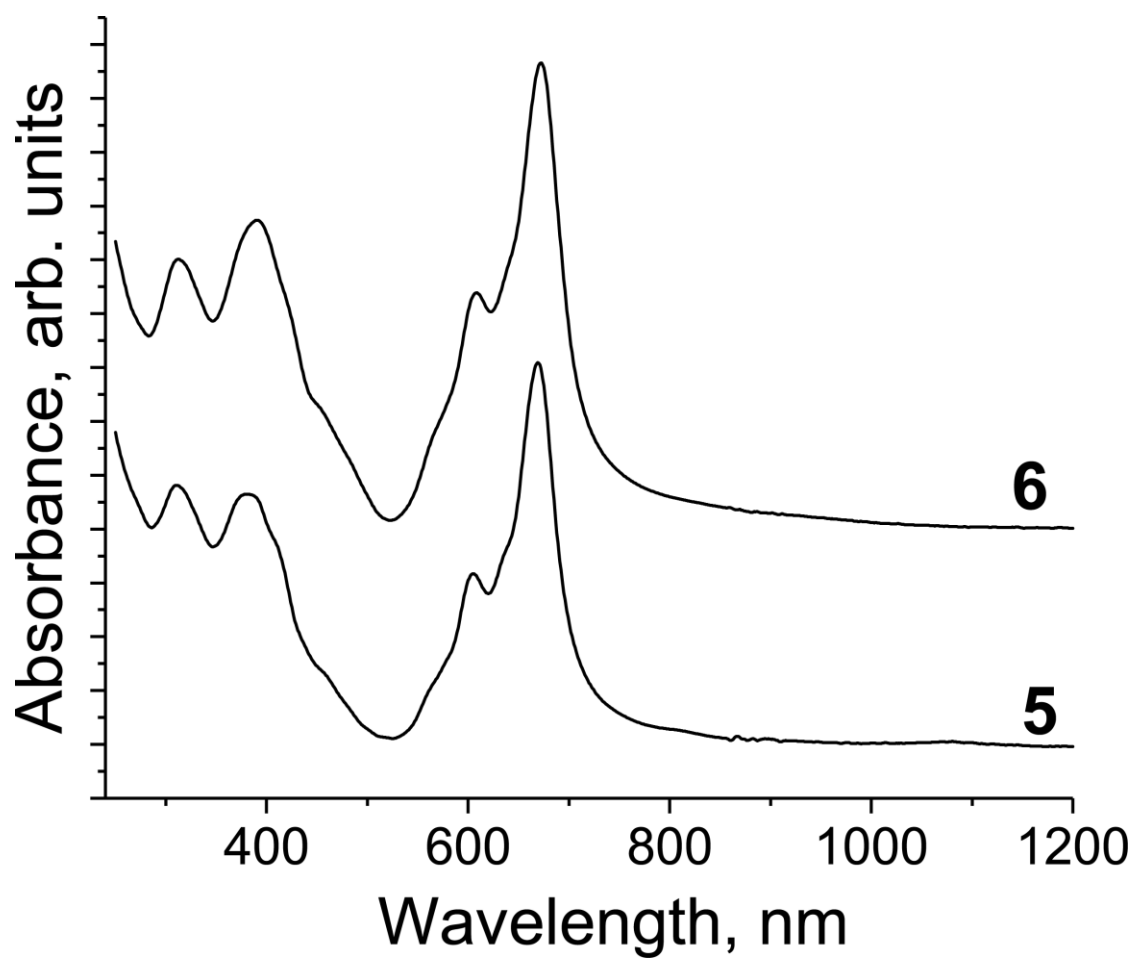

**Figure S12.** UV-visible-NIR spectra of compound **5** containing  $\{\text{Fe}^{\text{II}}(\text{CN})_2\text{Pc}\}^{2-}$  dianions and compound **6** with the  $\{\text{Fe}^{\text{II}}(\text{CN})_2\text{Pc}\cdot(\text{Cp}_3\text{Nd}^{\text{III}})_2\}^{2-}$  dianions.

### Crystal structures of the obtained complexes.

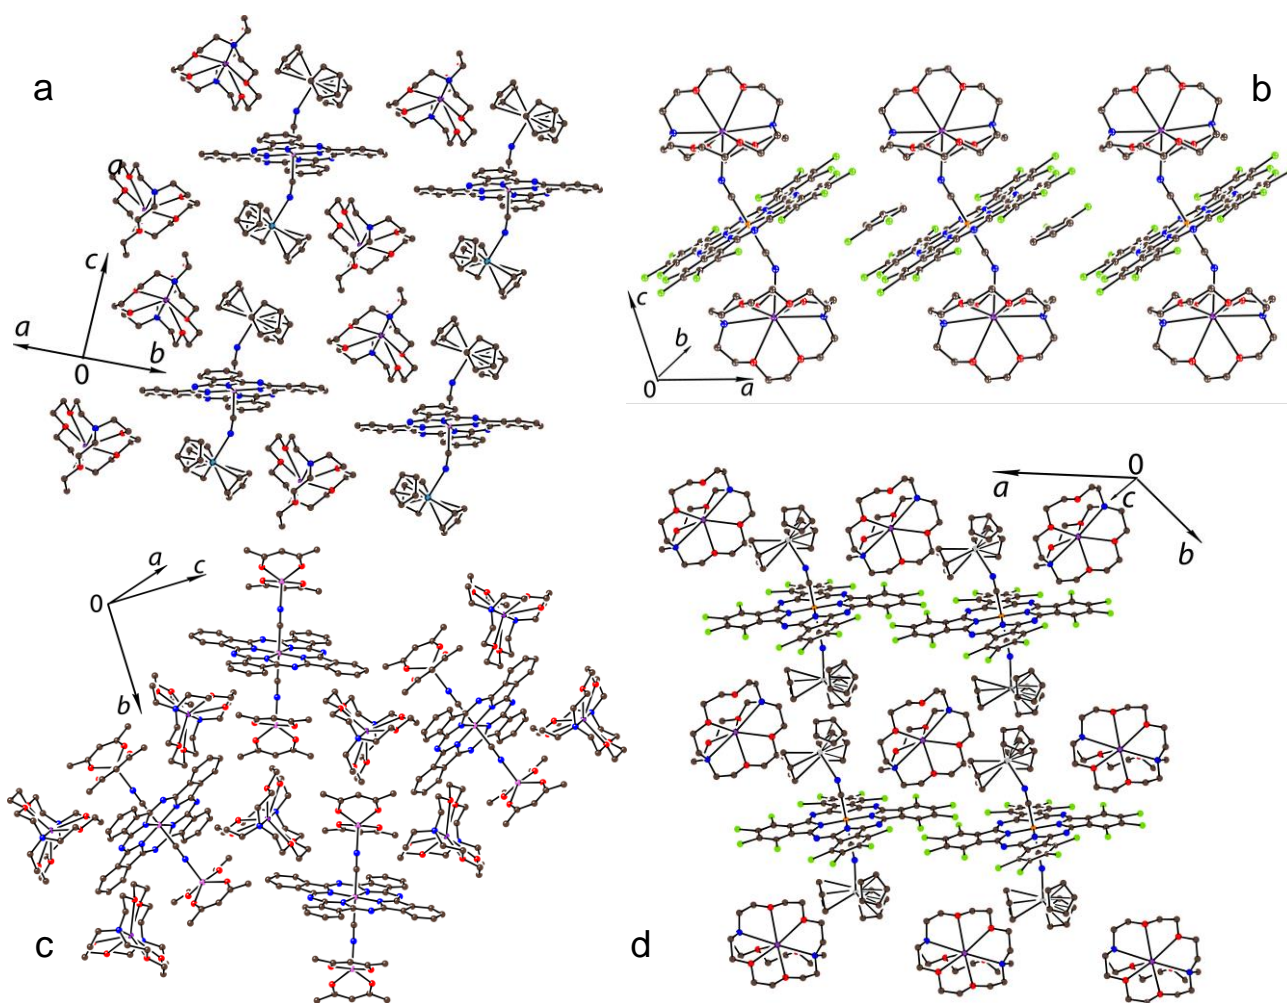

**Figure S13.** Crystal structures of: (a)  $\{\text{Cryptand}(\text{K}^+)\}_2\{\text{Mn}^{\text{II}}(\text{CN})_2\text{Pc}\cdot(\text{Cp}_3\text{Gd}^{\text{III}})_2\}^{2-}\cdot 5\text{C}_6\text{H}_4\text{Cl}_2$  (**3**); (b)  $\{\text{Cryptand}(\text{K}^+)\}_2\{\text{Fe}^{\text{II}}(\text{CN})_2\text{PcCl}_{16}\}^{2-}\cdot 2\text{C}_6\text{H}_4\text{Cl}_2$  (**7**); (c)  $\{\text{Cryptand}(\text{K}^+)\}_2\{\text{Mn}^{\text{II}}(\text{CN})_2\text{Pc}\cdot(\text{Mn}^{\text{II}}(\text{acac})_2)_2\}^{2-}\cdot 5\text{C}_6\text{H}_4\text{Cl}_2$  (**2**); and (d)  $\{\text{Cryptand}(\text{K}^+)\}_2\{\text{Fe}^{\text{II}}(\text{CN})_2(\text{PcCl}_{16})\cdot(\text{Cp}_3\text{Nd}^{\text{III}})_2\}^{2-}\cdot \text{C}_6\text{H}_4\text{Cl}_2$  (**8**). Solvent  $\text{C}_6\text{H}_4\text{Cl}_2$  molecules are not shown for clarity excluding compound **7**.

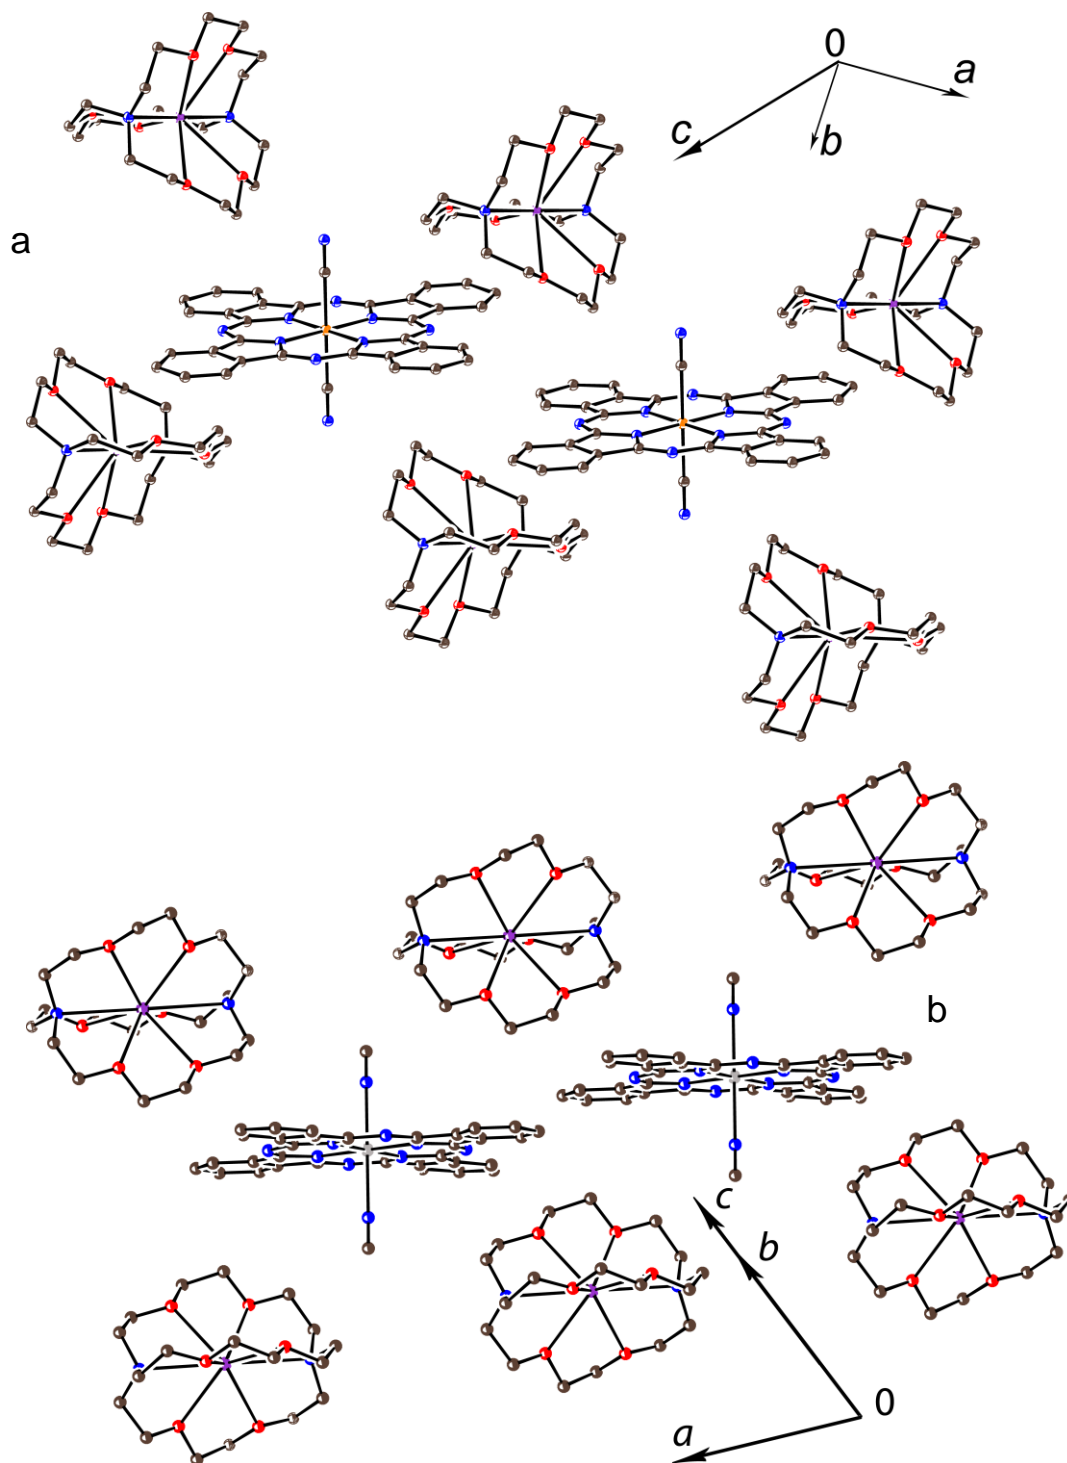

**Figure S14.** Crystal structures of isostructural salts  $\{\text{Cryptand}(\text{K}^+)\}_2 \{\text{Fe}^{\text{II}}(\text{CN})_2(\text{Pc}^{2-})\}^{2-} \cdot 0.72\text{C}_6\text{H}_4\text{Cl}_2$  (5) (a) and previously published salt  $\{\text{Cryptand}(\text{K}^+)\}_2 \{\text{Sn}^{\text{IV}}(\text{NC})_2(\text{Pc}^{4-})\}^{2-} \cdot \text{C}_6\text{H}_4\text{Cl}_2$  <sup>1</sup>. Compound  $\{\text{Cryptand}(\text{K}^+)\}_2 \{\text{Mn}^{\text{II}}(\text{CN})_2(\text{Pc}^{2-})\}^{2-} \cdot \text{C}_6\text{H}_4\text{Cl}_2$  (1) studied in this work is isostructural to these salts.

**Table S6.** Data of magnetic measurements for **1-7**.

| Compound, units and their spin state                                                                                                                                                                | SQUID data                                                                                                                       | EPR data, g-factor (linewidth, mT)                                                                                                                                                                                                                                                                                                 |
|-----------------------------------------------------------------------------------------------------------------------------------------------------------------------------------------------------|----------------------------------------------------------------------------------------------------------------------------------|------------------------------------------------------------------------------------------------------------------------------------------------------------------------------------------------------------------------------------------------------------------------------------------------------------------------------------|
| <b>1</b> , {Mn <sup>II</sup> (CN) <sub>2</sub> Pc} <sup>2-</sup> ( <i>S</i> = 1/2)                                                                                                                  | $\chi_M T = 0.41$ emu·K/mol at 300 K, $\Theta = -5$ K (10-300 K)                                                                 | 293 K, $g_1 = 2.1116$ (8.12), $g_2 = 2.0746$ (10.67), $g_3 = 1.9895$ (24.33)<br>4.2 K, $g_1 = 2.1029$ (17.29), $g_2 = 2.0712$ (9.65), $g_3 = 1.9907$ (21.30)                                                                                                                                                                       |
| <b>2</b> , {Mn <sup>II</sup> (CN) <sub>2</sub> Pc·(Mn <sup>II</sup> (acac) <sub>2</sub> ) <sub>2</sub> } <sup>2-</sup><br><i>S</i> = 5/2, <i>S</i> = 1/2, <i>S</i> = 5/2<br>( <i>S</i> = 9/2 at 2K) | $\chi_M T = 8.74$ emu·K/mol at 300 K, $\Theta = -12$ K (50-300 K)<br>$\chi_M T = 11.60$ emu·K/mol at 2 K                         | ZFS, $D = 0.0647$ , $E = 0.0192$ cm <sup>-1</sup> , $E/D = 0.298$ For <i>S</i> = 5/2 case. Central signal splits into three lines:<br>$g_1 = 2.0705$ (39.2), $g_2 = 1.7892$ (33.2), $g_3 = 1.5410$ (94.7) at 20 K                                                                                                                  |
| <b>3</b> , {Mn <sup>II</sup> (CN) <sub>2</sub> Pc·(Cp <sub>3</sub> Gd <sup>III</sup> ) <sub>2</sub> } <sup>2-</sup><br><i>S</i> = 7/2, <i>S</i> = 1/2, <i>S</i> = 7/2                               | $\chi_M T = 15.01$ emu·K/mol at 300 K                                                                                            | 293 K, $g_1 = 1.8699$ (107, 97.5%), $g_2 = 1.7119$ (29.4), $g_3 = 1.8562$ (11.02)<br>4.2 K, $g_1 = 1.8342$ (242, 97.5%), $g_2 = 1.7994$ (20.54), $g_3 = 1.8529$ (8.90), $g_4 = 1.9359$ (2.79)                                                                                                                                      |
| <b>4</b> , {Mn <sup>II</sup> (CN) <sub>2</sub> Pc·(Cp <sub>3</sub> Nd <sup>III</sup> ) <sub>2</sub> } <sup>2-</sup><br><i>S</i> = 3/2, <i>S</i> = 1/2, <i>S</i> = 3/2                               | $\chi_M T = 2.30$ emu·K/mol at 300 K                                                                                             | 293 K, $g_1 = 2.0275$ (28.80), $g_2 = 2.0836$ (10.51), $g_3 = 2.1167$ (7.52), $g_4 = 2.0039$ (0.32), $g_5 = 2.0022$ (0.72),<br>4.2 K, $g_1 = 1.9740$ (24.60), $g_2 = 2.0519$ (11.63), $g_3 = 2.0936$ (8.97), $g_4 = 2.0012$ (0.49), $g_5 = 1.9983$ (0.84)<br>Signals with $g_1$ and $g_2$ have only about 0.1% of total intensity. |
| <b>5</b> , {Fe <sup>II</sup> (CN) <sub>2</sub> Pc} <sup>2-</sup> ( <i>S</i> = 0)                                                                                                                    | -                                                                                                                                | EPR silent                                                                                                                                                                                                                                                                                                                         |
| <b>6</b> , {Fe <sup>II</sup> (CN) <sub>2</sub> Pc·(Cp <sub>3</sub> Nd <sup>III</sup> ) <sub>2</sub> } <sup>2-</sup><br><i>S</i> = 3/2, <i>S</i> = 0, <i>S</i> = 3/2                                 | $\chi_M T = 1.92$ emu·K/mol at 300 K                                                                                             | -                                                                                                                                                                                                                                                                                                                                  |
| <b>7</b> , {Fe <sup>II</sup> (CN) <sub>2</sub> (PcCl <sub>16</sub> ) <sub>2</sub> } <sup>2-</sup> ( <i>S</i> = 0)                                                                                   | Diamagnetic, $\chi_0 = -0.001376$ emu/mol<br>Curie impurities 1.2%<br>Calc. $\chi_0$ by using Pascal constants -0.001734 emu/mol | EPR silent                                                                                                                                                                                                                                                                                                                         |

$$\hat{H}_1 = -2J_1 (\vec{S}_1 \cdot \vec{S}_2 + \vec{S}_1 \cdot \vec{S}_3) - 2J_2 (\vec{S}_2 \cdot \vec{S}_3)$$

where  $\vec{S}_1$  is Mn<sup>II</sup> (*S* = 1/2) spin,  $\vec{S}_2$  and  $\vec{S}_3$  are Mn<sup>II</sup> (*S* = 5/2) spins,  $J_1$  is Mn<sup>II</sup>(*S* = 1/2) - Mn<sup>II</sup>(*S* = 5/2) exchange interaction,  $J_2$  is Mn<sup>II</sup>(*S* = 5/2) - Mn<sup>II</sup>(*S* = 5/2) exchange interaction inside a trinuclear Mn<sub>3</sub> assembly.

$$\hat{H}_2 = -2J_1 (\vec{S}_1 \cdot \vec{S}_2 + \vec{S}_1 \cdot \vec{S}_3),$$

where  $\vec{S}_1$  is Mn<sup>II</sup> (*S* = 1/2) spin,  $\vec{S}_2$  and  $\vec{S}_3$  are Gd<sup>III</sup> (*S* = 7/2) spins,  $J_1$  is Mn<sup>II</sup>(*S* = 1/2) - Gd<sup>III</sup>(*S* = 7/2) exchange interaction

Magnetic data for compound 1.

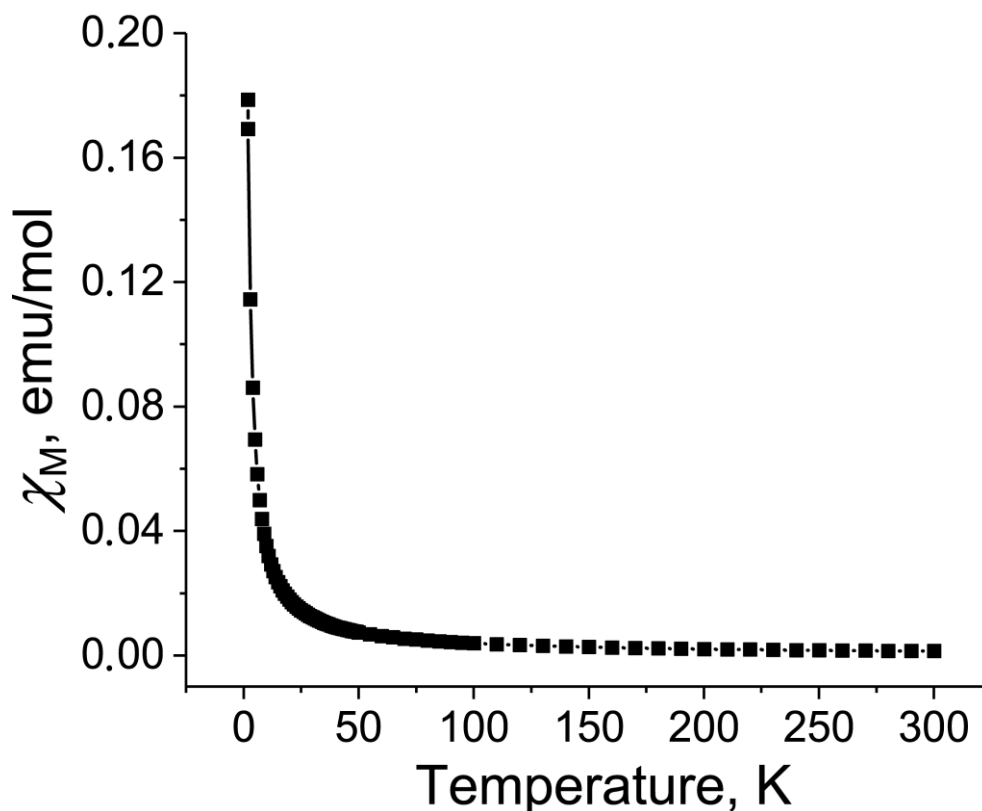

**Figure S15.** Temperature dependence of molar magnetic susceptibility of  $\{\text{Cryptand}(\text{K}^+)\}_2\{\text{Mn}^{\text{II}}(\text{CN})_2\text{Pc}\}^{2-}\cdot\text{C}_6\text{H}_4\text{Cl}_2$  (**1**).

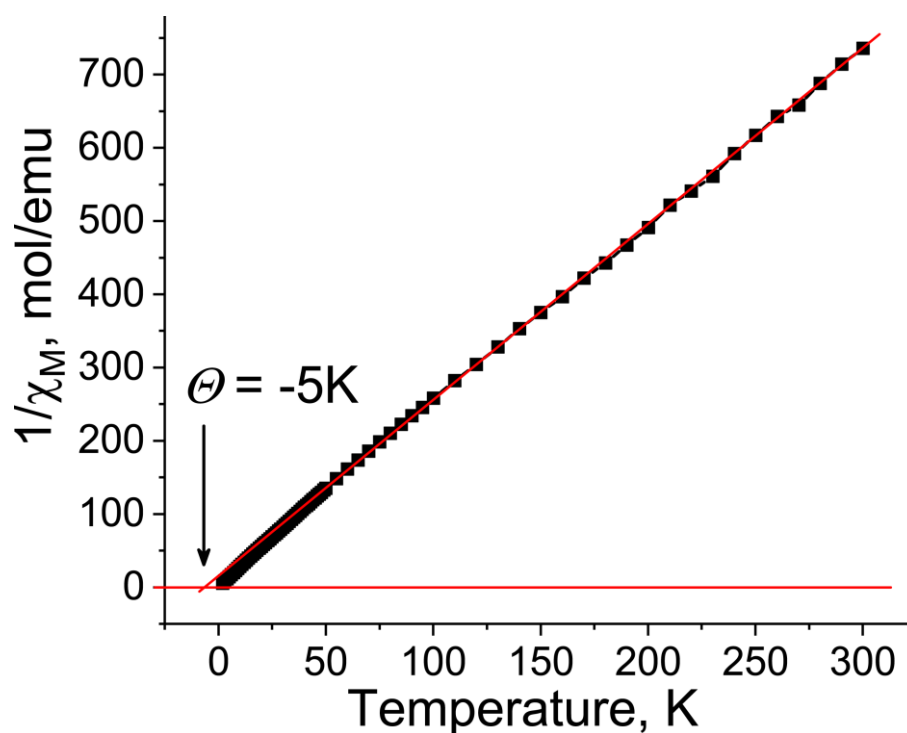

**Figure S16.** Temperature dependence of reciprocal molar magnetic susceptibility of  $\{\text{Cryptand}(\text{K}^+)\}_2\{\text{Mn}^{\text{II}}(\text{CN})_2\text{Pc}\}^{2-}\cdot\text{C}_6\text{H}_4\text{Cl}_2$  (**1**) which allows to determine Weiss temperature.

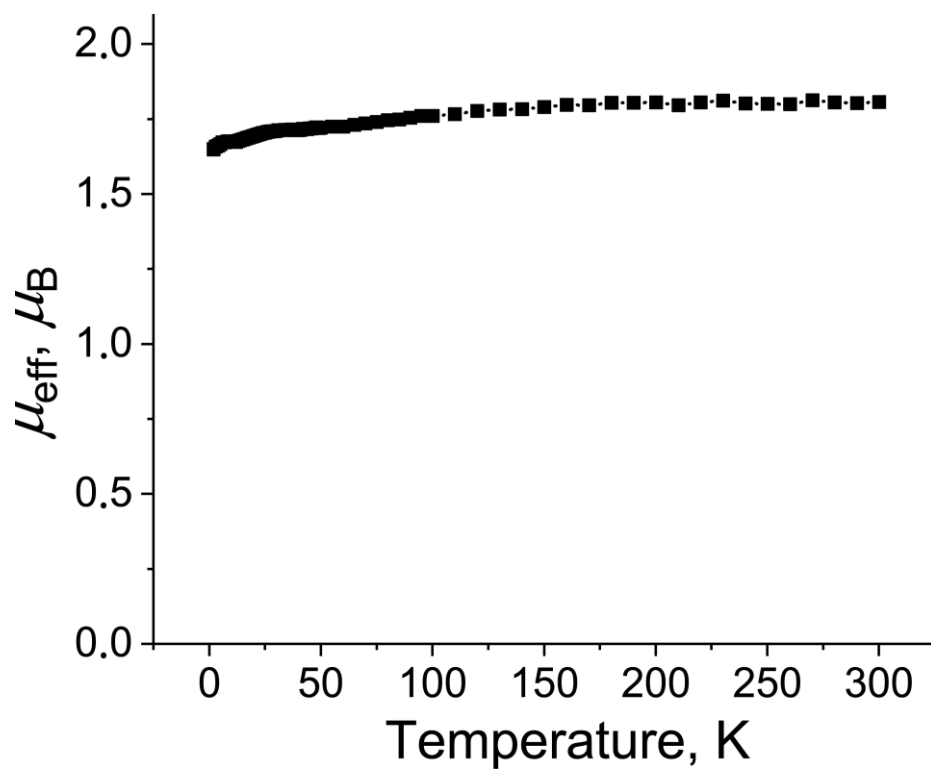

**Figure S17.** Temperature dependence for effective magnetic moment of  $\{\text{Cryptand}(\text{K}^+)\}_2\{\text{Mn}^{\text{II}}(\text{CN})_2\text{Pc}\}^{2-}\cdot\text{C}_6\text{H}_4\text{Cl}_2$  (**1**).



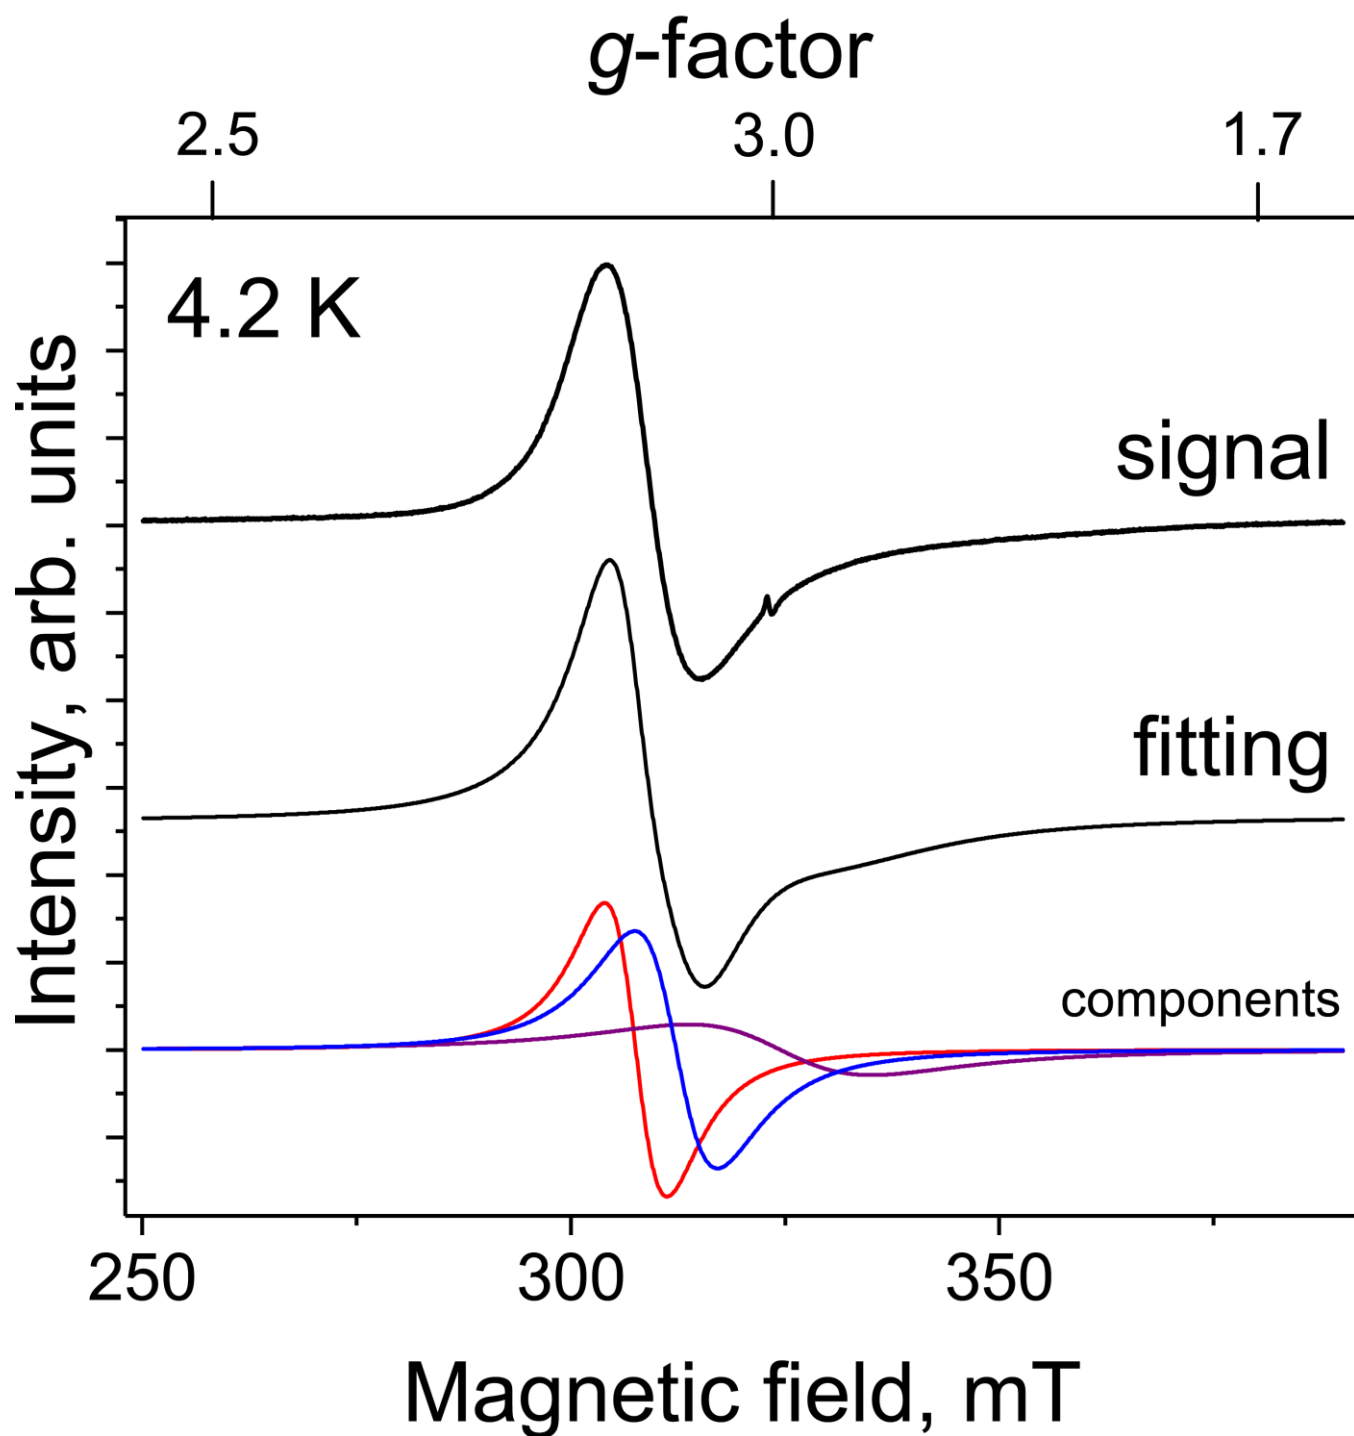

**Figure S18.** EPR spectrum of polycrystalline  $\{\text{Cryptand}(\text{K}^+)\}_2\{\text{Mn}^{\text{II}}(\text{CN})_2\text{Pc}\}^{2-}\cdot\text{C}_6\text{H}_4\text{Cl}_2$  (**1**) at 4.2 K. Fitting of the signal by three Lorentzian lines is shown below.

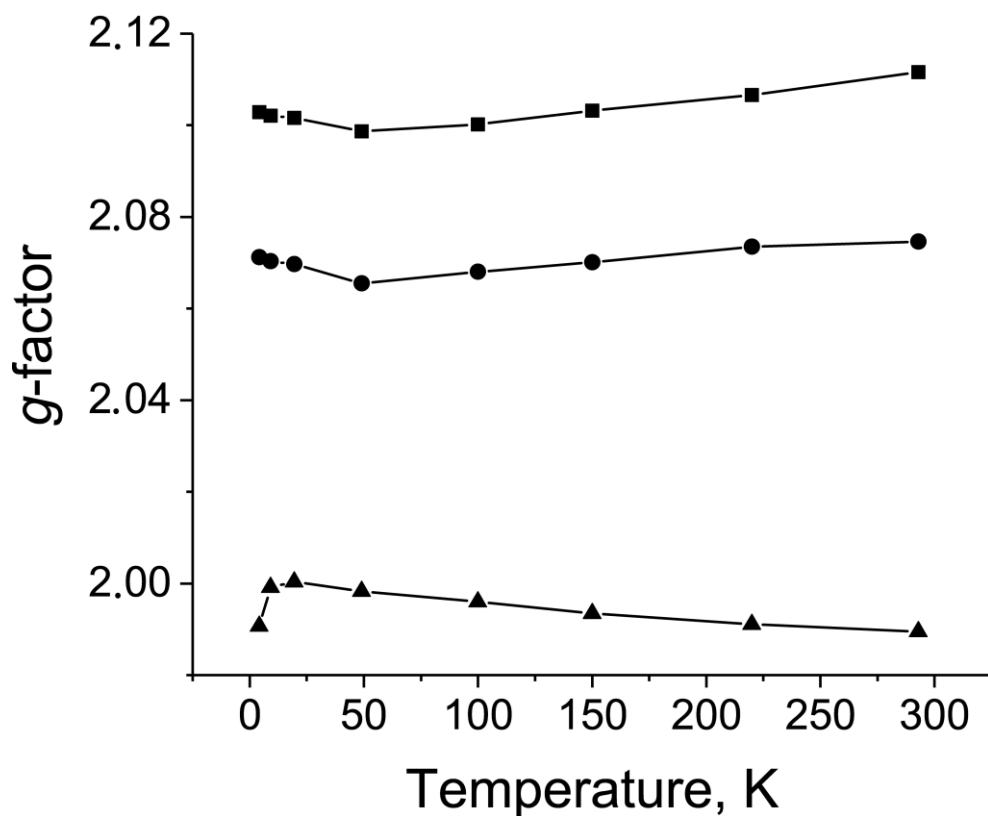

**Figure S19.** Temperature dependence of  $g$ -factors of three Lorentzian components of EPR signal from  $\{\text{Cryptand}(\text{K}^+)\}_2\{\text{Mn}^{\text{II}}(\text{CN})_2\text{Pc}\}^{2-}\cdot\text{C}_6\text{H}_4\text{Cl}_2$  (**1**).

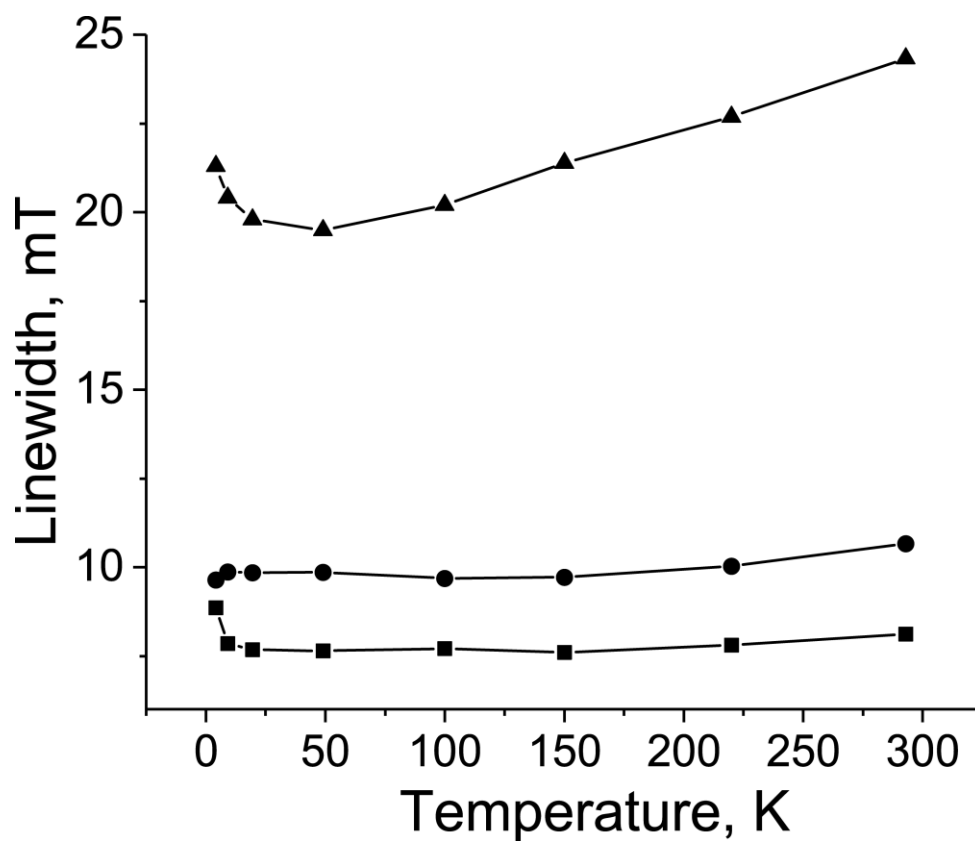

**Figure S20.** Temperature dependence of linewidth for three Lorentzian components of EPR signal from  $\{\text{Cryptand}(\text{K}^+)\}_2\{\text{Mn}^{\text{II}}(\text{CN})_2\text{Pc}\}^{2-}\cdot\text{C}_6\text{H}_4\text{Cl}_2$  (**1**).

### Magnetic data for compound 2

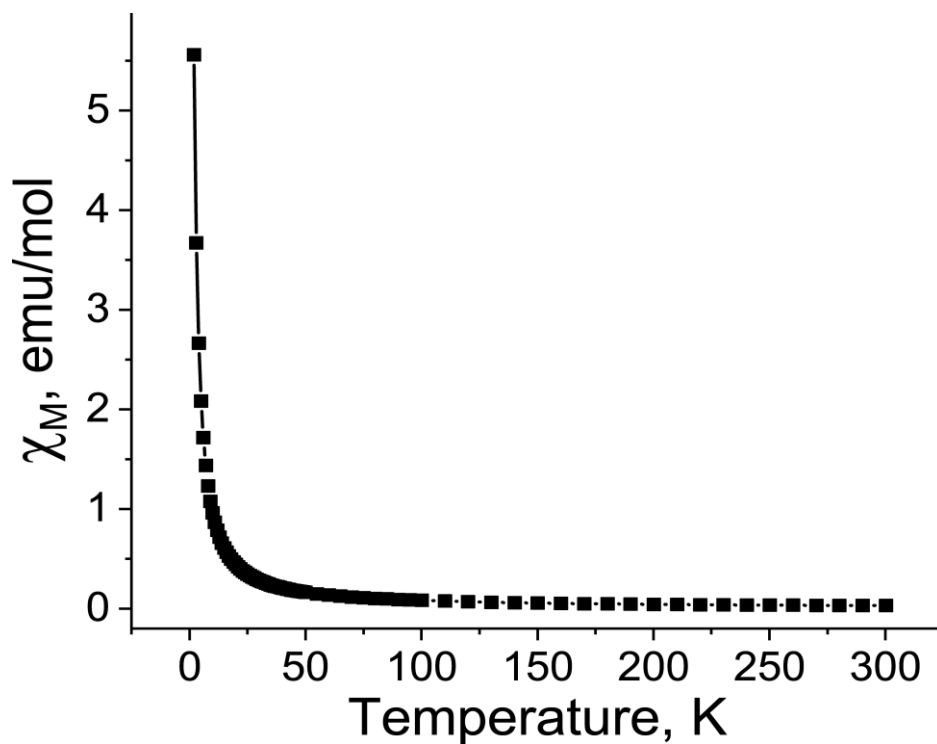

**Figure S21.** Temperature dependence of molar magnetic susceptibility of  $\{\text{Cryptand(K)}\}_2 \cdot \{\text{Mn}^{\text{II}}(\text{CN})_2\text{Pc} \cdot [\text{Mn}^{\text{II}}(\text{acac})_2]_2\} \cdot 5\text{C}_6\text{H}_4\text{Cl}_2$  (**2**).

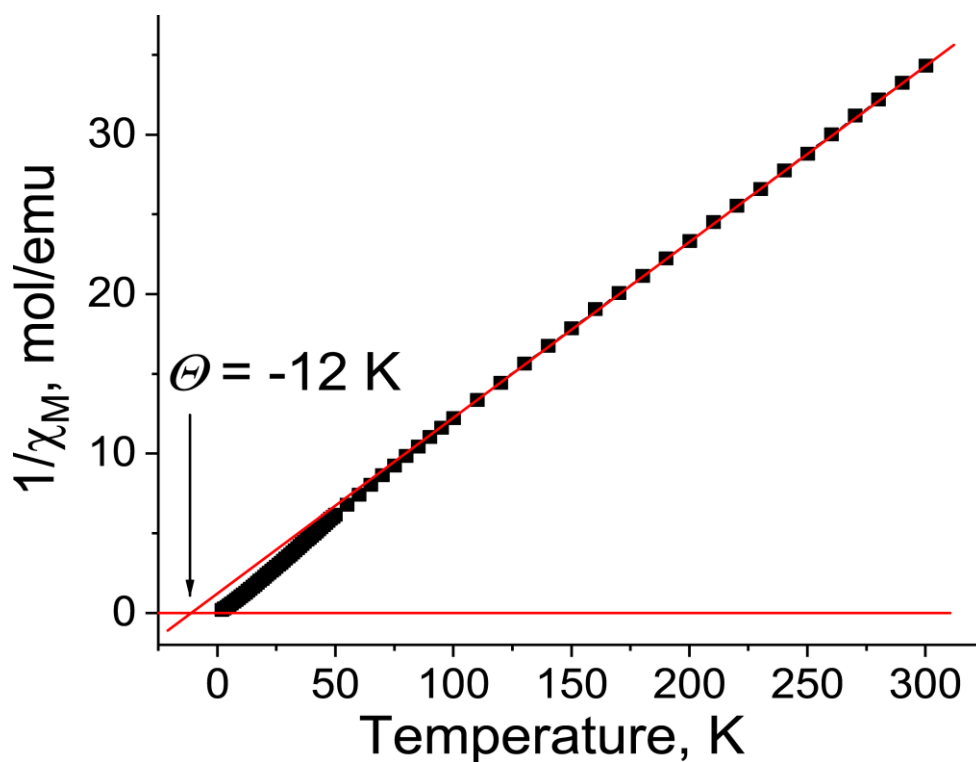

**Figure S22.** Temperature dependence of reciprocal molar magnetic susceptibility of  $\{\text{Cryptand(K)}\}_2 \cdot \{\text{Mn}^{\text{II}}(\text{CN})_2\text{Pc} \cdot [\text{Mn}^{\text{II}}(\text{acac})_2]_2\} \cdot 5\text{C}_6\text{H}_4\text{Cl}_2$  (**2**).

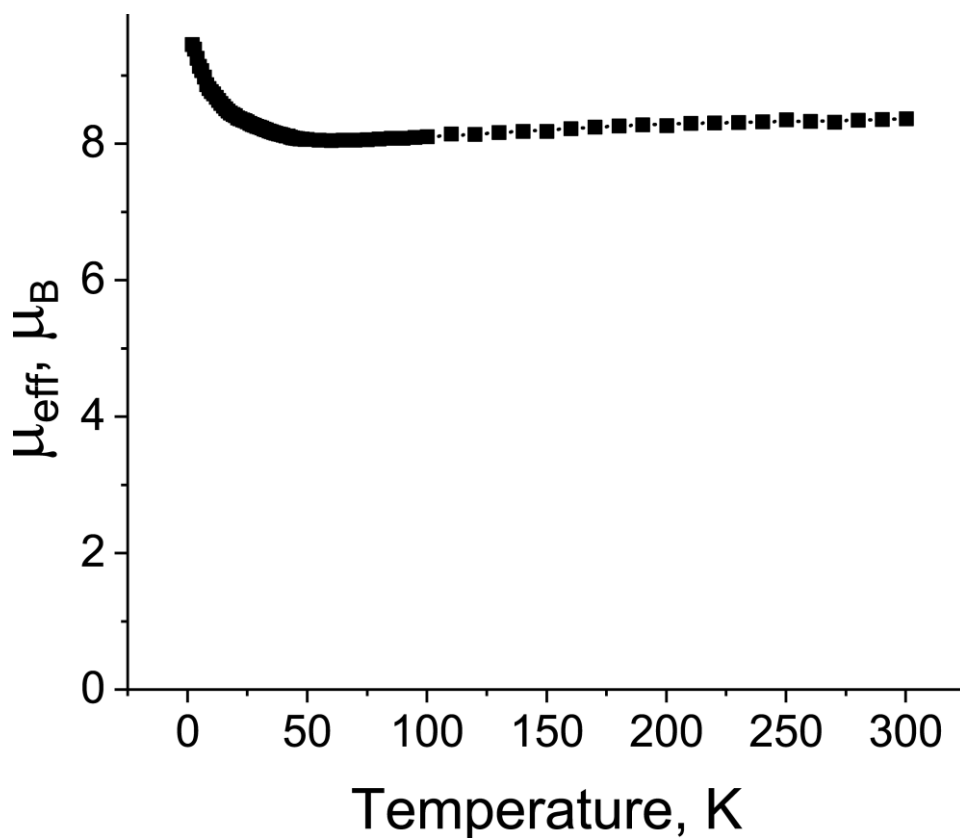

**Figure S23.** Temperature dependence of effective magnetic moment of  $\{\text{Cryptand}(\text{K})\}_2 \cdot \{\text{Mn}^{\text{II}}(\text{CN})_2\text{Pc} \cdot [\text{Mn}^{\text{II}}(\text{acac})_2]_2\} \cdot 5\text{C}_6\text{H}_4\text{Cl}_2$  (**2**) in the FC conditions.

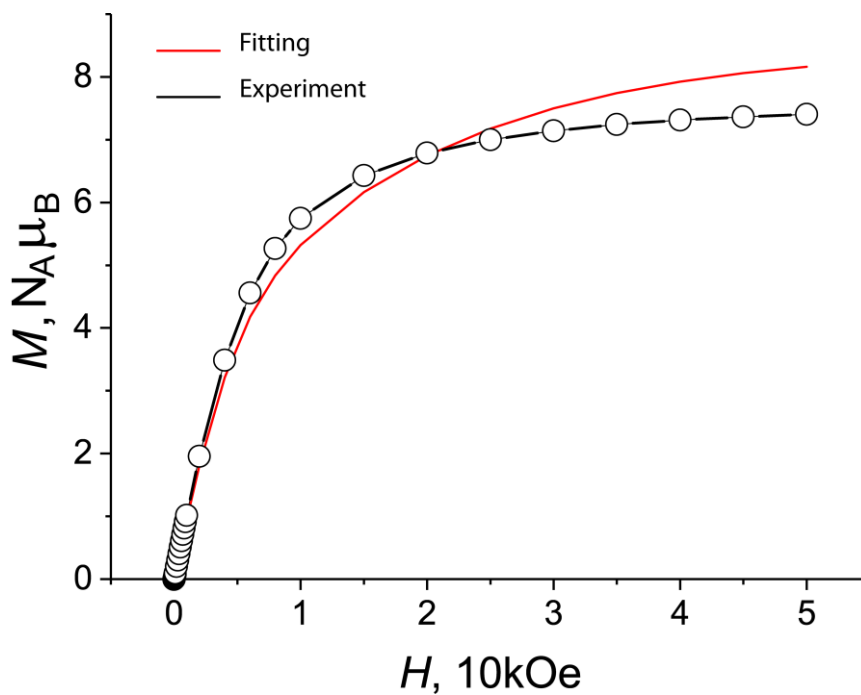

**Figure S23a.** Magnetization of **2** in  $N_A \mu_B$  vs magnetic field up to 5T (black line is a guide to the eye) and fitting of these data by using PHI program (red curve).

### Magnetic data for 3

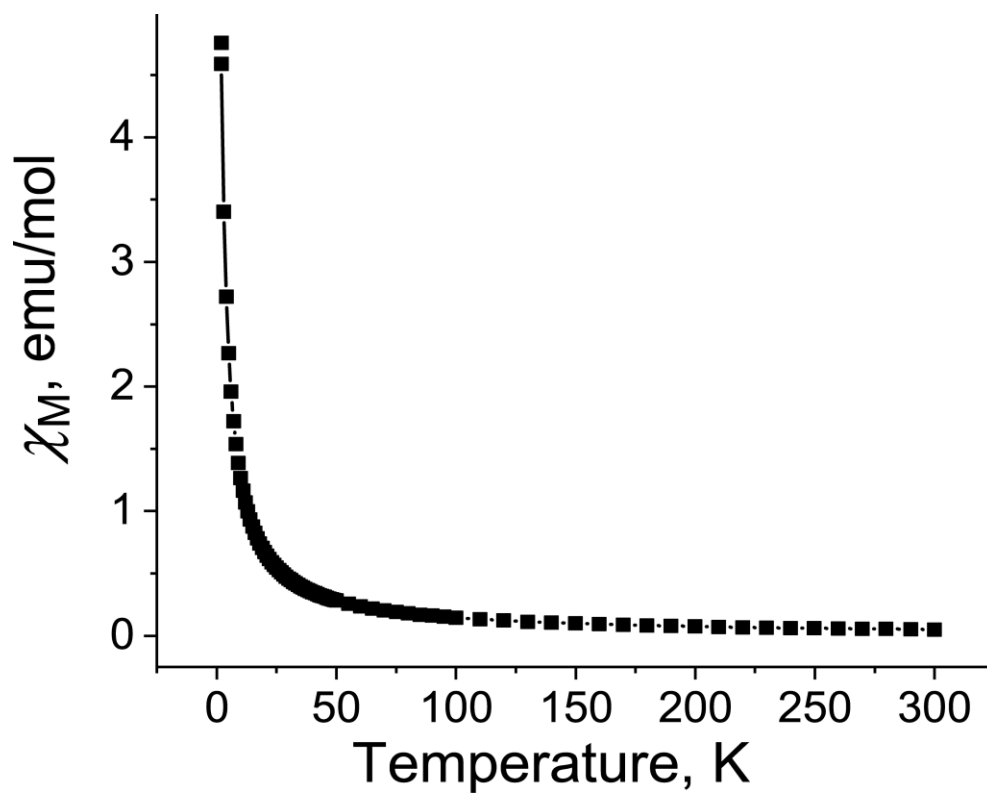

**Figure S24.** Temperature dependence of molar magnetic susceptibility of  $\{\text{Cryptand(K)}\}_2\{\text{Mn}^{\text{II}}(\text{CN})_2\text{Pc}\cdot(\text{Cp}_3\text{Gd}^{\text{III}})_2\}\cdot 4\text{C}_6\text{H}_4\text{Cl}_2$  (**3**).

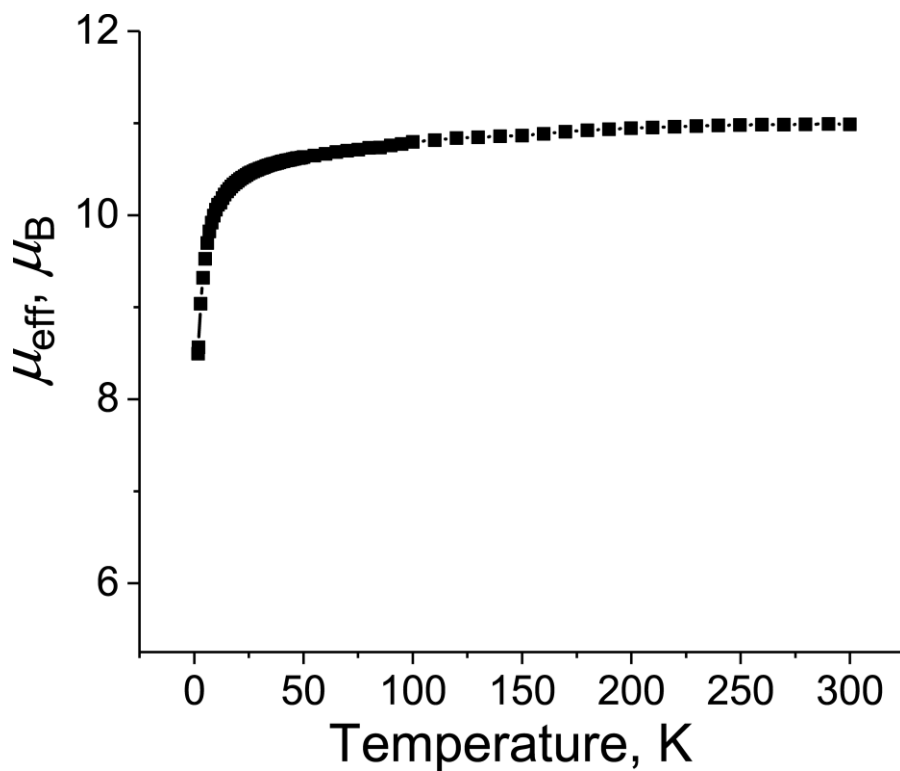

**Figure S25.** Temperature dependence of effective magnetic moment of  $\{\text{Cryptand}(\text{K})\}_2\{\text{Mn}^{\text{II}}(\text{CN})_2\text{Pc}\cdot(\text{Cp}_3\text{Gd}^{\text{III}})_2\}\cdot 4\text{C}_6\text{H}_4\text{Cl}_2$  (**3**).

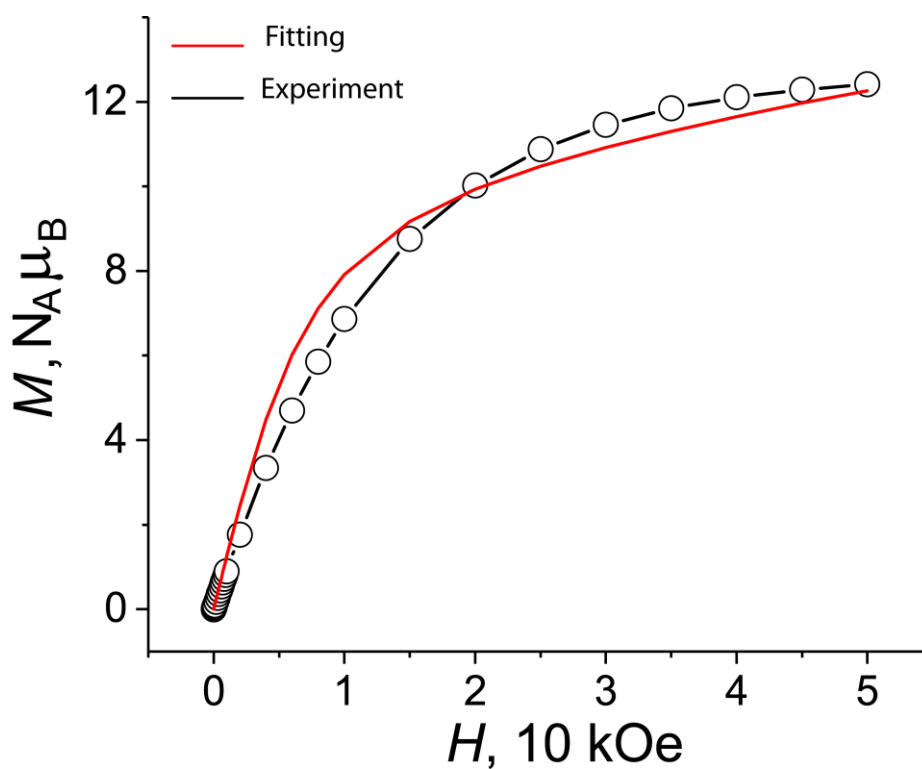

**Figure S25a.** Magnetization of **3** in  $N_A\mu_B$  vs magnetic field up to 5T (black line is a guide to the eye) and fitting of these data by using PHI program (red curve).

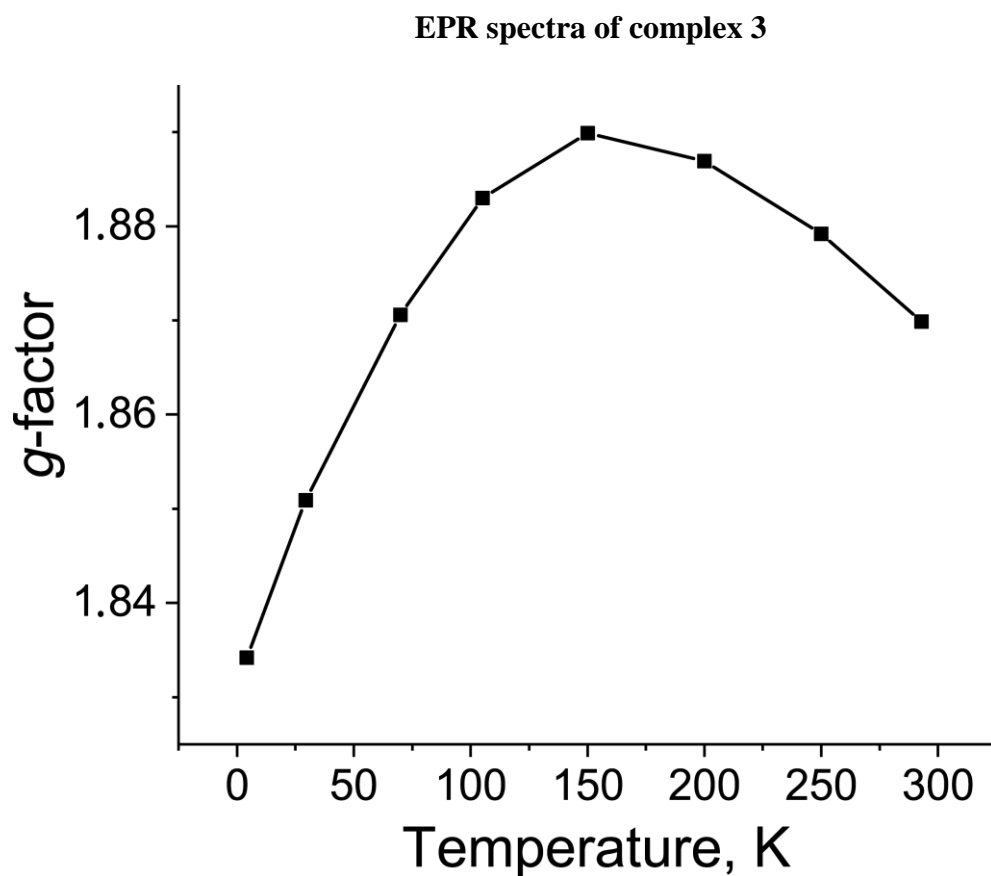

**Figure S26.** Temperature dependence of  $g$ -factor for broad EPR signal of **3**.

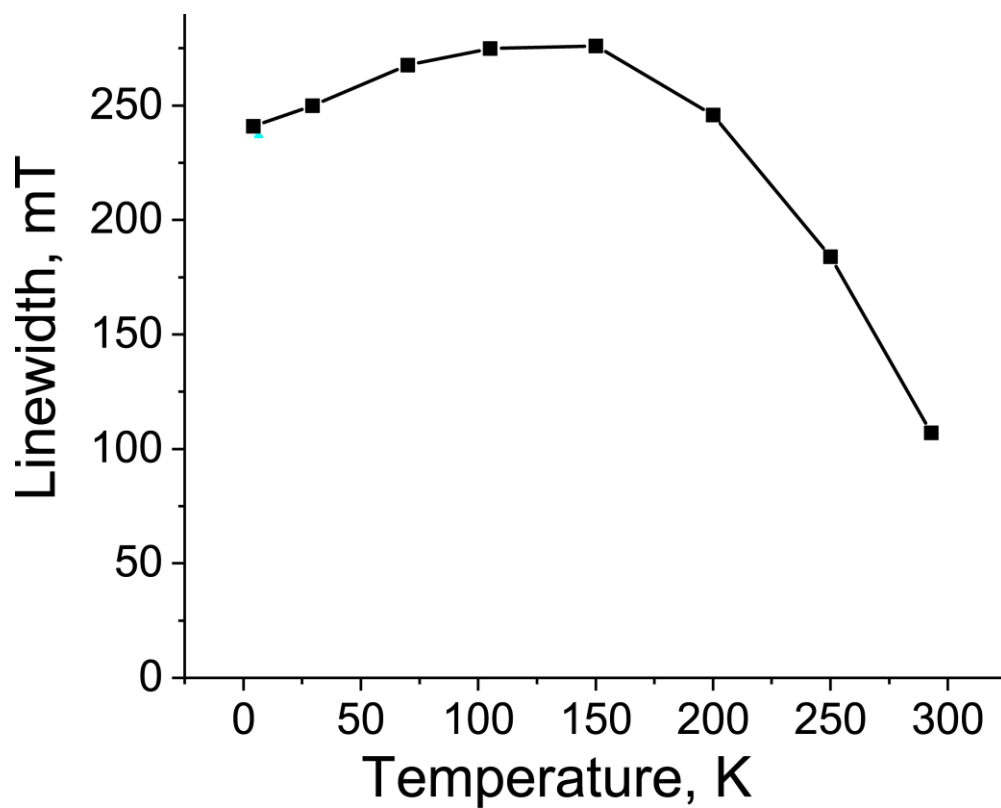

**Figure S27.** Temperature dependence of linewidth for broad EPR signal of **3**.

Magnetic data for complex 4.

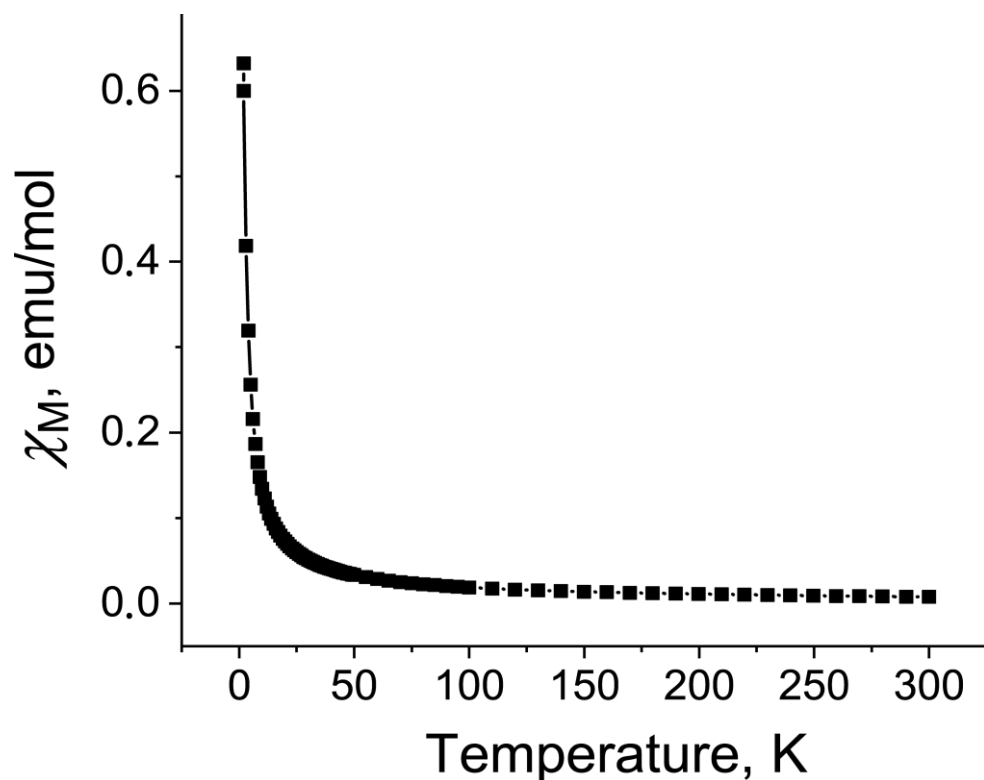

**Figure S28.** Temperature dependence of molar magnetic susceptibility of  $\{\text{Cryptand}(\text{K})\}_2\{\text{Mn}^{\text{II}}(\text{CN})_2\text{Pc}\cdot(\text{Cp}_3\text{Nd}^{\text{III}})_2\}\cdot 4\text{C}_6\text{H}_4\text{Cl}_2$  (**4**).

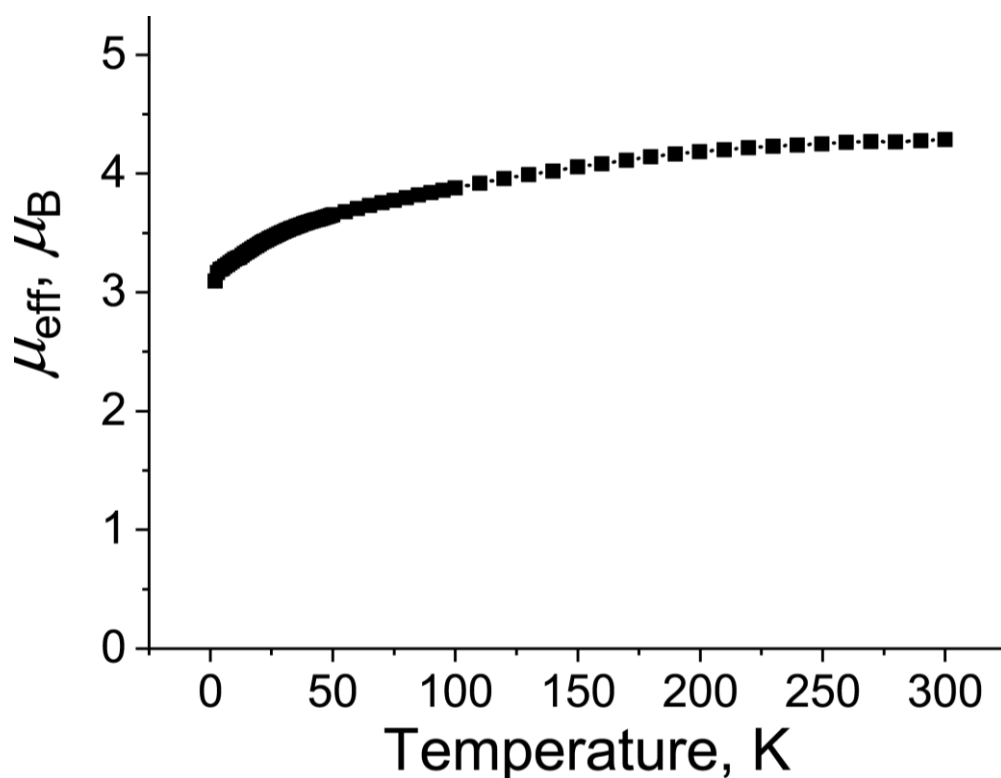

**Figure S29.** Temperature dependence of effective magnetic moment of  $\{\text{Cryptand}(\text{K})\}_2\{\text{Mn}^{\text{II}}(\text{CN})_2\text{Pc}\cdot(\text{Cp}_3\text{Nd}^{\text{III}})_2\}\cdot 4\text{C}_6\text{H}_4\text{Cl}_2$  (**4**).



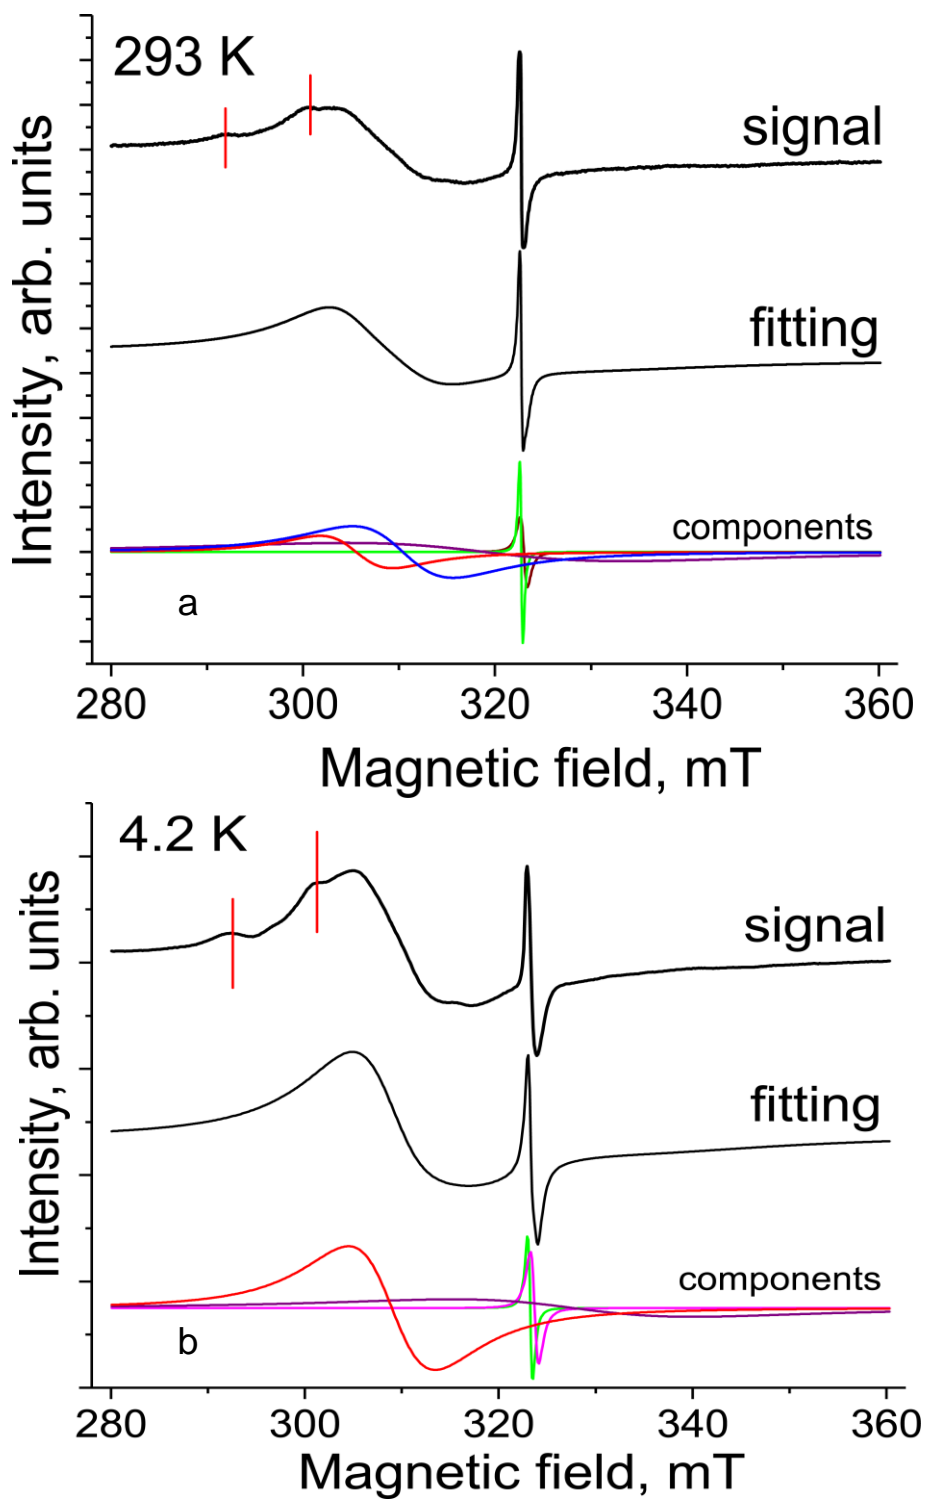

**Figure S30.** EPR spectra of polycrystalline **4** at 293 and 4.2 K. Fitting of the signal by five Lorentzian components is shown below. Red bars show additional features which can be attributed to non-resolved ZFS.

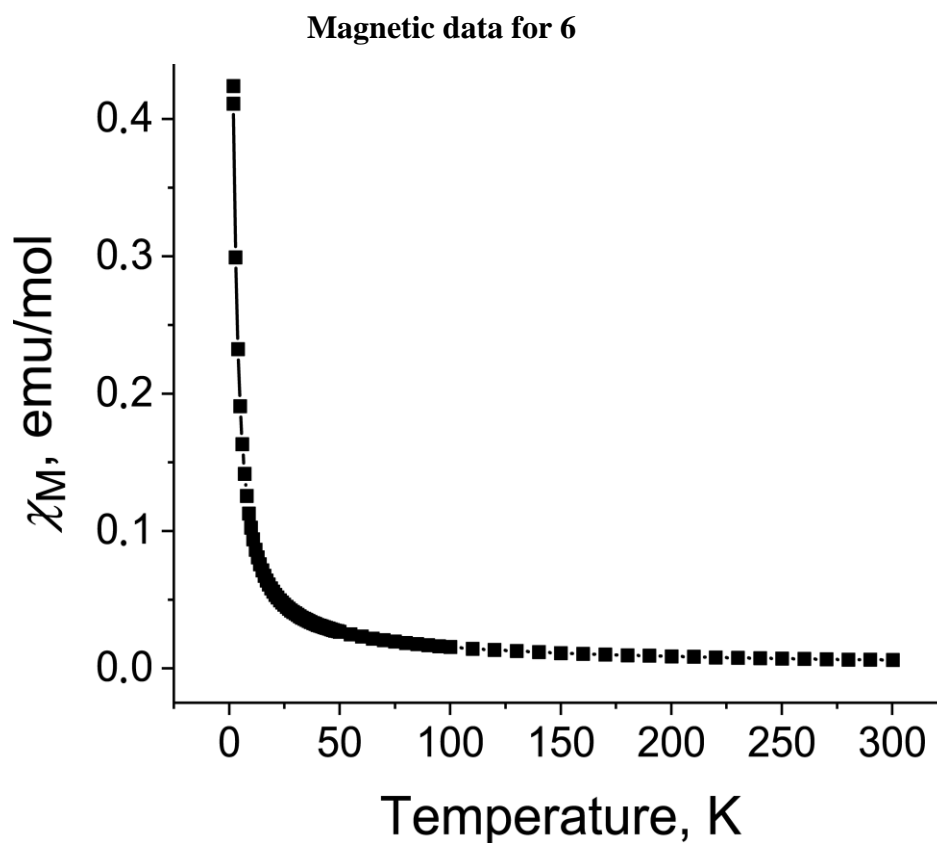

**Figure S31.** Temperature dependence of molar magnetic susceptibility of  $\{\text{Cryptand}(\text{K})\}_2\{\text{Fe}^{\text{II}}(\text{CN})_2\text{Pc}\cdot(\text{Cp}_3\text{Nd}^{\text{III}})_2\}\cdot 4\text{C}_6\text{H}_4\text{Cl}_2$  (**6**).

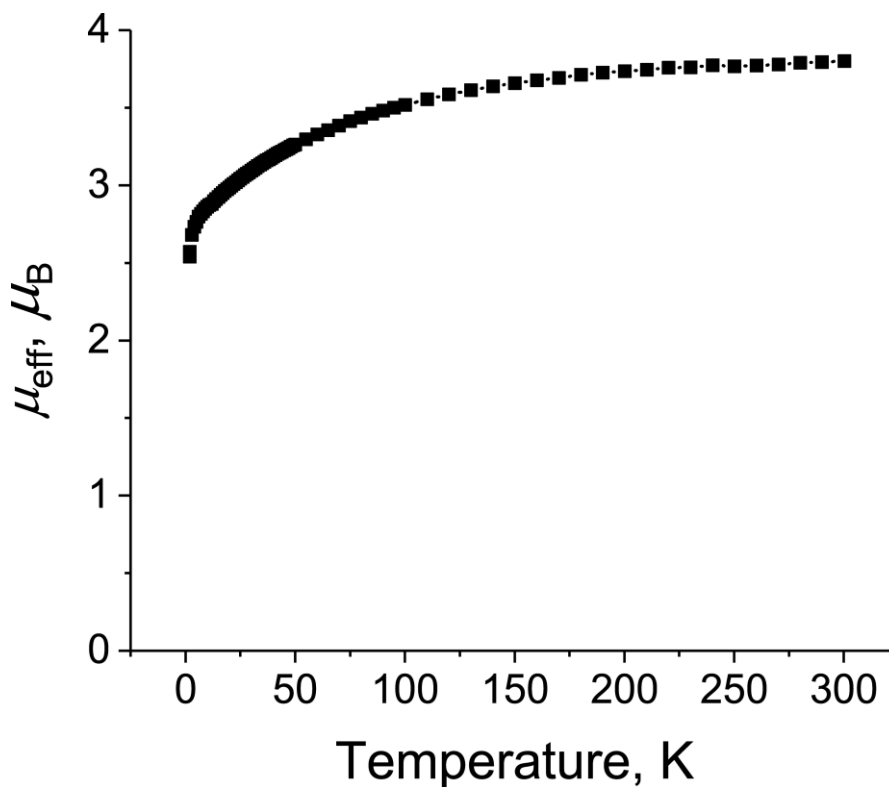

**Figure S32.** Temperature dependence of effective magnetic moment of  $\{\text{Cryptand}(\text{K})\}_2\{\text{Fe}^{\text{II}}(\text{CN})_2\text{Pc}\cdot(\text{Cp}_3\text{Nd}^{\text{III}})_2\}\cdot 4\text{C}_6\text{H}_4\text{Cl}_2$  (**6**).

Magnetic data for 7

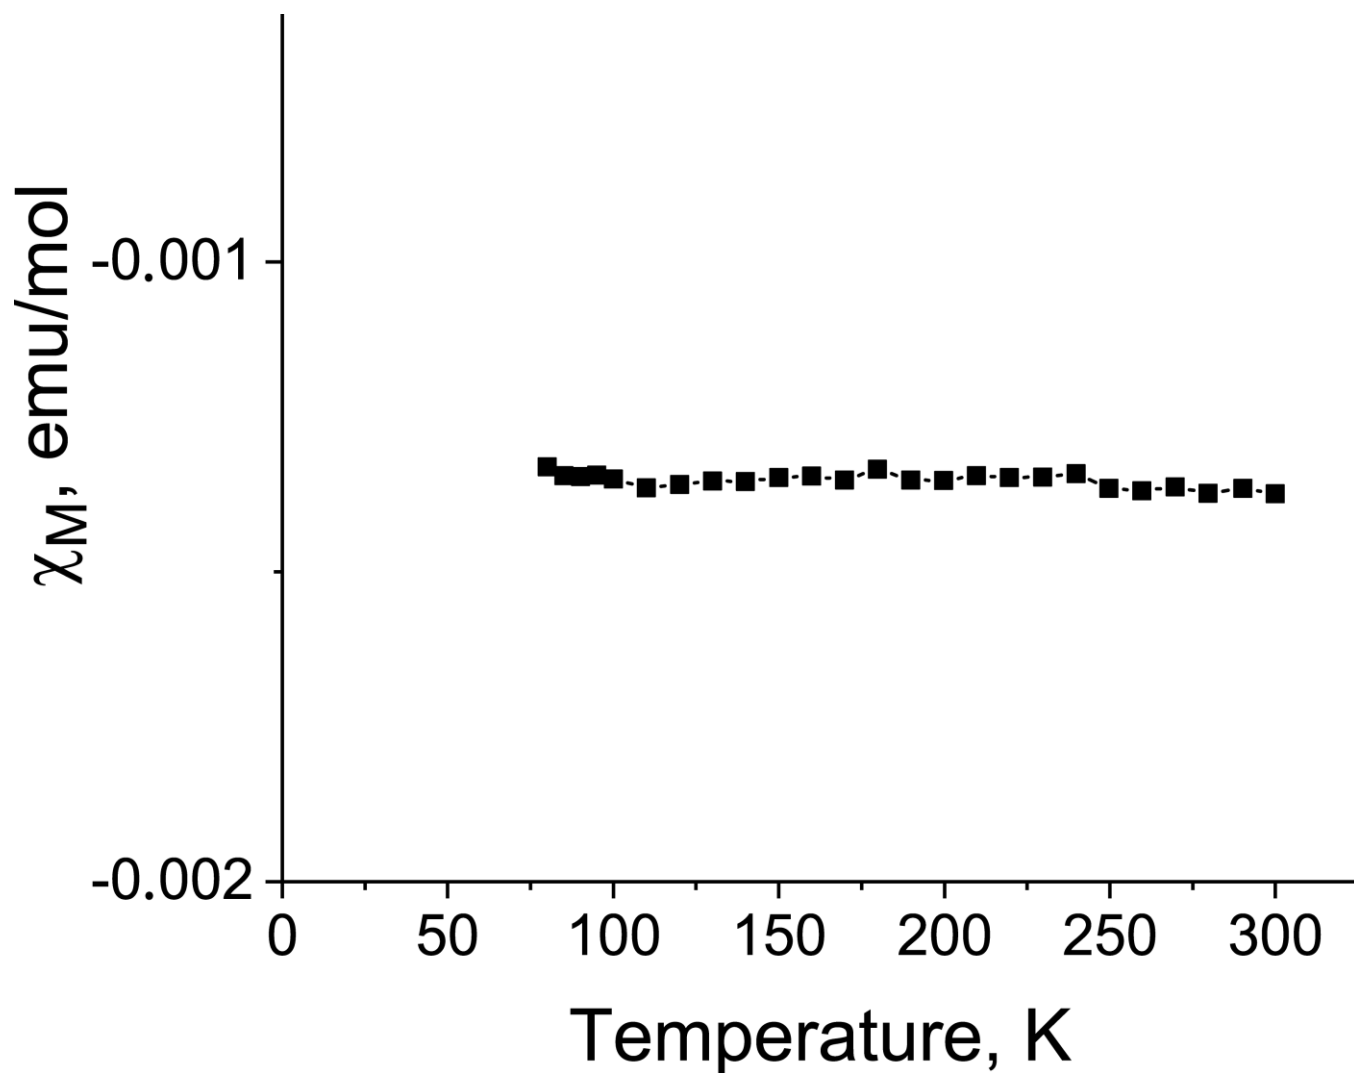

Figure S33. Temperature dependence of molar magnetic susceptibility of polycrystalline Cryptand(K)<sub>2</sub>{Fe<sup>II</sup>(CN)<sub>2</sub>(PcCl<sub>16</sub>)}·2C<sub>6</sub>H<sub>4</sub>Cl<sub>2</sub> (7) in 70-300 K range.

## Theoretical calculations

Optimization of the molecular structures was performed using the PBE exchange-correlation functional<sup>4</sup> and with the extended basis set Fe, Mn: [9s9p8d/5s5p4d], N,C: [5s5p2d/3s3p2d], H :[5s1p/3s1p] for the valence electrons and the SBK pseudopotential<sup>5</sup> implemented in the PRIRODA packag<sup>6</sup>. The Hirschfeld method<sup>7</sup> was used to calculate atomic charges. Electronic spectra are estimated using results of TDDFT calculations for energies and oscillator strengths of electronic transitions at fixed linewidth of 25 nm of Lorents peaks. All calculations were performed at Joint Supercomputer Center of the Russian Academy of Sciences.

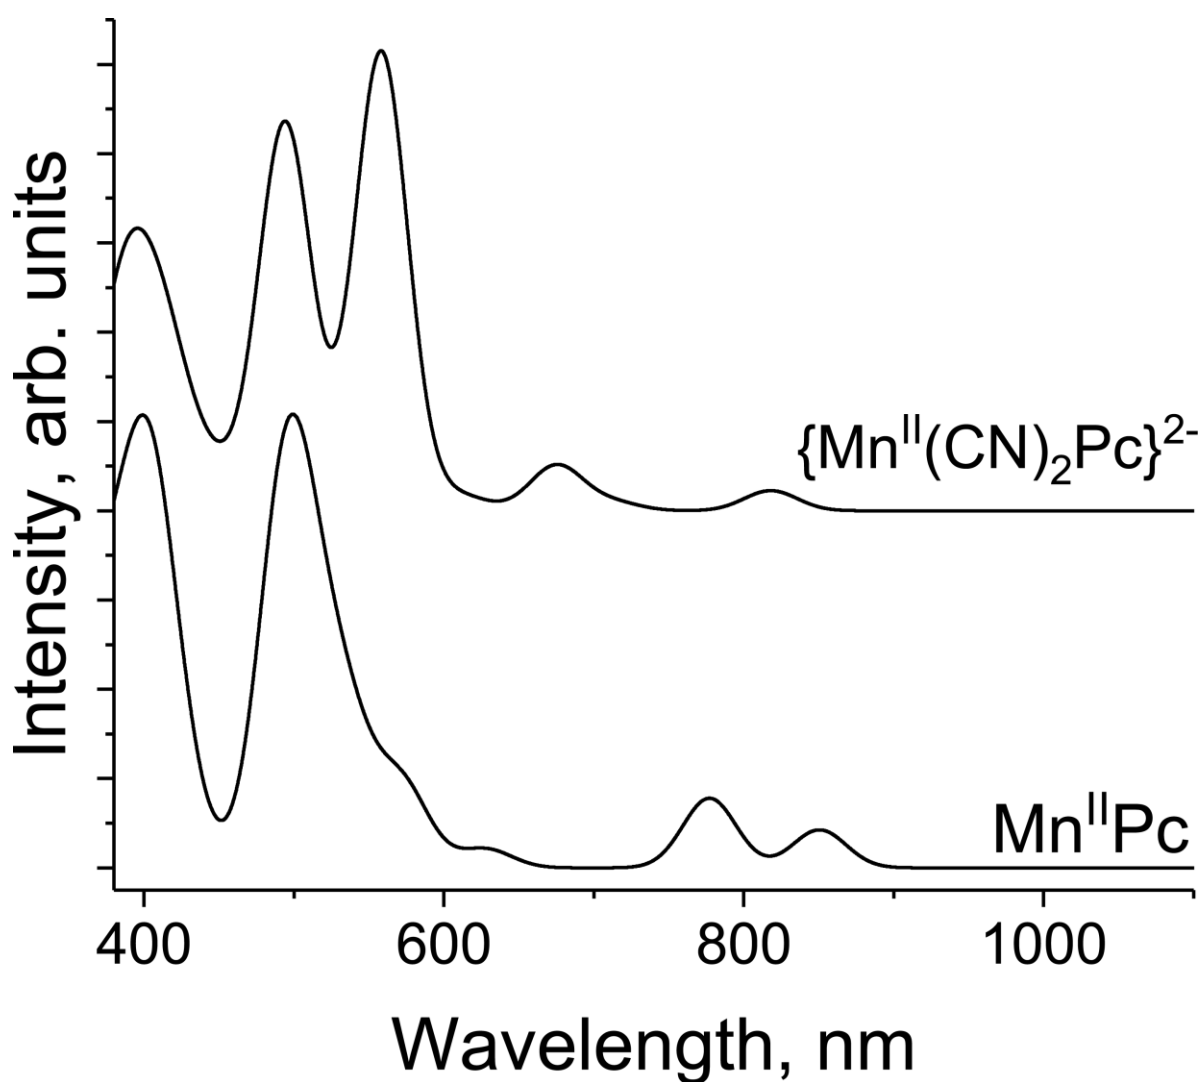

**Fig. S34.** Calculated spectra of pristine  $\text{Mn}^{\text{II}}\text{Pc}$ , its dicyano-complex  $\{\text{Mn}^{\text{II}}(\text{CN})_2\text{Pc}\}^{2-}$ .

### Optical spectra.

Calculated optical spectra of pristine  $\text{Mn}^{\text{II}}\text{Pc}$  and its dicyano complex  $\{\text{Mn}^{\text{II}}(\text{CN})_2\text{Pc}\}^{2-}$  are shown in Fig. S37. The Soret and the Q-bands are manifested at 400 and 500 nm (the Q-band is strongly blue shifted relative to the experimental spectrum by about 230 nm). Low-energy bands at 780 and 856 nm are not manifested in the spectrum most probably due to low intensity. Formation of dicyano complex  $\{\text{Mn}^{\text{II}}(\text{CN})_2\text{Pc}\}^{2-}$  splits the Q-band into two bands positioned at 490 and 554 nm and this splitting is similar to that in experimental spectrum of **1** when the Q-band at 736 nm is split into two bands at 684 and 805 nm. Low-energy bands at 675 and 818 nm decrease in intensity at cyanation and are not manifested in the experimental spectrum.

### Calculated molecular structures.

States with a total spin of 11/2 and 9/2, which differ in the orientation of a spin of the central Mn(II) atom ( $S = 1/2$ ), are generated for the  $\{\text{Mn}^{\text{II}}(\text{CN})_2\text{Pc}\cdot(\text{Mn}^{\text{II}}(\text{acac})_2)_2\}^{2-}$  dianions. According to the calculations high-spin state of the system is lower in energy by 16.2 meV in comparison with low-spin state. Optimization of a neutral adduct with two counter cations:  $\{\text{Cryptand}(\text{K}^+)\}_2\{\text{Mn}^{\text{II}}(\text{CN})_2\text{Pc}\cdot(\text{Mn}^{\text{II}}(\text{acac})_2)_2\}^{2-}$  shows their small effect on the geometry of trinuclear Mn complex (see Fig. S42). But there is a pronounced effect on the energy gap: a system with spin 11/2 has an energy less by 7.7 meV than that with spin 9/2. Since the accuracy of calculated total energies is 0.0001 a.u., or 2.7 meV. The energy gap predicted,  $7.7 \pm 5.4$  meV or  $89 \pm 63$  K, has a large error. To diminish this error it is necessary to use direct methods of calculation of small constants of magnetic coupling.

The  $D_{4h}$  symmetry of  $\{\text{Mn}^{\text{II}}(\text{CN})_2\text{Pc}\}^{2-}$  (Fig. S39) without  $C_2$  distortion, which is found for  $\text{Mn}^{\text{II}}\text{Pc}$  in quartet state (Fig. S38), shows that unpaired  $d$  electron of  $\{\text{Mn}^{\text{II}}(\text{CN})_2\text{Pc}\}^{2-}$  occupies  $xy$  orbital. The overlapping of this orbital with  $\pi$  orbitals of axial CN ligands coordinated to magnetic centers is symmetry forbidden. In this case ferromagnetic coupling is expected for the  $\{\text{Mn}^{\text{II}}(\text{CN})_2\text{Pc}\cdot(\text{Mn}^{\text{II}}(\text{acac})_2)_2\}^{2-}$  dianions<sup>8</sup>. However angular coordination of  $\text{Mn}^{\text{II}}(\text{acac})_2$  units to cyano groups disturbs pure  $\pi$  symmetry of its frontier orbitals and favors enhancement of antiferromagnetic contribution into the magnetic coupling constant. The increase of antiferromagnetic contribution in the

cationic surrounding probably is due to considerable electron density transfer of 0.25 to each {Cryptand(K<sup>+</sup>)} unit. As a result, the charge of the CN ligands becomes -0.220 in neutral structure (Fig. S42) instead of -0.234 in {Mn<sup>II</sup>(CN)<sub>2</sub>Pc·(Mn<sup>II</sup>(acac)<sub>2</sub>)<sub>2</sub>}<sup>2-</sup> and side-on dispositions of the cations lead to further perturbation of symmetry of π orbitals. According to the experiment data low spin *S* = 9/2 state is formed in the trinuclear assemblies and interaction between Mn<sup>II</sup> (*S* = 5/2) and Mn<sup>II</sup> (*S* = 1/2) centers is clearly antiferromagnetic and we can assign this effect to the Coulomb interactions in the crystal lattice. Indeed, gap decreases nearly two times in the structure with two counter cations but in real crystal structure each dianionic assembly is surrounded by six such cations. However, this structure is too huge for the calculations.

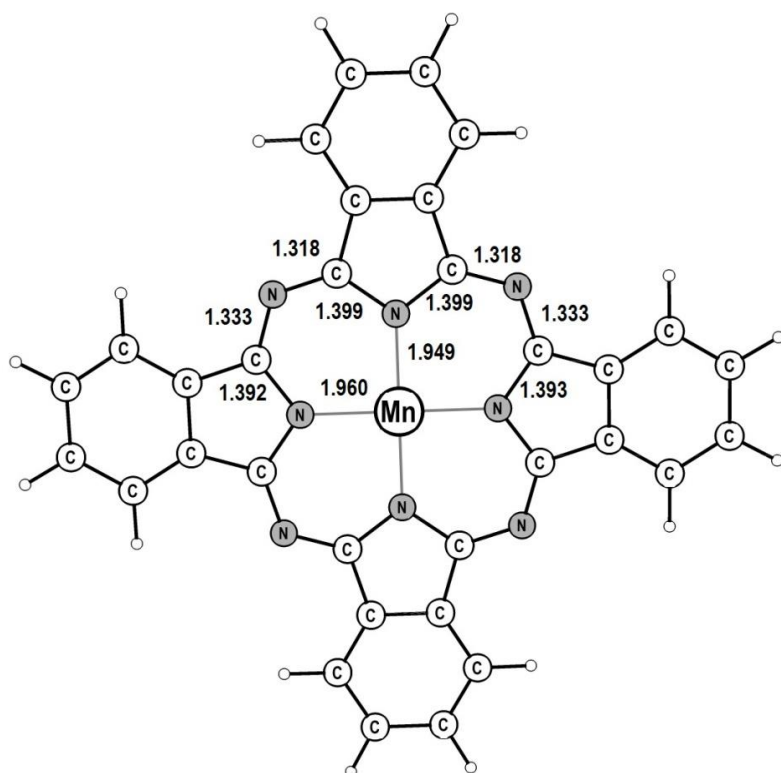

**Fig. S35.** Calculated structure of Mn<sup>II</sup>Pc.

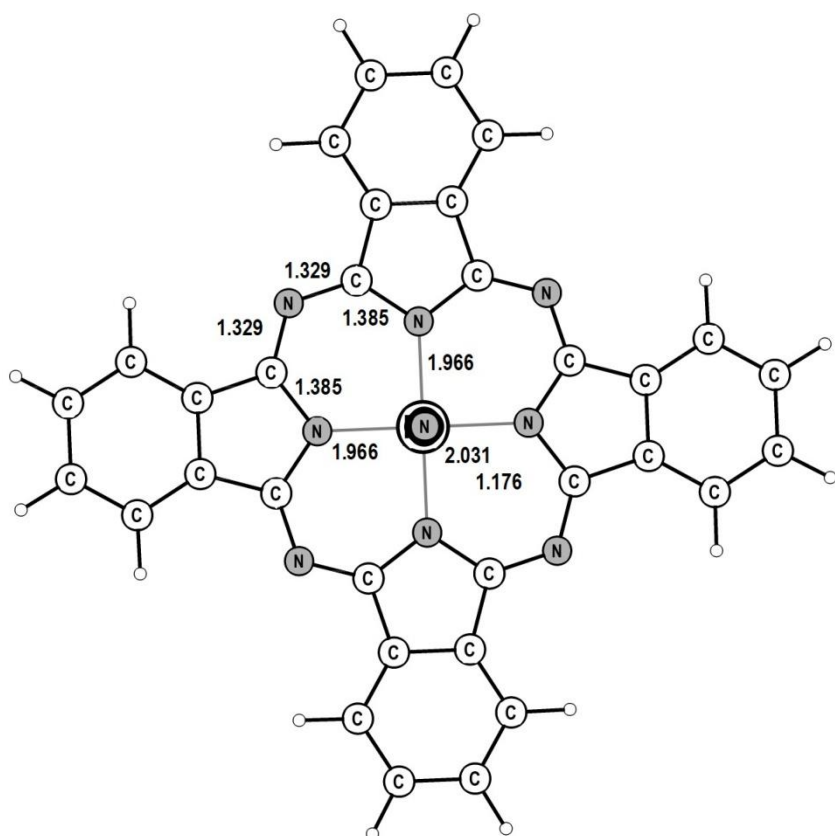

**Fig. S36.** Calculated structure of the {Mn<sup>II</sup>(CN)<sub>2</sub>Pc}<sup>2-</sup> dianion in doublet ground state.

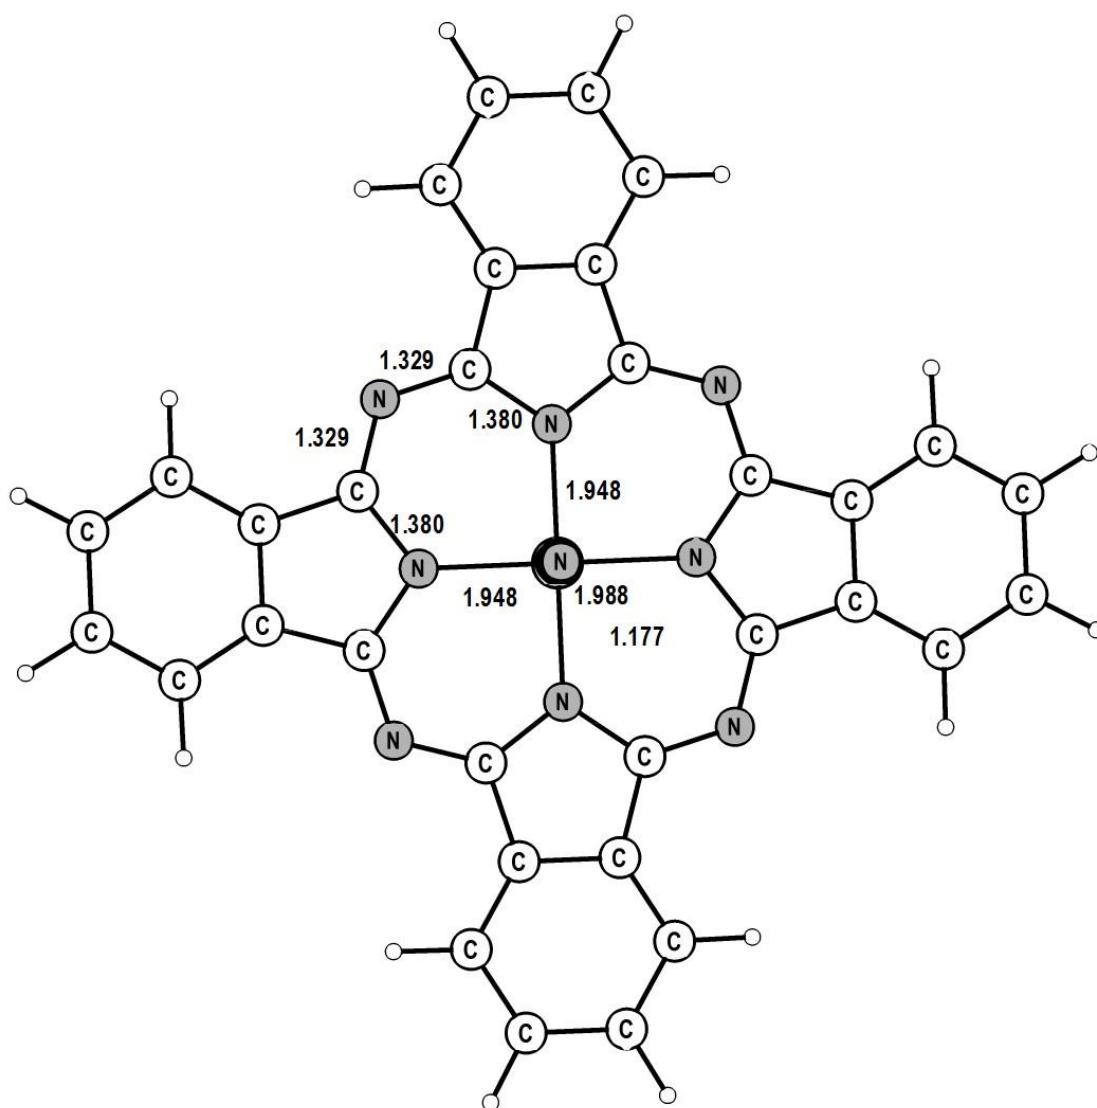

**Fig. S37.** Calculated structure of the {Fe<sup>II</sup>(CN)<sub>2</sub>Pc}<sup>2-</sup> dianion in singlet ground state.



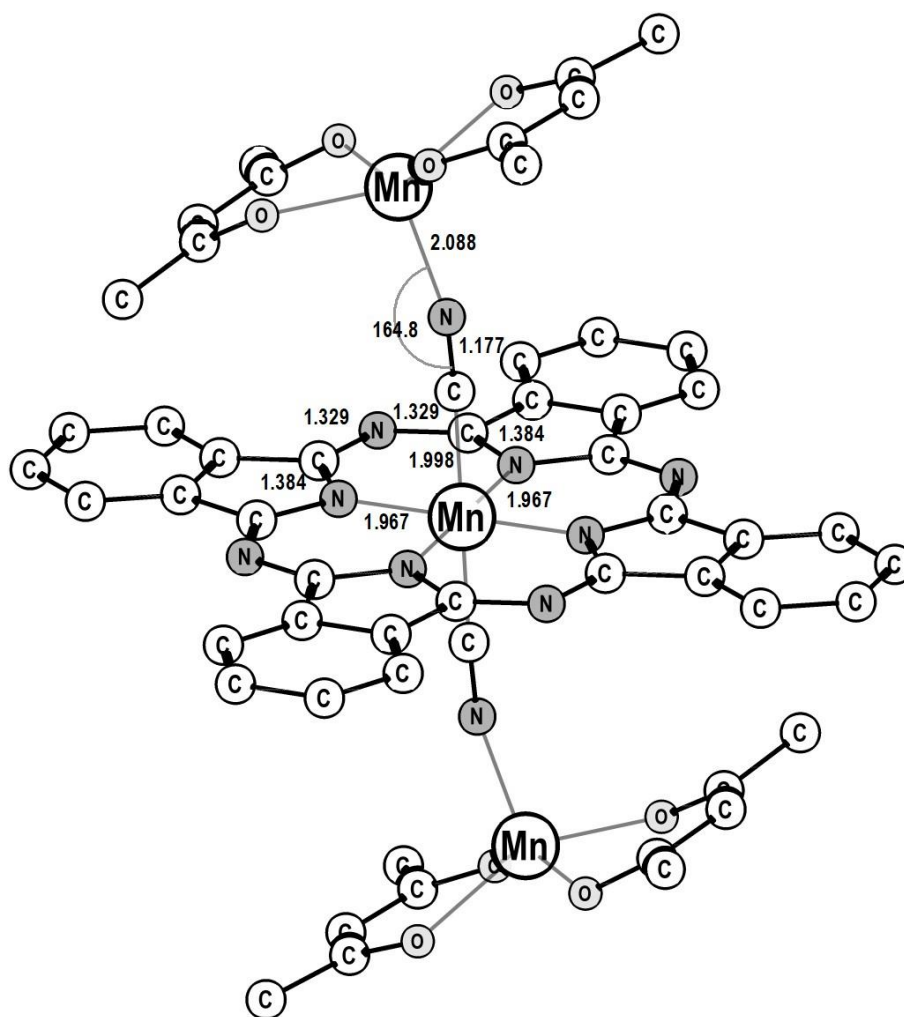

**Fig. S38.** Calculated structure of the  $\{Mn^{II}(CN)_2Pc(Mn^{II}(acac)_2)_2\}^{2-}$  dianion in high-spin state ( $S=11/2$ ).

Hydrogen atoms are omitted for clarity.

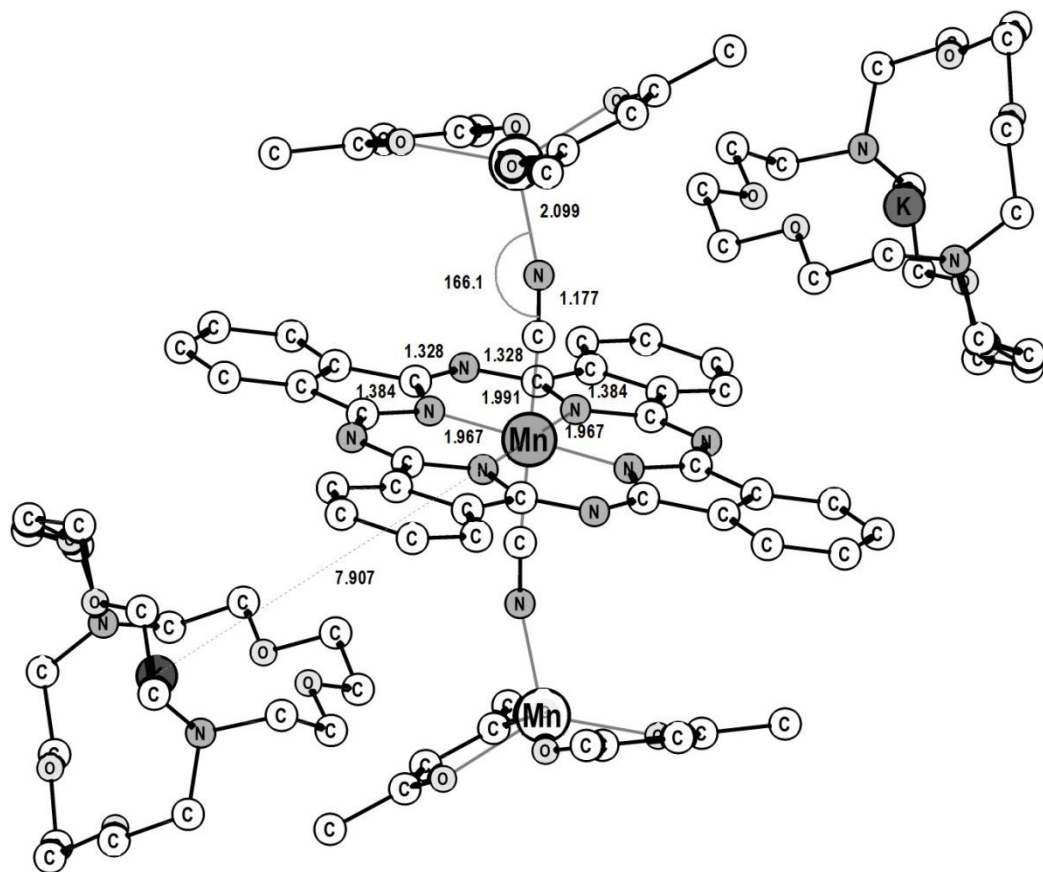

**Fig. S39.** Optimized structure of the  $\{\text{Mn}^{\text{II}}(\text{CN})_2\text{Pc}(\text{Mn}^{\text{II}}(\text{acac})_2)_2\}^{2-}$  dianion in high-spin state ( $S = 11/2$ ) in cationic surrounding from two  $\{\text{Cryptand}(\text{K}^+)\}$  cations. The  $(\text{K}^+)-\text{Mn}^{\text{II}}$  distances found are close to that in the experimental crystal structure of **2**. Hydrogen atoms are omitted for clarity.

## References.

1. D. V. Konarev, A. V. Kuzmin, A. F. Shestakov, I. A. Rompanen, R. N. Lyubovskaya, *Dalton Trans*, 2020, **49**, 16801.
2. G. M. Sheldrick, *Acta Crystallogr., Sect. A: Fundam. Crystallogr.* 2008, **64**, 112.
3. D. V. Konarev, A. V. Kuzmin, S. V. Simonov, S. S. Khasanov, A. Otsuka, H. Yamochi, G. Saito, R. N. Lyubovskaya, *Dalton Trans*. 2012, **41**, 13841.
4. J. P. Perdew, K. Burke, M. Ernzerhof, *Phys. Rev. Lett.* 1996, **77**, 3865.
5. W. J. Stevens, H. Basch, M. Krauss, *J. Chem. Phys.*, 1984, **81**, 6026
6. D. N. Laikov, *Chem. Phys. Lett.*, 1997, **281**, 151.
7. F. L. Hirshfeld, *Theor. Chim. Acta* 1977, **44**, 129.
8. Oliver Kahn: *Molecular magnetism*. VCH-Verlag, Weinheim, New York 1993. ISBN 3-527-89566-3, p. 380.

Cartesian coordinates of the optimized structures

Mn<sup>II</sup>Pc, S=3/2

|    |             |             |             |
|----|-------------|-------------|-------------|
| 25 | -0.00003941 | -0.00013151 | 0.00000189  |
| 7  | 1.52552293  | 1.18791794  | 0.24090239  |
| 7  | 1.35044255  | 1.67687928  | 2.62074280  |
| 7  | -0.43584757 | 0.17365205  | 1.90328795  |
| 7  | -2.41446349 | -1.25296173 | 2.02605869  |
| 6  | 3.42668957  | 2.47622304  | -0.16640066 |
| 6  | 4.52590227  | 3.13841677  | -0.72244129 |
| 6  | 5.30240355  | 3.93425035  | 0.12915312  |
| 6  | 4.98697158  | 4.06205848  | 1.49685567  |
| 6  | 3.88513331  | 3.39895760  | 2.05164088  |
| 6  | 3.11029832  | 2.60558747  | 1.19948188  |
| 6  | 1.92059362  | 1.79420159  | 1.43860270  |
| 6  | 0.26706766  | 0.93142977  | 2.83642343  |
| 6  | -0.36678045 | 0.79544541  | 4.12867569  |
| 6  | -0.06521641 | 1.34168524  | 5.38670111  |
| 6  | -0.89602595 | 1.00358758  | 6.45428876  |
| 6  | -2.00529348 | 0.14034400  | 6.27912573  |
| 6  | -2.30955373 | -0.40474842 | 5.03228464  |
| 6  | -1.47630496 | -0.06754731 | 3.95341878  |
| 6  | -1.49943980 | -0.44271659 | 2.55738371  |
| 6  | -2.42642362 | -1.58887981 | 0.75196276  |
| 7  | -1.52524388 | -1.18839977 | -0.24076044 |
| 7  | -1.35046788 | -1.67678687 | -2.62071367 |
| 7  | 0.43606623  | -0.17379725 | -1.90320323 |
| 7  | 2.41487195  | 1.25246518  | -2.02589500 |
| 6  | -3.42532315 | -2.47810960 | 0.16689353  |
| 6  | -4.52420000 | -3.14079842 | 0.72301812  |
| 6  | -5.30048328 | -3.93690770 | -0.12851846 |
| 6  | -4.98508049 | -4.06464869 | -1.49623232 |
| 6  | -3.88357262 | -3.40107525 | -2.05110929 |
| 6  | -3.10910182 | -2.60723297 | -1.19905749 |
| 6  | -1.92028042 | -1.79462544 | -1.43846398 |
| 6  | -0.26746950 | -0.93078092 | -2.83655273 |
| 6  | 0.36581564  | -0.79407041 | -4.12900612 |
| 6  | 0.06333620  | -1.33908670 | -5.38734416 |
| 6  | 0.89364825  | -1.00034672 | -6.45511533 |
| 6  | 2.00316405  | -0.13744590 | -6.27987564 |
| 6  | 2.30823375  | 0.40656061  | -5.03275466 |
| 6  | 1.47541368  | 0.06881733  | -3.95373016 |
| 6  | 1.49936040  | 0.44293181  | -2.55742325 |
| 6  | 2.42726521  | 1.58767171  | -0.75162678 |
| 1  | 4.76325368  | 3.03415026  | -1.78159494 |
| 1  | 6.16778793  | 4.46517496  | -0.27095565 |
| 1  | 5.61342795  | 4.68981226  | 2.13273189  |
| 1  | 3.63416844  | 3.49296817  | 3.10861472  |
| 1  | 0.79040462  | 2.00533337  | 5.51462220  |
| 1  | -0.69135420 | 1.40999689  | 7.44622826  |
| 1  | -2.63166373 | -0.10008953 | 7.13985255  |
| 1  | -3.16187840 | -1.06981245 | 4.89047380  |

|   |             |             |             |
|---|-------------|-------------|-------------|
| 1 | -4.76161318 | -3.03651911 | 1.78215815  |
| 1 | -6.16560505 | -4.46819769 | 0.27167481  |
| 1 | -5.61129382 | -4.69271706 | -2.13204048 |
| 1 | -3.63281943 | -3.49478916 | -3.10816003 |
| 1 | -0.79242147 | -2.00254949 | -5.51530972 |
| 1 | 0.68825467  | -1.40579975 | -7.44729721 |
| 1 | 2.62914124  | 0.10351251  | -7.14074202 |
| 1 | 3.16062193  | 1.07154061  | -4.89093592 |

{Mn<sup>II</sup>(CN)<sub>2</sub>Pc}<sup>2-</sup>, S = 1/2

|    |             |             |             |
|----|-------------|-------------|-------------|
| 25 | -0.00036251 | 0.00030485  | 0.00000501  |
| 7  | 1.54007325  | 1.19725604  | 0.24341019  |
| 7  | 1.34301127  | 1.67956141  | 2.62642632  |
| 7  | -0.44026641 | 0.17844809  | 1.90824443  |
| 7  | -2.41763507 | -1.24334926 | 2.03104347  |
| 6  | 3.42668466  | 2.47253842  | -0.16993082 |
| 6  | 4.53020802  | 3.13839486  | -0.71857535 |
| 6  | 5.30980585  | 3.93606578  | 0.12897858  |
| 6  | 4.99284555  | 4.06534680  | 1.49948553  |
| 6  | 3.88933773  | 3.40038850  | 2.04951941  |
| 6  | 3.10866407  | 2.60262575  | 1.20318568  |
| 6  | 1.92044963  | 1.79238134  | 1.43447743  |
| 6  | 0.26041929  | 0.93581381  | 2.83147143  |
| 6  | -0.37697391 | 0.80632238  | 4.13480885  |
| 6  | -0.08199578 | 1.35215810  | 5.39066309  |
| 6  | -0.91401891 | 1.02090147  | 6.46788531  |
| 6  | -2.02058271 | 0.16039096  | 6.29320935  |
| 6  | -2.31709088 | -0.38606046 | 5.03786658  |
| 6  | -1.48608265 | -0.05570759 | 3.95968310  |
| 6  | -1.50184437 | -0.43394465 | 2.55328266  |
| 6  | -2.42575270 | -1.58558196 | 0.74683571  |
| 7  | -1.85889044 | 2.52800621  | -0.66756064 |
| 6  | -1.17772713 | 1.60108367  | -0.42144810 |
| 7  | -1.54042013 | -1.19682714 | -0.24411844 |
| 7  | -1.34412069 | -1.67833538 | -2.62716390 |
| 7  | 0.43947035  | -0.17778084 | -1.90824887 |
| 7  | 2.41884811  | 1.24232285  | -2.03159323 |
| 6  | -3.42561738 | -2.47397801 | 0.16998653  |
| 6  | -4.52873525 | -3.14023463 | 0.71893112  |
| 6  | -5.30891185 | -3.93729400 | -0.12866873 |
| 6  | -4.99284880 | -4.06563484 | -1.49947715 |
| 6  | -3.88975577 | -3.40023869 | -2.04981130 |
| 6  | -3.10850854 | -2.60308362 | -1.20342067 |
| 6  | -1.92114505 | -1.79176074 | -1.43510452 |
| 6  | -0.26149733 | -0.93467901 | -2.83190120 |
| 6  | 0.37644054  | -0.80581826 | -4.13491793 |
| 6  | 0.08078710  | -1.35047426 | -5.39115437 |
| 6  | 0.91346513  | -1.01973994 | -6.46800284 |
| 6  | 2.02094837  | -0.16050944 | -6.29271218 |
| 6  | 2.31798302  | 0.38481140  | -5.03700829 |
| 6  | 1.48612407  | 0.05519310  | -3.95926653 |

|   |             |             |             |
|---|-------------|-------------|-------------|
| 6 | 1.50194059  | 0.43298597  | -2.55257158 |
| 6 | 2.42685804  | 1.58430345  | -0.74704179 |
| 1 | 4.76488984  | 3.03146571  | -1.77922300 |
| 1 | 6.17652020  | 4.46706913  | -0.27368644 |
| 1 | 5.61891836  | 4.69441310  | 2.13792412  |
| 1 | 3.63466499  | 3.49257427  | 3.10693226  |
| 1 | 0.77635136  | 2.01516030  | 5.51379514  |
| 1 | -0.70579885 | 1.43280337  | 7.45898268  |
| 1 | -2.65273938 | -0.08173398 | 7.15172195  |
| 1 | -3.16886779 | -1.05267903 | 4.89096767  |
| 1 | -4.76299319 | -3.03360977 | 1.77970422  |
| 1 | -6.17548562 | -4.46841266 | 0.27415017  |
| 1 | -5.61944178 | -4.69413364 | -2.13796407 |
| 1 | -3.63599360 | -3.49144937 | -3.10752694 |
| 1 | -0.77826390 | -2.01248114 | -5.51471773 |
| 1 | 0.70470802  | -1.43054000 | -7.45944739 |
| 1 | 2.65365609  | 0.08112659  | -7.15095787 |
| 1 | 3.17017787  | 1.05079978  | -4.88968894 |
| 6 | 1.17717318  | -1.60022256 | 0.42165508  |
| 7 | 1.85894379  | -2.52672262 | 0.66767778  |

{Fe<sup>II</sup>(CN)<sub>2</sub>Pc}<sup>2-</sup>, S = 0

|    |             |             |             |
|----|-------------|-------------|-------------|
| 26 | -0.00047307 | 0.00040251  | -0.00013136 |
| 7  | 1.52629626  | 1.18551234  | 0.24127341  |
| 7  | 1.34091546  | 1.67327795  | 2.61984225  |
| 7  | -0.43466786 | 0.17492042  | 1.89073276  |
| 7  | -2.40950651 | -1.24339680 | 2.02755837  |
| 6  | 3.41837246  | 2.46775529  | -0.17002215 |
| 6  | 4.52071446  | 3.13193095  | -0.72023904 |
| 6  | 5.30045256  | 3.93054495  | 0.12788107  |
| 6  | 4.98324274  | 4.06031920  | 1.49713769  |
| 6  | 3.87953622  | 3.39421748  | 2.04780838  |
| 6  | 3.10196862  | 2.59615381  | 1.20072757  |
| 6  | 1.91179027  | 1.78127094  | 1.42439915  |
| 6  | 0.25828632  | 0.92767919  | 2.81626640  |
| 6  | -0.37493690 | 0.80364919  | 4.12556916  |
| 6  | -0.07928895 | 1.35093144  | 5.37942730  |
| 6  | -0.91228868 | 1.01928623  | 6.45702498  |
| 6  | -2.01760628 | 0.15901620  | 6.28228985  |
| 6  | -2.31350123 | -0.38848995 | 5.02620812  |
| 6  | -1.48117555 | -0.05738287 | 3.95074928  |
| 6  | -1.48923165 | -0.43279096 | 2.54022343  |
| 6  | -2.41123419 | -1.57927379 | 0.74150290  |
| 7  | -1.83323603 | 2.49614647  | -0.65589022 |
| 6  | -1.15211756 | 1.56809953  | -0.41108204 |
| 7  | -1.52607094 | -1.18615547 | -0.24100211 |
| 7  | -1.34177513 | -1.67228469 | -2.62004229 |
| 7  | 0.43517276  | -0.17576882 | -1.89044493 |
| 7  | 2.41119933  | 1.24057353  | -2.02657641 |
| 6  | -3.41757719 | -2.46909712 | 0.17044791  |
| 6  | -4.52007081 | -3.13315880 | 0.72050743  |

|   |             |             |             |
|---|-------------|-------------|-------------|
| 6 | -5.30121401 | -3.92971949 | -0.12825353 |
| 6 | -4.98523492 | -4.05768506 | -1.49797500 |
| 6 | -3.88139358 | -3.39170620 | -2.04849689 |
| 6 | -3.10240248 | -2.59575833 | -1.20076225 |
| 6 | -1.91239383 | -1.78066056 | -1.42449508 |
| 6 | -0.25852036 | -0.92750705 | -2.81624178 |
| 6 | 0.37533286  | -0.80422271 | -4.12529186 |
| 6 | 0.07819369  | -1.34977481 | -5.37952879 |
| 6 | 0.91163143  | -1.01895876 | -6.45704301 |
| 6 | 2.01840214  | -0.16062511 | -6.28190926 |
| 6 | 2.31564683  | 0.38530138  | -5.02545569 |
| 6 | 1.48273220  | 0.05519954  | -3.95013874 |
| 6 | 1.49136814  | 0.42975713  | -2.53941508 |
| 6 | 2.41278861  | 1.57691166  | -0.74074691 |
| 1 | 4.75491083  | 3.02501110  | -1.78098930 |
| 1 | 6.16698124  | 4.46195535  | -0.27472960 |
| 1 | 5.60880126  | 4.69017710  | 2.13535652  |
| 1 | 3.62473026  | 3.48610571  | 3.10521130  |
| 1 | 0.77862778  | 2.01453271  | 5.50240523  |
| 1 | -0.70482238 | 1.43154802  | 7.44816801  |
| 1 | -2.64995469 | -0.08307235 | 7.14071432  |
| 1 | -3.16487328 | -1.05547445 | 4.87863907  |
| 1 | -4.75364188 | -3.02728442 | 1.78150128  |
| 1 | -6.16801419 | -4.46080374 | 0.27419621  |
| 1 | -5.61198675 | -4.68584803 | -2.13668785 |
| 1 | -3.62759211 | -3.48185778 | -3.10629270 |
| 1 | -0.78089092 | -2.01181692 | -5.50259364 |
| 1 | 0.70296685  | -1.42973394 | -7.44854951 |
| 1 | 2.65113594  | 0.08081153  | -7.14023350 |
| 1 | 3.16791639  | 1.05109641  | -4.87771563 |
| 6 | 1.15275955  | -1.56616140 | 0.41038527  |
| 7 | 1.83482042  | -2.49362488 | 0.65482150  |

$\{\text{Mn}^{\text{II}}(\text{CN})_2\text{Pc}(\text{Mn}^{\text{II}}(\text{acac})_2)_2\}^{2-}$ ,  $S = 11/2$

|    |             |             |             |
|----|-------------|-------------|-------------|
| 25 | -0.00159860 | 0.00108751  | -0.00214999 |
| 25 | -0.84048387 | -4.79876864 | -1.83428504 |
| 8  | 1.19853494  | -5.32468362 | -1.87824331 |
| 8  | -0.53645526 | -4.26148655 | -3.84860933 |
| 8  | -2.85760800 | -5.24246287 | -2.32573302 |
| 8  | -1.12429203 | -6.28559469 | -0.34502293 |
| 7  | -0.32554408 | -0.76805015 | 3.28487902  |
| 7  | 1.19110912  | -0.73369173 | 1.37842811  |
| 7  | 3.23082556  | -1.02088652 | 0.07733185  |
| 7  | 1.46155875  | -0.08809563 | -1.31399574 |
| 7  | -0.80185166 | -2.94262089 | -0.87811501 |
| 6  | -1.37992604 | -0.27906191 | 2.64053092  |
| 6  | 0.84734670  | -0.97713396 | 2.69659156  |
| 6  | 2.00505340  | -1.51932218 | 3.39914442  |
| 6  | 2.19861738  | -1.92821419 | 4.72374633  |
| 1  | 1.38338132  | -1.86376787 | 5.44617571  |
| 6  | 3.46167689  | -2.41454183 | 5.08362121  |

1 3.64248372 -2.73996073 6.11090458  
6 4.50763203 -2.49070792 4.13939598  
1 5.48208952 -2.87589194 4.44917379  
6 4.31471469 -2.08117092 2.81409168  
1 5.11627383 -2.13697387 2.07582044  
6 3.05271376 -1.59444616 2.45394206  
6 2.51469565 -1.09325959 1.19411421  
6 2.73940247 -0.55816433 -1.06738864  
6 3.52043433 -0.48433333 -2.29681302  
6 4.84331157 -0.82976067 -2.59664352  
1 5.49494961 -1.24187109 -1.82451975  
6 5.29146038 -0.63784866 -3.90967550  
1 6.31769759 -0.90360865 -4.17447884  
6 4.43552068 -0.11082430 -4.90045991  
1 4.81197484 0.02343229 -5.91740371  
6 3.11211269 0.23613801 -4.60057290  
1 2.44042657 0.63890007 -5.36035564  
6 2.66343454 0.04331486 -3.28880176  
6 -0.53506403 -1.85153203 -0.52728084  
6 3.50525022 -4.77167060 -2.02544948  
1 3.55689923 -4.17898917 -1.09807257  
1 4.24328381 -4.37630969 -2.73603374  
1 3.75212063 -5.81113008 -1.76255596  
6 2.08269069 -4.70642565 -2.56176954  
6 1.83302836 -3.96041138 -3.73676855  
1 2.67637511 -3.45641653 -4.20744210  
6 0.55074369 -3.76741921 -4.30100064  
6 0.41880839 -2.87862221 -5.52910647  
1 -0.22717483 -3.37039000 -6.27162424  
1 1.39006241 -2.63128005 -5.97797499  
1 -0.07958048 -1.94219247 -5.23123040  
6 -2.10548090 -7.30307234 1.56184832  
1 -1.43141197 -8.16799654 1.46895157  
1 -3.07614306 -7.63163171 1.95803048  
1 -1.63965654 -6.60742354 2.27686734  
6 -2.22338545 -6.60772067 0.21026556  
6 -3.51280522 -6.35990950 -0.31728526  
1 -4.37445636 -6.67609138 0.27022479  
6 -3.75366286 -5.68744662 -1.53866619  
6 -5.19565979 -5.44559438 -1.97039371  
1 -5.37868312 -4.36024563 -1.99671505  
1 -5.92615899 -5.91873525 -1.29986895  
1 -5.33674492 -5.82052029 -2.99539711  
7 0.32233316 0.77025923 -3.28917247  
7 -1.19431594 0.73587976 -1.38270678  
7 -3.23402027 1.02311705 -0.08161187  
7 -1.46480787 0.09016852 1.30966396  
6 1.37661107 0.28096562 -2.64491690  
6 -0.85053339 0.97937558 -2.70089050  
6 -2.00813564 1.52193585 -3.40334904  
6 -2.20171738 1.93117507 -4.72785176  
1 -1.38652005 1.86683557 -5.45033768



|    |             |             |             |
|----|-------------|-------------|-------------|
| 6  | -3.46473868 | 2.41774304  | -5.08757443 |
| 1  | -3.64551760 | 2.74345352  | -6.11477136 |
| 6  | -4.51066959 | 2.49381080  | -4.14331288 |
| 1  | -5.48510008 | 2.87915324  | -4.45298774 |
| 6  | -4.31774565 | 2.08395144  | -2.81811197 |
| 1  | -5.11923001 | 2.13962175  | -2.07974356 |
| 6  | -3.05577358 | 1.59703882  | -2.45813875 |
| 6  | -2.51784540 | 1.09557160  | -1.19837270 |
| 6  | -2.74263516 | 0.56031362  | 1.06307048  |
| 6  | -3.52377182 | 0.48617150  | 2.29240685  |
| 6  | -4.84663940 | 0.83162537  | 2.59224808  |
| 1  | -5.49819873 | 1.24404738  | 1.82022488  |
| 6  | -5.29489665 | 0.63933762  | 3.90518905  |
| 1  | -6.32113215 | 0.90509947  | 4.16999956  |
| 6  | -4.43908293 | 0.11193063  | 4.89587622  |
| 1  | -4.81564811 | -0.02263444 | 5.91273769  |
| 6  | -3.11566846 | -0.23500713 | 4.59599387  |
| 1  | -2.44400241 | -0.63789112 | 5.35572685  |
| 6  | -2.66686958 | -0.04175258 | 3.28432656  |
| 25 | 0.84314805  | 4.79681664  | 1.83760005  |
| 8  | -1.19418322 | 5.32873168  | 1.88419289  |
| 8  | 0.53764374  | 4.25176478  | 3.84955058  |
| 8  | 2.86117918  | 5.23367588  | 2.33069330  |
| 8  | 1.13057489  | 6.28883531  | 0.35393963  |
| 7  | 0.79958927  | 2.94428254  | 0.87467453  |
| 6  | 0.53222615  | 1.85349888  | 0.52331576  |
| 6  | -3.50230800 | 4.78105747  | 2.02856925  |
| 1  | -3.55496539 | 4.19254564  | 1.09859903  |
| 1  | -4.24157490 | 4.38443907  | 2.73717502  |
| 1  | -3.74668118 | 5.82221585  | 1.77004957  |
| 6  | -2.08009099 | 4.71012839  | 2.56511321  |
| 6  | -1.83279246 | 3.95878963  | 3.73717722  |
| 1  | -2.67758616 | 3.45516879  | 4.20566175  |
| 6  | -0.55092955 | 3.75911379  | 4.30016858  |
| 6  | -0.42135019 | 2.86325547  | 5.52334512  |
| 1  | 0.23385142  | 3.34463190  | 6.26452800  |
| 1  | -1.39266281 | 2.62354768  | 5.97625623  |
| 1  | 0.06533529  | 1.92297792  | 5.21796740  |
| 6  | 2.11448766  | 7.31261030  | -1.54816576 |
| 1  | 1.44191526  | 8.17828869  | -1.45159800 |
| 1  | 3.08592150  | 7.64125057  | -1.94238666 |
| 1  | 1.64777894  | 6.62108125  | -2.26659959 |
| 6  | 2.23050692  | 6.61089707  | -0.19968316 |
| 6  | 3.51927914  | 6.35785920  | 0.32698479  |
| 1  | 4.38174502  | 6.67456627  | -0.25904463 |
| 6  | 3.75840323  | 5.67977666  | 1.54559148  |
| 6  | 5.19974588  | 5.43286277  | 1.97659283  |
| 1  | 5.37984141  | 4.34696812  | 2.00006519  |
| 1  | 5.93146043  | 5.90586303  | 1.30729768  |
| 1  | 5.34189675  | 5.80471159  | 3.00257843  |

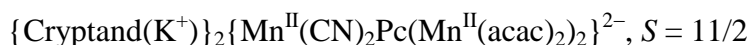

|    |             |             |             |
|----|-------------|-------------|-------------|
| 25 | -0.01943859 | 0.00241732  | 0.01601042  |
| 25 | 0.13390624  | -4.90629744 | -1.73470354 |
| 8  | 2.12071869  | -5.42248551 | -1.40356209 |
| 8  | 0.82773070  | -4.16970445 | -3.62120974 |
| 8  | -1.54045152 | -5.75095688 | -2.72806114 |
| 8  | -0.45230940 | -6.15430969 | -0.12045716 |
| 7  | -2.07900532 | -0.60874150 | 2.63834750  |
| 7  | 0.21923568  | -0.70425649 | 1.83590918  |
| 7  | 2.61094957  | -1.16695087 | 1.80852696  |
| 7  | 1.91003150  | -0.19751410 | -0.31414399 |
| 7  | -0.28111696 | -2.99678025 | -0.96502906 |
| 6  | -2.60279941 | -0.10704405 | 1.52581907  |
| 6  | -0.78744421 | -0.88998322 | 2.76763178  |
| 6  | -0.21904782 | -1.48556401 | 3.97208100  |
| 6  | -0.78920308 | -1.87987492 | 5.18853913  |
| 1  | -1.85416978 | -1.73323279 | 5.37418831  |
| 6  | 0.04475277  | -2.47476571 | 6.14319425  |
| 1  | -0.37308139 | -2.79992412 | 7.09804396  |
| 6  | 1.41626283  | -2.68094978 | 5.88172787  |
| 1  | 2.03362095  | -3.17662562 | 6.63489387  |
| 6  | 1.98749747  | -2.28085861 | 4.66685201  |
| 1  | 3.04175752  | -2.45499632 | 4.44366914  |
| 6  | 1.15862348  | -1.66976920 | 3.71908524  |
| 6  | 1.40875022  | -1.16136600 | 2.37544901  |
| 6  | 2.83073997  | -0.72496909 | 0.57404560  |
| 6  | 4.14558428  | -0.74662158 | -0.05749027 |
| 6  | 5.40053879  | -1.18142403 | 0.38668002  |
| 1  | 5.51933599  | -1.59757475 | 1.38868183  |
| 6  | 6.48349536  | -1.07215974 | -0.49539777 |
| 1  | 7.47239943  | -1.41744468 | -0.18425683 |
| 6  | 6.31656006  | -0.53835403 | -1.79124235 |
| 1  | 7.17868443  | -0.47179941 | -2.45797586 |
| 6  | 5.06114424  | -0.10706052 | -2.23712770 |
| 1  | 4.92025702  | 0.29701588  | -3.24055029 |
| 6  | 3.97777496  | -0.21926417 | -1.35784267 |
| 6  | -0.23868938 | -1.87345430 | -0.61621447 |
| 6  | 4.45763709  | -5.08846700 | -1.17086906 |
| 1  | 4.37026664  | -4.66558440 | -0.15805631 |
| 1  | 5.31807830  | -4.63578431 | -1.67995519 |
| 1  | 4.62454902  | -6.16990829 | -1.05440597 |
| 6  | 3.14972307  | -4.85938572 | -1.91071961 |
| 6  | 3.15344465  | -4.05173359 | -3.07006365 |
| 1  | 4.10345152  | -3.61685018 | -3.37741219 |
| 6  | 2.01074531  | -3.74238088 | -3.84353458 |
| 6  | 2.17407573  | -2.80377676 | -5.03026498 |
| 1  | 1.64194643  | -3.21348037 | -5.90151748 |
| 1  | 3.22639314  | -2.62809824 | -5.28858458 |
| 1  | 1.71193369  | -1.83438384 | -4.78219657 |
| 6  | -1.76193392 | -7.36350820 | 1.44526256  |
| 1  | -0.91991394 | -8.02702625 | 1.69237777  |

|    |             |             |             |
|----|-------------|-------------|-------------|
| 1  | -2.70426437 | -7.92005181 | 1.53107219  |
| 1  | -1.75256774 | -6.54693911 | 2.18310586  |
| 6  | -1.54410756 | -6.77685146 | 0.05839772  |
| 6  | -2.55096893 | -6.96149368 | -0.92538689 |
| 1  | -3.42973699 | -7.54204497 | -0.64685110 |
| 6  | -2.48774020 | -6.45837511 | -2.24111956 |
| 6  | -3.63959095 | -6.75830499 | -3.19358054 |
| 1  | -4.10864125 | -5.80942412 | -3.50018252 |
| 1  | -4.39941067 | -7.41215185 | -2.74469187 |
| 1  | -3.24015304 | -7.23289706 | -4.10267710 |
| 7  | 2.04050954  | 0.61606893  | -2.60610995 |
| 7  | -0.25785283 | 0.71105412  | -1.80356246 |
| 7  | -2.65024878 | 1.16965032  | -1.77783598 |
| 7  | -1.94897730 | 0.20071876  | 0.34505558  |
| 6  | 2.56328997  | 0.10907501  | -1.49540809 |
| 6  | 0.74942824  | 0.90072627  | -2.73383838 |
| 6  | 0.18264149  | 1.50422880  | -3.93497077 |
| 6  | 0.75447248  | 1.90581577  | -5.14831173 |
| 1  | 1.81964010  | 1.75990081  | -5.33343096 |
| 6  | -0.07789178 | 2.50753929  | -6.10004730 |
| 1  | 0.34140305  | 2.83910603  | -7.05205176 |
| 6  | -1.44979181 | 2.71210013  | -5.83915989 |
| 1  | -2.06610724 | 3.21311461  | -6.58964534 |
| 6  | -2.02303784 | 2.30336616  | -4.62806309 |
| 1  | -3.07791766 | 2.47540087  | -4.40621140 |
| 6  | -1.19536831 | 1.68698223  | -3.68260502 |
| 6  | -1.44710141 | 1.16980479  | -2.34266151 |
| 6  | -2.87054143 | 0.72376356  | -0.54494355 |
| 6  | -4.18733231 | 0.73584549  | 0.08274506  |
| 6  | -5.44446616 | 1.15880977  | -0.36646636 |
| 1  | -5.56402963 | 1.57084898  | -1.37013615 |
| 6  | -6.52951314 | 1.04131606  | 0.51211555  |
| 1  | -7.52064466 | 1.37548705  | 0.19613474  |
| 6  | -6.36179785 | 0.51263969  | 1.80991315  |
| 1  | -7.22537628 | 0.43999180  | 2.47410634  |
| 6  | -5.10406696 | 0.09350654  | 2.26087182  |
| 1  | -4.96297222 | -0.30705254 | 3.26565437  |
| 6  | -4.01907662 | 0.21216870  | 1.38446858  |
| 25 | -0.16159367 | 4.90766625  | 1.78008651  |
| 8  | -2.15638915 | 5.41310451  | 1.47932622  |
| 8  | -0.81736260 | 4.18826427  | 3.68624832  |
| 8  | 1.53385788  | 5.75621480  | 2.73774640  |
| 8  | 0.39338830  | 6.15017242  | 0.15230860  |
| 7  | 0.24244102  | 2.99711730  | 1.00955444  |
| 6  | 0.19908266  | 1.87605097  | 0.65371197  |
| 6  | -4.49548318 | 5.06537635  | 1.29205141  |
| 1  | -4.42469711 | 4.62787818  | 0.28415607  |
| 1  | -5.34482914 | 4.61695116  | 1.82302746  |
| 1  | -4.66868350 | 6.14434886  | 1.16266991  |
| 6  | -3.17364256 | 4.85170557  | 2.01131005  |
| 6  | -3.15289115 | 4.05819773  | 3.18039118  |
| 1  | -4.09553657 | 3.62416832  | 3.51073086  |

|    |             |             |             |
|----|-------------|-------------|-------------|
| 6  | -1.99517165 | 3.76166481  | 3.93610574  |
| 6  | -2.13390494 | 2.83972133  | 5.13912964  |
| 1  | -1.58708814 | 3.26440502  | 5.99394199  |
| 1  | -3.18064933 | 2.66486476  | 5.41958945  |
| 1  | -1.67272069 | 1.86830930  | 4.89727985  |
| 6  | 1.66153299  | 7.36910239  | -1.43909480 |
| 1  | 0.81213689  | 8.03059241  | -1.66561974 |
| 1  | 2.59996227  | 7.92861852  | -1.54588323 |
| 1  | 1.63727993  | 6.55345813  | -2.17756853 |
| 6  | 1.47711835  | 6.78026723  | -0.04830235 |
| 6  | 2.50236952  | 6.97087069  | 0.91488839  |
| 1  | 3.37236636  | 7.55585652  | 0.61867818  |
| 6  | 2.46788055  | 6.46760631  | 2.23180493  |
| 6  | 3.63680999  | 6.77406879  | 3.16107181  |
| 1  | 4.11508652  | 5.82792905  | 3.46177164  |
| 1  | 4.38546501  | 7.42951932  | 2.69609100  |
| 1  | 3.25301895  | 7.24980878  | 4.07631828  |
| 19 | -5.68861991 | -1.95721436 | -5.13538676 |
| 8  | -4.51940102 | -3.08703310 | -2.84522151 |
| 8  | -2.90126920 | -1.93777465 | -4.99455578 |
| 8  | -7.82493664 | -3.99689934 | -5.50213474 |
| 8  | -5.91550381 | -3.49035650 | -7.63848789 |
| 8  | -7.42430948 | -0.01082846 | -3.88273966 |
| 8  | -6.12951707 | 0.66080374  | -6.39964650 |
| 7  | -7.49893164 | -2.80048969 | -2.75130242 |
| 7  | -4.02831892 | -1.13854368 | -7.62997142 |
| 6  | -6.64280294 | -3.54462199 | -1.80207099 |
| 1  | -6.52937108 | -4.57390459 | -2.17221761 |
| 1  | -7.12646677 | -3.61509405 | -0.80336256 |
| 6  | -5.24261686 | -2.96906721 | -1.62006309 |
| 1  | -5.26999442 | -1.91164343 | -1.29365792 |
| 1  | -4.73303550 | -3.54125259 | -0.82145129 |
| 6  | -3.16074711 | -2.61693682 | -2.69347258 |
| 1  | -2.65592548 | -3.17456411 | -1.88882623 |
| 1  | -3.17100628 | -1.54566457 | -2.42230428 |
| 6  | -2.38841915 | -2.82315939 | -3.97516775 |
| 1  | -1.32375365 | -2.60825609 | -3.78068745 |
| 1  | -2.45852472 | -3.87330704 | -4.30840413 |
| 6  | -2.13251121 | -2.00425890 | -6.19012722 |
| 1  | -2.17693538 | -3.02722253 | -6.61632129 |
| 1  | -1.06856487 | -1.79160166 | -5.97419694 |
| 6  | -2.63440918 | -0.94790177 | -7.16985158 |
| 1  | -2.56584785 | 0.02298469  | -6.65964278 |
| 1  | -1.93443527 | -0.90676952 | -8.03325860 |
| 6  | -8.59874208 | -3.64645122 | -3.23640525 |
| 1  | -9.36753996 | -3.00240782 | -3.68869600 |
| 1  | -9.09164538 | -4.19401346 | -2.40126860 |
| 6  | -8.19072125 | -4.67001611 | -4.29217598 |
| 1  | -7.34996828 | -5.30100638 | -3.94707983 |
| 1  | -9.05245982 | -5.33940785 | -4.48324522 |
| 6  | -7.51406924 | -4.91853843 | -6.54743882 |
| 1  | -8.38581188 | -5.56944552 | -6.75686799 |

1 -6.66321319 -5.56320668 -6.25392758  
6 -7.16435918 -4.15738914 -7.81195659  
1 -7.10128198 -4.87851730 -8.65063532  
1 -7.96441977 -3.42684231 -8.04318057  
6 -5.50036032 -2.80696809 -8.82446067  
1 -6.24288656 -2.02799500 -9.08605226  
1 -5.45696859 -3.51988227 -9.67125589  
6 -4.10607832 -2.22084873 -8.62160393  
1 -3.45332182 -3.04069380 -8.28882413  
1 -3.72572996 -1.89345598 -9.61621262  
6 -8.00983102 -1.56803022 -2.12722422  
1 -7.19708322 -1.11143635 -1.54477944  
1 -8.83156104 -1.78760815 -1.40857030  
6 -8.51482424 -0.51189484 -3.10598523  
1 -9.30237715 -0.90694553 -3.77809220  
1 -8.96587924 0.31144364 -2.51830217  
6 -7.80615769 1.08048342 -4.71912416  
1 -8.24127062 1.89638423 -4.10971014  
1 -8.56580211 0.75512225 -5.45717251  
6 -6.58365218 1.61771001 -5.43880402  
1 -6.85782248 2.56444384 -5.94435741  
1 -5.78569155 1.83483692 -4.70377087  
6 -4.98178801 1.13707562 -7.11577080  
1 -4.15718589 1.34122500 -6.40931303  
1 -5.23065548 2.08842295 -7.62589690  
6 -4.57333229 0.11589711 -8.17295761  
1 -5.46959971 -0.11501773 -8.76805581  
1 -3.84944255 0.60710334 -8.86140449  
19 5.71955263 1.95810370 5.10058346  
8 4.50127212 3.09656793 2.84109302  
8 2.92871096 1.95717184 5.02975562  
8 7.88229630 3.97612733 5.41781434  
8 6.02614588 3.47468889 7.60170486  
8 7.39925414 0.00071530 3.79815419  
8 6.16072538 -0.67586779 6.34319051  
7 7.47532428 2.79229213 2.67337936  
7 4.11424328 1.14172273 7.63543175  
6 6.60150554 3.54598342 1.74823671  
1 6.50438131 4.57454729 2.12502783  
1 7.06102114 3.61691461 0.73820468  
6 5.19340469 2.98055838 1.59783527  
1 5.20604180 1.92467533 1.26571036  
1 4.66790641 3.56001250 0.81497121  
6 3.13830674 2.63008391 2.72235342  
1 2.61625717 3.18561601 1.92739026  
1 3.13887430 1.55758261 2.45554280  
6 2.39663129 2.84349255 4.02078905  
1 1.32658625 2.63381556 3.85157630  
1 2.48046149 3.89396417 4.34976821  
6 2.19341844 2.03362671 6.24537414  
1 2.26308213 3.05550548 6.67091335  
1 1.12129402 1.83519498 6.05806624

|   |            |             |            |
|---|------------|-------------|------------|
| 6 | 2.70689037 | 0.96976874  | 7.21099856 |
| 1 | 2.61406718 | 0.00067357  | 6.70115863 |
| 1 | 2.02838230 | 0.93526011  | 8.09165286 |
| 6 | 8.59452005 | 3.62729484  | 3.13203196 |
| 1 | 9.36939812 | 2.97514915  | 3.56182379 |
| 1 | 9.07014878 | 4.17346823  | 2.28601641 |
| 6 | 8.22369401 | 4.65075269  | 4.20158152 |
| 1 | 7.38071709 | 5.29136004  | 3.88032227 |
| 1 | 9.09689020 | 5.31052811  | 4.37315766 |
| 6 | 7.60631048 | 4.89554438  | 6.47456537 |
| 1 | 8.48817957 | 5.53898948  | 6.66368510 |
| 1 | 6.75300335 | 5.54802066  | 6.20643341 |
| 6 | 7.28444840 | 4.13144733  | 7.74474451 |
| 1 | 7.24917143 | 4.84910593  | 8.58792406 |
| 1 | 8.08477329 | 3.39377895  | 7.95097151 |
| 6 | 5.63839655 | 2.78698742  | 8.79446521 |
| 1 | 6.37879311 | 1.99721522  | 9.02804796 |
| 1 | 5.62929424 | 3.49387068  | 9.64737657 |
| 6 | 4.23189584 | 2.21864920  | 8.62925380 |
| 1 | 3.57943075 | 3.04741454  | 8.31876738 |
| 1 | 3.87682641 | 1.89023910  | 9.63277000 |
| 6 | 7.95994774 | 1.55700402  | 2.03399191 |
| 1 | 7.12996705 | 1.10912736  | 1.46950454 |
| 1 | 8.76687016 | 1.77094940  | 1.29719481 |
| 6 | 8.47687364 | 0.49338536  | 2.99821279 |
| 1 | 9.28352446 | 0.87832914  | 3.65335732 |
| 1 | 8.90589496 | -0.33266576 | 2.39798971 |
| 6 | 7.78648652 | -1.10282550 | 4.61565443 |
| 1 | 8.19460608 | -1.91933486 | 3.98857771 |
| 1 | 8.56905612 | -0.79474123 | 5.33697905 |
| 6 | 6.57518601 | -1.62941330 | 5.36154081 |
| 1 | 6.84768315 | -2.58624238 | 5.84858989 |
| 1 | 5.75531081 | -1.82712468 | 4.64528700 |
| 6 | 5.02684749 | -1.14268249 | 7.08648429 |
| 1 | 4.18159888 | -1.33429263 | 6.40109284 |
| 1 | 5.27769211 | -2.09932039 | 7.58564542 |
| 6 | 4.65815883 | -0.12181341 | 8.15841025 |
| 1 | 5.57220675 | 0.09561733  | 8.73114377 |
| 1 | 3.94663270 | -0.60743296 | 8.86345277 |
